1 **Cytoprotective effects of (E)-N-(2-(3, 5-dimethoxystyryl) phenyl) furan-2-**  
2 **carboxamide (BK3C231) against 4-nitroquinoline 1-oxide-induced damage in**  
3 **CCD-18Co human colon fibroblast cells**

4

5 Huan Huan Tan<sup>1</sup>, Noel F. Thomas<sup>2</sup>, Salmaan H. Inayat-Hussain<sup>3</sup>, Kok Meng Chan<sup>1,\*</sup>

6

7 <sup>1</sup>Toxicology and Risk Assessment Research Group, Centre for Health and Applied Sciences, Faculty  
8 of Health Sciences, Universiti Kebangsaan Malaysia, Kuala Lumpur, Malaysia.

9 <sup>2</sup>Methodist College Kuala Lumpur, Kuala Lumpur, Malaysia.

10 <sup>3</sup>Product Stewardship and Toxicology, Group Health, Safety, Security and Environment, Petroliam  
11 Nasional Berhad (PETRONAS), Kuala Lumpur, Malaysia.

12

13 \*chan@ukm.edu.my (KMC)

14

15

16

17

18

19

20

21

22

23

24

## 25 **Abstract**

26

27 Stilbenes are a group of chemicals characterized with the presence of 1,2-diphenylethylene. Previously,  
28 our group has demonstrated that synthesized (E)-N-(2-(3, 5-dimethoxystyryl) phenyl) furan-2-  
29 carboxamide (BK3C231) possesses potential chemopreventive activity specifically inducing  
30 NAD(P)H:quinone oxidoreductase 1 (NQO1) protein expression and activity. In this study, the  
31 cytoprotective effects of BK3C231 on cellular DNA and mitochondria were investigated in normal  
32 human colon fibroblast, CCD-18Co cells. The cells were pretreated with BK3C231 prior to exposure  
33 to the carcinogen 4-nitroquinoline 1-oxide (4NQO). BK3C231 was able to inhibit 4NQO-induced  
34 cytotoxicity. Cells treated with 4NQO alone caused high level of DNA and mitochondrial damages.  
35 However, pretreatment with BK3C231 protected against these damages by reducing DNA strand  
36 breaks and micronucleus formation as well as decreasing losses of mitochondrial membrane potential  
37 ( $\Delta\Psi_m$ ) and cardiolipin. Interestingly, our study has demonstrated that nitrosative stress instead of  
38 oxidative stress was involved in 4NQO-induced DNA and mitochondrial damages. Inhibition of  
39 4NQO-induced nitrosative stress by BK3C231 was observed through a decrease in nitric oxide (NO)  
40 level and an increase in glutathione (GSH) level. These new findings elucidate the chemopreventive  
41 potential of BK3C231 specifically its cytoprotective effects in human colon fibroblast CCD-18Co cell  
42 model.

43

44

45

46

47

48

## 49 **1. Introduction**

50 Cancer-related mortality has tremendously increased and is expected to further increase despite  
51 emerging medical improvements [1]. The global cancer burden is estimated to have risen in 2018 with  
52 colorectal cancer being the third most commonly diagnosed cancer and is ranked second in terms of  
53 mortality due to poor prognosis worldwide [2]. In Malaysia, cancer is the third most common cause of  
54 death after cardiovascular diseases and respiratory diseases. According to Malaysia National Cancer  
55 Registry (MNCR) Report 2007-2011, colorectal cancer is the second most common cancer among  
56 Malaysian residents [3].

57 Advances in costly surgical and medical therapies for primary and metastatic colorectal cancer  
58 have had limited impact on cure rates and long-term survival [4,5]. Local recurrences after surgery,  
59 treatment-induced long-term complications and toxicities, chemotherapy-induced adverse effects as  
60 well as cancerous cell resistance towards chemotherapy due to development of multidrug resistance  
61 phenotypes and tumour heterogeneity become major reasons for chemoprevention to gain momentum  
62 [6-8].

63 Chemopreventive approaches have effectively decreased cancer incidence rates such as for lung  
64 cancer and cervical cancer [2], thus strengthening the need to prevent or limit the disease to occur in  
65 the first place. Cancer chemoprevention is an essential approach which uses nontoxic natural or  
66 synthetic pharmacological agents to prevent, block or reverse the multistep processes of carcinogenesis  
67 [9,10]. Chemopreventive agents inhibit the invasive development of cancer by affecting the three  
68 defined stages of carcinogenesis namely initiation, promotion and progression which are induced by  
69 carcinogens through genetic and epigenetic mechanisms [11,12].

70 Exposure of cells to carcinogen causes DNA mutation and leads to accumulation of additional  
71 genetic changes through sustained cell proliferation. This rapid and irreversible process is known as  
72 tumour initiation, the first stage of carcinogenesis. Tumour promotion, which is referred to as the

73 lengthy and reversible second stage of carcinogenesis, involves the selective clonal expansion of  
74 initiated cells to produce preneoplastic lesion which allows for additional mutations to accumulate. The  
75 final stage of carcinogenesis, tumour progression, involves neoplastic transformation after  
76 accumulating chromosomal aberrations and karyotypic instability resulting in metastatic malignancy  
77 [13,14].

78 Altered cellular redox status and disrupted oxidative homeostasis play a key role towards cancer  
79 development by enhancing DNA damage and modifying key cellular processes such as cell  
80 proliferation and apoptosis [15]. Oxidative/nitrosative stress is the result of disequilibrium between  
81 reactive oxygen species (ROS)/reactive nitrogen species (RNS) and antioxidants [16]. If  
82 oxidative/nitrosative stress persists, this may lead to modification of signal transduction and gene  
83 expression, which in turn lead to mutation, transformation and progression of cancer [17,18].

84 Stilbenes are a group of phenylpropanoids produced in the skin, seeds, leaves and sapwood of  
85 a wide variety of plant species including dicotyledon angiosperms such as grapevine (*Vitis vinifera*),  
86 peanut (*Arachis hypogaea*) and Japanese knotweed (*Fallopia Japonica*); monocotyledons like sorghum  
87 (*Sorghum bicolor*) and gymnosperms such as several *Pinus* and *Picea* species [19-21]. They are a well-  
88 known class of naturally occurring phytochemicals acting as antifungal phytoalexins, providing  
89 protection against UV light exposure and also involved in bacterial root nodulation and coloration  
90 [19,22-24]. These compounds bear the core structure of 1,2-diphenylethylene in which two benzene  
91 rings are separated by an ethanyl or ethenyl bridge [25].

92 Despite being known as plant defense compounds, stilbenes have an enormous diversity of  
93 effects on biological and cellular processes applicable to human health, particularly in chemoprevention.  
94 Resveratrol, as the biosynthetic precursor of most oligostilbenoids, has been known to possess a myriad  
95 of biological activities such as anticancer, antioxidant, anti-aging, antimicrobial, cardioprotection, anti-  
96 diabetes, anti-obesity, and anti-inflammation [26-33]. However, low water solubility and poor  
97 bioavailability are the major setbacks to the exploitation of these biological activities [34,35].

98 Our group has previously demonstrated that synthetic stilbene BK3C231 (Fig 1) potently  
99 induced antioxidant gene NQO1 as a detoxifying mechanism in human embryonic hepatocytes, WRL-  
100 68 cells [36]. Therefore in this study, we proposed to elucidate the chemopreventive effects specifically  
101 the cytoprotective effects of BK3C231 using normal human colon fibroblast CCD-18Co cells. We  
102 anticipate this study will accelerate the development of BK3C231 as a potential drug for  
103 chemoprevention.

104

105 **Fig 1. Chemical structure of BK3C231 [36].**

106

## 107 **2. Materials and methods**

### 108 **2.1 Test compounds**

109 (E)-N-(2-(3, 5-Dimethoxystyryl) phenyl) furan-2-carboxamide (BK3C231) was synthesized and  
110 contributed by Dr. Noel Francis Thomas and Dr. Kee Chin Hui from Department of Chemistry, Faculty  
111 of Science, University of Malaya (Kuala Lumpur, Malaysia). 4-Nitroquinoline 1-oxide (4NQO) (Cas.  
112 No: 56-57-5,  $\geq 98\%$  purity) was purchased from Sigma-Aldrich (St. Louis, MO, USA). Stock solution  
113 of BK3C231 at 100mM and 4NQO at 25mg/mL were prepared by dissolving the compounds in solvent  
114 dimethyl sulfoxide (DMSO, Thermo Fisher Scientific, Waltham, MA, USA).

115

### 116 **2.2 Cell culture**

117 The normal human colon fibroblast CCD-18Co cell line (ATCC CRL-1459) was obtained from the  
118 American Type Culture Collection (ATCC, Manassas, VA, USA). CCD-18Co cells were grown in  
119 Minimum Essential Medium (MEM, Gibco, Grand Island, NY, USA) supplemented with 10% fetal  
120 bovine serum (FBS, Biowest, Nuaille, France) and 1% 100x Antibiotic-Antimycotic solution (Nacalai

121 Tesque, Kyoto, Japan). All cells were between passages 3–5 for all experiments and maintained at 37°C  
122 with 5% CO<sub>2</sub>.

123

### 124 **2.3 MTT cytotoxicity assay**

125 CCD-18Co cells were seeded in 96-well microplate (Nest Biotechnology, Jiangsu, China) at the  
126 concentration of 5 x 10<sup>4</sup> cells/mL in a volume of 200 µL per well. The seeded cells were incubated  
127 under 5% CO<sub>2</sub> at 37°C for 24 hours prior to respective compound treatments at different timepoints.  
128 After incubation, 20 µL of MTT (Sigma-Aldrich, St. Louis, MO, USA) solution (5mg/mL in PBS) was  
129 added to the treated cells and further incubated for 4 hours at 37°C. Subsequently, the total medium in  
130 each well was discarded and the crystalline formazan was solubilised using 200 µL DMSO. For  
131 complete dissolution, the plate was incubated for 15 minutes followed with gentle shaking for 5 minutes.  
132 The cytotoxicity of BK3C231 and 4NQO was assessed by measuring the absorbance of each well at  
133 570 nm. Mean absorbance for each compound concentration was expressed as a percentage of vehicle  
134 control absorbance and plotted versus compound concentration. Inhibitory concentration that kills 50%  
135 of cell population (IC<sub>50</sub>) represents the compound concentration that reduced the mean absorbance at  
136 570 nm to 50% of those in the vehicle control wells.

137

### 138 **2.4 Alkaline comet assay**

139 Seeded cells (5 x 10<sup>4</sup> cells/mL) in 6-well plate (Nest Biotechnology, Jiangsu, China) were pretreated  
140 with BK3C231 at 6.25 µM, 12.5 µM, 25 µM and 50 µM for 2 hours prior to 4NQO treatment at 1 µM  
141 for 1 hour. Following incubation, detached cells in the medium were collected and added back to  
142 trypsinised cells. Then, the suspension was transferred to tube for centrifugation (450 x g/5 minutes at  
143 4°C). The supernatant was removed and pellet was washed with Ca<sup>2+</sup>- and Mg<sup>2+</sup>-free PBS and re-  
144 centrifuged. The pellets left at the bottom were mixed thoroughly with 80 µl of 0.6% w/v LMA (Sigma-

145 Aldrich, St. Louis, MO, USA). The mixture was then pipetted onto the hardened 0.6% w/v NMA  
146 (Sigma-Aldrich, St. Louis, MO, USA) as the first layer gel on the slide. Cover slips were placed to  
147 spread the mixture and slides were left on ice for LMA to solidify. Following removal of the cover  
148 slips, the embedded cells were lysed in a lysis buffer containing 2.5M NaCl (Merck Milipore,  
149 Burlington, MA, USA), 1 mM Na<sub>2</sub>EDTA (Sigma-Aldrich, St. Louis, MO, USA), 10 mM Tris (Bio-  
150 Rad, Hercules, CA, USA) and 1% Triton X-100 (Sigma-Aldrich, St. Louis, MO, USA) overnight at  
151 4°C. After lysis, the slides were soaked in electrophoresis buffer solution for 20 minutes for DNA  
152 unwinding before electrophoresis at 300 mA, 25V for 20 minutes. Subsequently, the slides were rinsed  
153 with neutralising buffer for 5 minutes and stained with 30 µL of 50 µg/mL ethidium bromide (EtBr,  
154 Sigma-Aldrich, St. Louis, MO, USA) solution. Slides were left overnight at 4°C before analyzing with  
155 Olympus BX51 fluorescence microscope (Tokyo, Japan) equipped with 590 nm filter. DNA damage  
156 scoring was performed on 50 cells per slide whereby tail moment representing the product of tail length  
157 and fraction of total DNA in tail was quantified using Comet Score™ software (TriTek Corp,  
158 Sumerduck, VA, USA).

159

## 160 **2.5 Cytokinesis-block micronucleus (CBMN) assay**

161 Seeded cells ( $5 \times 10^4$  cells/mL) in 6-well plate were pretreated with BK3C231 at 6.25 µM, 12.5 µM,  
162 25 µM and 50 µM for 2 hours prior to 4NQO treatment at 1 µM for 2 hours. After incubation, cells  
163 were treated with 4.5 µg/mL Cytochalasin B (Sigma-Aldrich, St. Louis, MO, USA) for 24 hours to  
164 block cytokinesis. The cells were then harvested and centrifuged (450 x g/5 minutes at 4°C). The  
165 supernatant was removed and pellet was resuspended with 300 µL of 0.075M KCl solution for 5  
166 minutes. The cells were then fixed with Carnoy's solution consisting of acetic acid (Sigma-Aldrich, St.  
167 Louis, MO, USA) and methanol (HmbG Chemicals, Hamburg, Germany) prepared at the ratio of 1:3  
168 and spreaded on glass slides which were placed on a slide warmer. The slides were dried overnight and  
169 stained with 30 µL of 20 µg/mL acridine orange (AO, Sigma-Aldrich, St. Louis, MO, USA) prior to

170 fluorescence microscopic observation. The number of viable mononucleated, binucleated and  
171 multinucleated cells per 500 cells were scored to derive Nuclear Division Index (NDI) and frequency  
172 of micronucleus in 1,000 binucleated cells was measured.

173

## 174 **2.6 Mitochondrial membrane potential ( $\Delta\Psi_m$ ), mitochondrial mass** 175 **and ROS assessment**

176 The treated cells ( $5 \times 10^4$  cells/mL) were collected by centrifugation ( $450 \times g/5$  minutes at  $4^\circ\text{C}$ ). The  
177 supernatant was discarded and pellet was resuspended with 1 mL fresh prewarmed FBS-free MEM  
178 with addition of 1  $\mu\text{L}$  of 50  $\mu\text{M}$  tetramethylrhodamine ethyl ester (TMRE, Thermo Fisher Scientific,  
179 Waltham, MA, USA), 5 mM nonyl acridine orange (NAO, Sigma-Aldrich, St. Louis, MO, USA), 10  
180 mM hydroethidine (HE, Thermo Fisher Scientific, Waltham, MA, USA) or 10 mM 2',7'-  
181 dichlorodihydrofluorescein diacetate (DCFH-DA, Thermo Fisher Scientific, Waltham, MA, USA). The  
182 cells stained with TMRE or NAO were incubated for 15 minutes at  $37^\circ\text{C}$  whereas cells stained with HE  
183 and DCFH-DA were incubated for 30 minutes at  $37^\circ\text{C}$  in the dark. After incubation, the cells were  
184 centrifuged ( $450 \times g/5$  minutes at  $4^\circ\text{C}$ ) and pellet was washed with 1 mL chilled PBS solution. The  
185 supernatant was discarded and 500  $\mu\text{L}$  of chilled PBS was used to resuspend the pellets. The stained  
186 cell suspension was transferred to flow tubes and analyzed using FACSCanto II Flow Cytometer (BD  
187 Biosciences, San Jose, CA, USA).

188

## 189 **2.7 Intracellular nitric oxide (NO) assessment using BD Pharmingen™** 190 **Orange Nitric Oxide (NO) Probe staining**

191 The seeded cells ( $5 \times 10^4$  cells/mL) were pre-stained with 1  $\mu\text{L}$  Orange NO probe (BD Biosciences,  
192 San Jose, CA, USA) per 500  $\mu\text{L}$  cell suspension for 30 minutes. The cells were then pretreated with  
193 BK3C231 at 50  $\mu\text{M}$  for 2 hours, 4 hours, 6 hours, 12 hours and 24 hours prior to 4NQO treatment at 1



194  $\mu\text{M}$  for 1 hour. The stained and treated cells were centrifuged ( $450 \times g/5$  minutes at  $4^\circ\text{C}$ ) and pellet was  
195 washed with 1 mL chilled PBS solution. The supernatant was discarded and 500  $\mu\text{L}$  of chilled PBS was  
196 used to resuspend the pellets. The stained cell suspension was transferred to flow tubes and analyzed  
197 using FACSCanto II Flow Cytometer (BD Biosciences, San Jose, CA, USA).

198

## 199 **2.8 Extracellular nitric oxide (NO) assessment using Griess reagent**

200 CCD-18Co cells were seeded in culture dish ( $60 \times 15$  mm) at the concentration of  $5 \times 10^4$  cells/mL.  
201 The seeded cells were incubated under 5%  $\text{CO}_2$  at  $37^\circ\text{C}$  for 24 hours. The cells were then pretreated  
202 with BK3C231 at 50  $\mu\text{M}$  for 2 hours, 4 hours, 6 hours, 12 hours and 24 hours prior to 4NQO treatment  
203 at 1  $\mu\text{M}$  for 1 hour. Subsequently, 100  $\mu\text{L}$  of culture medium from each sample was collected and mixed  
204 with the same volume of Griess reagent (1% sulfanilamide in 5% phosphoric acid and 0.1% N-(1-  
205 naphthyl)ethylenediamine (NNED) hydrochloride in distilled water, Merck Milipore, Burlington, MA,  
206 USA) in 96-well microplate. Absorbance of the mixture in each well was determined at 570 nm. The  
207 concentration of nitrite accumulated in the culture was determined in comparison to the sodium nitrite  
208 standards.

209

## 210 **2.9 Glutathione (GSH) assessment using Ellman's reagent**

211 The treated cells ( $5 \times 10^4$  cells/mL) were detached, collected and centrifuged ( $450 \times g/5$  minutes at  
212  $4^\circ\text{C}$ ). The supernatant was discarded and pellet was resuspended in 100  $\mu\text{L}$  ice-cold lysis buffer (50  
213 mM  $\text{K}_2\text{HPO}_4$ , 1 mM EDTA, pH 6.5 and 0.1 % v/v Triton X-100, Sigma-Aldrich, St. Louis, MO, USA).  
214 The cells were incubated on ice for 15 minutes with gentle tapping from time to time. The crude lysates  
215 were cleared by centrifugation ( $10000 \times g/15$  minutes at  $4^\circ\text{C}$ ). At this point, the lysates were used  
216 immediately or stored at  $-80^\circ\text{C}$  for a day or two. Then, 50  $\mu\text{L}$  of lysates and GSH standards (two fold  
217 dilution from 1.25 mM to 0 mM dissolved in reaction buffer consisting of 0.1 M  $\text{Na}_2\text{HPO}_4 \cdot 7\text{H}_2\text{O}$  and

218 1 mM EDTA, pH 6.5, Sigma-Aldrich, St. Louis, MO, USA) were pipetted into designated wells in a  
219 96-well microplate. After adding 40  $\mu$ l of reaction buffer (0.1 M  $\text{Na}_2\text{HPO}_4 \cdot 7\text{H}_2\text{O}$  and 1 mM EDTA, pH  
220 8), 10  $\mu$ l of 4 mg/ml 5,5'-dithiobis(2-nitrobenzoic acid) (DTNB, Sigma-Aldrich, St. Louis, MO, USA)  
221 in reaction buffer pH 8 was added to wells containing samples and standards. The plate was incubated  
222 for 15 minutes at 37°C. Absorbance of each well was measured at 405 nm using microplate reader (Bio-  
223 Rad, Hercules, CA, USA). The concentration of free thiols in samples was calculated based on GSH  
224 standard and expressed as nmol/mg protein after protein concentration was quantified using Bradford's  
225 method.

226

## 227 **2.10 Statistical analysis**

228 The data are expressed as the mean  $\pm$  standard error of mean (S.E.M.) from at least three independent  
229 experiments. The statistical significance was evaluated using one-way ANOVA with the Tukey post  
230 hoc test used to assess the significance of differences between multiple treatment groups. Differences  
231 were considered statistically significant with a probability level of  $p < 0.05$ .

232

## 233 **3. Results**

### 234 **3.1 Cytotoxic assessment of BK3C231 and 4NQO**

235 The non-cytotoxic concentrations of BK3C231 and 4NQO were determined using MTT cytotoxicity  
236 assay. BK3C231 did not show evidence of cytotoxicity up to 50  $\mu$ M treatment, however an  $\text{IC}_{50}$  value  
237 of 99  $\mu$ M was observed (Fig 2A). Therefore a series of BK3C231 concentrations ranging from 6.25  
238  $\mu$ M till 50  $\mu$ M was used for subsequent experiments. On the other hand, 4NQO treatment exerted no  
239 cytotoxicity at 1 hour. However, reduction in cell viability was significant with  $\text{IC}_{50}$  values observed  
240 starting from 2 hours till 24 hours (Fig 2B). Hence, 4NQO concentration at 1  $\mu$ M was selected to induce  
241 genotoxicity and mitochondrial toxicity in subsequent experiments as used by previous studies as well

242 [37,38]. Interestingly, in comparison to 4NQO-treated cells whereby cell viability greatly reduced  
243 especially at higher concentrations, BK3C231 was able to suppress 4NQO-induced cytotoxicity by  
244 increasing cell viability up to 8-fold with no IC<sub>50</sub> value observed (Fig 2C).

245

246 **Fig 2. Effect of BK3C231 and 4NQO on the viability of CCD-18Co cells as assessed by MTT**

247 **assay. (A)** Cells were treated with BK3C231 from 6.25 μM till 100 μM for 24h. An IC<sub>50</sub> value of 99

248 μM was observed. **(B)** Cells were treated with 4NQO from 3.125 μM till 50 μM for 1h (no IC<sub>50</sub> value),

249 2h (IC<sub>50</sub> value was 41 μM), 4h (IC<sub>50</sub> value was 24 μM), 12h (IC<sub>50</sub> value was 34 μM) and 24h (IC<sub>50</sub>

250 value was 13 μM). **(C)** Cells were pretreated with BK3C231 at 50 μM for 2h prior to 4NQO treatment

251 from 3.125 μM till 50 μM for subsequent 22h (no IC<sub>50</sub> value) in comparison to BK3C231-treated (no

252 IC<sub>50</sub> value) and 4NQO-treated cells (IC<sub>50</sub> value was 13 μM). Each data point was obtained from three

253 independent experimental replicates and expressed as mean ± SEM of percentage of cell viability.

254 \* p<0.05 against negative control.

255

## 256 **3.2 BK3C231 protection against 4NQO-induced DNA microlesions**

257 Significant DNA damage as indicated by the comet tail which represents DNA strand breaks can be

258 observed in cells treated only with 4NQO. Untreated control cells and BK3C231-treated cells showed

259 intact round nuclear DNA and no DNA strand break was observed at all treated concentrations (Fig

260 3A). There was also a decrease in comet tail in cells pretreated with BK3C231 when compared with

261 that of cells treated only with 4NQO (Fig 3B). This was further confirmed by quantification of tail

262 moments obtained from comet scoring. Tail moment increased significantly up to 48-fold in 4NQO-

263 treated cells at  $28.79 \pm 1.02$  (p<0.05) over control and BK3C231-treated cells ranging from  $0.59 \pm 0.11$

264 to  $0.68 \pm 0.06$  (Fig 4A). On the other hand, BK3C231 pretreatment showed a 0.8-fold decrease of

265 4NQO-induced DNA strand breaks in a concentration-dependent manner, significantly at 50 μM with

266 a tail moment value of  $7.21 \pm 0.34$  (p<0.05) (Fig 4B).

267

268 **Fig 3. DNA microlesion assessment in CCD-18Co cells using Alkaline Comet assay. (A)**

269 Fluorescence microscopic images with EtBr staining of untreated cells (i), cells treated with BK3C231  
270 at 6.25  $\mu$ M (ii), 12.5  $\mu$ M (iii), 25  $\mu$ M (iv) and 50  $\mu$ M (v) for 24h and cells treated with 4NQO at 1  $\mu$ M  
271 for 1h (vi). **(B)** Fluorescence microscopic images of untreated cells (i), cells treated with BK3C231 at  
272 6.25  $\mu$ M (ii), 12.5  $\mu$ M (iii), 25  $\mu$ M (iv) and 50  $\mu$ M (v) for 2h prior to 4NQO induction at 1  $\mu$ M for 1h  
273 and cells treated with 4NQO at 1  $\mu$ M for 1h (vi). Each data represents at least three independent  
274 experimental replicates.

275

276 **Fig 4. Tail moments obtained from comet scoring in CCD-18Co cells. (A)** Screening for DNA

277 damage expressed as tail moment in cells treated respectively with BK3C231 from 6.25  $\mu$ M till 50  $\mu$ M  
278 for 24h and 4NQO at 1  $\mu$ M for 1h. **(B)** Cells were pretreated with BK3C231 from 6.25  $\mu$ M till 50  $\mu$ M  
279 for 2h prior to 4NQO induction at 1  $\mu$ M for 1h. Each data point was obtained from three independent  
280 experimental replicates and expressed as mean  $\pm$  SEM of tail moment. \*  $p < 0.05$  against negative control,  
281 CON (A) and #  $p < 0.05$  against positive control, 4NQO only (B).

282

### 283 **3.3 Inhibition of 4NQO-induced DNA macrolesions by BK3C231**

284 The protective role of BK3C231 against 4NQO-induced micronucleus formation was assessed using  
285 CBMN assay. In untreated control cells, a micronucleus frequency level as low as  $0.23 \pm 0.03$  was  
286 observed. Cells treated with 4NQO significantly demonstrated up to 93-fold increase in frequency of  
287 micronucleus in binucleated cells at  $21.56 \pm 1.36$  ( $p < 0.05$ ). However, pretreatment of cells with  
288 BK3C231 was shown to cause a maximum of 0.8 fold decrease of 4NQO-induced micronucleus  
289 formation in a concentration-dependent manner, significantly at 25  $\mu$ M with a frequency level of  $6.58$   
290  $\pm 0.52$  and 50  $\mu$ M with a frequency level of  $3.80 \pm 0.47$  ( $p < 0.05$ ) (Fig 5B). In addition, the NDI values  
291 measured in control, 4NQO-treated cells and BK3C231-treated cells were  $1.78 \pm 0.01$ ,  $1.68 \pm 0.03$  and

292 1.79 ± 0.01 respectively. As for cells pretreated with BK3C231 prior to 4NQO induction, the average  
293 NDI value measured was 1.72 ± 0.01 (data not shown). All NDI values obtained in this assay indicated  
294 normal cell proliferation [39].

295

296 **Fig 5. DNA macrolesion assessment in CCD-18Co cells using CBMN assay. (A)** Fluorescence  
297 microscopic images with acridine orange staining of mononucleated cell (i), binucleated cell (ii) and  
298 binucleated cell with micronucleus (iii). Cellular nucleus was stained green while cytoplasm was  
299 stained orange in this assay. **(B)** Cells were pretreated with BK3C231 from 6.25 µM till 50 µM for 2h  
300 prior to 4NQO induction at 1 µM for 2h. Each data point was obtained from three independent  
301 experimental replicates and expressed as mean ± SEM of frequency of micronucleus in binucleated  
302 cells. \* p<0.05 against positive control, 4NQO only.

303

### 304 **3.4 Cytoprotective role of BK3C231 in 4NQO-induced loss of** 305 **mitochondrial membrane potential ( $\Delta\Psi_m$ )**

306 The cytoprotective role of BK3C231 was further investigated at the mitochondrial level through flow  
307 cytometric assessment of  $\Delta\Psi_m$  loss using TMRE staining. Significant loss of  $\Delta\Psi_m$  (p<0.05) as  
308 indicated by a 1.2-fold increase of TMRE-negative cells from 15.63 ± 1.09 % in control cells to 34.77  
309 ± 1.29 % in 4NQO-treated cells was observed. However, BK3C231 pretreatment was shown to reduce  
310 the amount of TMRE-negative cells significantly to 22.13 ± 2.51 % (p<0.05) at 50 µM, thereby  
311 protecting the cells against 4NQO-induced  $\Delta\Psi_m$  loss (Fig 6).

312

313 **Fig 6. Flow cytometric assessment of  $\Delta\Psi_m$  level using TMRE staining.** Cells were pretreated with  
314 BK3C231 from 6.25 µM till 50 µM for 2h prior to 4NQO induction at 1 µM for 2h. Each data point

315 was obtained from three independent experimental replicates and expressed as mean  $\pm$  SEM of TMRE-  
316 negative cells (%). \*  $p < 0.05$  against positive control, 4NQO only.

317

### 318 **3.5 Suppression of 4NQO-induced cardiolipin loss by BK3C231**

319 In a bid to further establish the protective role of BK3C231 in mitochondria, cardiolipin level was  
320 assessed through flow cytometric analysis using NAO staining. Our study demonstrated significant  
321 cardiolipin loss ( $p < 0.05$ ) as indicated by a 2.8-fold increase of NAO-negative cells from  $5.07 \pm 0.52$  %  
322 in control cells to  $19.33 \pm 0.94$  % in 4NQO-treated cells. However, BK3C231 pretreatment was shown  
323 to induce up to 0.4-fold decrease of 4NQO-induced cardiolipin loss in a concentration-dependent  
324 manner (Fig 7).

325

326 **Fig 7. Flow cytometric assessment of cardiolipin level using NAO staining.** Cells were pretreated  
327 with BK3C231 from 6.25  $\mu$ M till 50  $\mu$ M for 2h prior to 4NQO induction at 1  $\mu$ M for 2h. Each data  
328 point was obtained from three independent experimental replicates and expressed as mean  $\pm$  SEM of  
329 NAO-negative cells (%). \*  $p < 0.05$  against positive control, 4NQO only.

330

### 331 **3.6 4NQO-induced DNA and mitochondrial damages independent of**

#### 332 **ROS production**

333 Flow cytometric assessment of ROS namely superoxide and hydrogen peroxide levels using HE and  
334 DCFH-DA staining was performed to determine the role of ROS in 4NQO-induced DNA and  
335 mitochondrial damages. Interestingly, as shown in Fig 8A-B, there were no inductions of superoxide  
336 and hydrogen peroxide levels in 4NQO-treated cells as compared to control cells. Hydroquinone (HQ),  
337 which was used as positive control, had significantly increased ROS level in CCD-18Co cells ( $p < 0.05$ ).  
338 This suggested that ROS was not involved in DNA and mitochondrial damages caused by 4NQO.

339

340 **Fig 8. Flow cytometric assessment of superoxide level using HE staining (A) and hydrogen**  
341 **peroxide level using DCFH-DA staining (B).** Cells were treated with 4NQO at 1  $\mu$ M for 1h. HQ  
342 treatment at 50  $\mu$ M for 2h was used as positive control in this assay. Each data point was obtained from  
343 three independent experimental replicates and expressed as mean  $\pm$  SEM of percentage of HE- or DCF-  
344 stained cells. \*  $p < 0.05$  against negative control, CON.

345

### 346 **3.7 Inhibition of 4NQO-induced nitrosative stress by BK3C231**

347 Intracellular nitric oxide (NO) level was assessed using BD Pharmingen™ Orange NO Probe staining  
348 whereas extracellular NO level was assessed using Griess assay to determine the involvement of RNS  
349 in 4NQO-induced DNA and mitochondrial damages. Our study demonstrated a significant 0.98-fold  
350 increase of intracellular NO level,  $15.7 \pm 0.19$  % and 2.4-fold increase of extracellular NO level,  $5.15$   
351  $\pm 0.17$   $\mu$ M ( $p < 0.05$ ) in 4NQO-treated cells over control cells, at  $7.63 \pm 0.19$  % and  $1.51 \pm 0.26$   $\mu$ M  
352 respectively, thereby demonstrating the involvement of NO in 4NQO-induced DNA and mitochondrial  
353 damages. Moreover, BK3C231 significantly inhibited 4NQO-induced NO production from as early as  
354 2 hours up till 24 hours of pretreatment ( $p < 0.05$ ) (Fig 9A,B). In addition to that, antioxidant GSH level  
355 was assessed using Ellman's reagent. 4NQO-treated cells showed a reduced GSH level at  $194.70 \pm$   
356  $23.83$  nmol/mg as compared to untreated control cells at  $245.96 \pm 12.44$  nmol/mg (Fig 9C). Overall,  
357 the simultaneous increase in NO level and decrease in GSH level by 4NQO further confirmed the  
358 involvement of nitrosative stress in 4NQO-induced DNA and mitochondrial damages. However, no  
359 induction of GSH level was observed in cells pretreated with BK3C231 for 2 hours, 4 hours, 6 hours  
360 and 12 hours. BK3C231 was only able to significantly increase GSH level,  $313.97 \pm 27.83$  nmol/mg  
361 ( $p < 0.05$ ) at 24 hours of pretreatment as compared to that of 4NQO-treated cells (Fig 9C). This  
362 suggested that BK3C231 inhibited 4NQO-induced nitrosative stress through early reduction of NO  
363 production and late induction of GSH level in CCD-18Co cells.



364

365 **Fig 9. Nitrosative stress assessment through determination of intracellular NO level using**  
366 **Orange NO probe staining (A), extracellular NO level using Griess assay (B) and GSH level using**  
367 **Ellman's reagent (C) in CCD-18Co cells.** Cells were pretreated with BK3C231 at 50  $\mu$ M for 2h, 4h,  
368 6h, 12h and 24h prior to 4NQO induction at 1  $\mu$ M for 1h. Each data point was obtained from three  
369 independent experimental replicates and expressed as mean  $\pm$  SEM of NO level and concentration of  
370 free thiol. \*  $p < 0.05$  against positive control, 4NQO only.

371

## 372 **4. Discussion**

373 Epidemiological studies have shown that consumption of fruits particularly rich in stilbenes led to a  
374 reduced risk of colorectal cancer, which is one of the most commonly diagnosed cancer worldwide  
375 [40,41]. Furthermore, cytoprotection of DNA and mitochondrial function limits the occurrence of  
376 cancer. Since DNA is the repository of hereditary material and genetic information in every living cell,  
377 the maintenance of its stability is pivotal as unrepaired DNA damages caused by diverse assaults from  
378 the environment, nutrition and natural cellular processes lead to cancer [42,43]. As for mitochondria,  
379 impairments and alterations of mitochondrial structure and functions, including morphology and redox  
380 potential, are associated with cancer transformation and have been frequently reported in human  
381 cancers [44-46]. In agreement with this, our study showed that BK3C231 was able to inhibit 4NQO-  
382 induced cytotoxicity as well as protect against DNA damage and mitochondrial dysfunction in the  
383 normal human colon fibroblast CCD-18Co cell line.

384 Firstly, we sought to understand the carcinogenic actions of 4NQO. Studies have demonstrated  
385 that 4NQO elicited carcinogenicity through its proximate carcinogenic metabolite namely 4-  
386 hydroxyaminoquinoline 1-oxide (4HAQO) produced by the enzymatic four-electron reduction of  
387 4NQO's nitro group [47,48]. Being a potent chemical carcinogen and as a UV-mimetic agent, 4NQO



388 is often used as positive control in various genotoxicity studies due to its well characterized metabolic  
389 processes [49]. Though a study by Brüsehafer et al. [50] reported that 4NQO predominantly induces  
390 mutagenicity more than clastogenicity and that the latter depends on cell types, our study has proved  
391 that 4NQO significantly caused DNA damage via DNA strand breaks and chromosomal damage via  
392 micronucleus formation. Also, our study was in agreement with previous studies which demonstrated  
393 that 4NQO caused damage to mitochondrial membrane as characterized by loss of mitochondrial  
394 membrane potential ( $\Delta\Psi_m$ ) and cardiolipin [51].

395 As 4HAQO's carcinogenic effect is mainly based on DNA adduct formation, our study  
396 investigated 4NQO's other carcinogenic mechanism of action through generation of ROS and RNS and  
397 its involvement in the cytoprotective role of BK3C231 [52-54]. Interestingly, our study which revealed  
398 no superoxide and hydrogen peroxide production by 4NQO at 1  $\mu$ M for 1 hour in CCD-18Co cells  
399 contradicts the study by Arima et al. [37] which reported ROS formation in human primary skin  
400 fibroblast by 4NQO using the same treatment concentration and timepoint. The discrepancy is likely  
401 due to the difference in the origin of fibroblast used. Hence, our study is the first to elucidate such  
402 findings on 4NQO mechanism which has never been shown in other studies thus far.

403 In addition, our study demonstrated an increased NO level and a depleted GSH level by 4NQO.  
404 This is possibly due to formation of 4NQO-GSH conjugates leading to generation of nitrite, a stable  
405 end product of NO, which inactivated  $\gamma$ -glutamylcysteine synthase and therefore suppressed  
406 intracellular synthesis of GSH [37,54-56]. Our data was also in agreement with previous studies that  
407 NO could be the main culprit in 4NQO-induced DNA and mitochondrial damages in CCD-18Co cells  
408 as NO has been demonstrated to induce genotoxicity and damage to mitochondria via multiple  
409 mechanisms directly or indirectly [57,58]. NO also plays an important role in tumour biology and  
410 overproduction of NO can promote tumour growth [59]. Moreover, the concurrent increase in NO level  
411 and decrease in GSH level postulates the occurrence of nitrosative stress which may contribute to  
412 4NQO-induced DNA and mitochondrial damages [60,61].

413 More importantly, BK3C231 was shown in our study to protect against 4NQO-induced DNA  
414 and mitochondrial damages by decreasing DNA strand breaks and micronucleus formation as well as  
415 reducing loss of mitochondrial membrane potential ( $\Delta\Psi_m$ ) and cardiolipin. Our study further revealed  
416 that BK3C231 exerted these cytoprotective effects in CCD-18Co cells by suppressing 4NQO-induced  
417 nitrosative stress through reduction in NO level and late upregulation of GSH level. The role of stilbene  
418 derivatives as potential antioxidants has been a conventional fact proven by many studies such as  
419 resveratrol, a well-known stilbenoid, attenuated nitrosative stress in small intestine of rats [62].  
420 Piceatannol and isorhapontigenin, which are natural occurring stilbenes, have also been demonstrated  
421 to scavenge NO and nitrogen dioxide (NO<sub>2</sub>) radicals as well as increasing GSH/GSSG ratio [63,64].

422 Kee et al. [36] has reported chemopreventive activity of BK3C231 involving upregulation of  
423 detoxifying enzyme NQO1 due to the presence of methoxy group and furan carboxamide. Therefore,  
424 it is possible that the depletion of NO level is mediated directly by BK3C231 most likely due to the  
425 presence of methoxy group that enables BK3C231 to act as free radical scavenger which donates  
426 electron to scavenge NO. Besides that, the upstream Keap1-Nrf2 signaling pathway, which is a major  
427 regulator of phase II detoxification and cytoprotective genes, is postulated to be involved through  
428 upregulation of detoxifying enzymes which may lead to NO suppression. Stilbene derivatives  
429 particularly resveratrol have been playing substantial role in activation of Nrf2-related gene  
430 transcription which induces expression of cytoprotective enzymes such as NQO1, glutathione S-  
431 transferase (GST), glutamate-cysteine ligase catalytic subunit (GCLC) and heme oxygenase-1 (HO-1)  
432 thus leading to protection against cancer [65]. Therefore, our study warrants further investigation on  
433 the role of BK3C231 in the Keap1-Nrf2 pathway.

434

435

436

437

## 438 **5. Conclusion**

439 In conclusion, this study has provided a better insight into 4NQO-induced carcinogenicity in CCD-  
440 18Co cells. Our findings also served as a stepping stone for further elucidation of BK3C231  
441 chemopreventive potential against both genetic and epigenetic bases of cancer development. Through  
442 these findings, we aim to design BK3C231 as an ideal chemopreventive agent in hopes of reducing the  
443 gap between understanding molecular mechanism occurring in cancer carcinogenesis and instigating  
444 successful adoption of chemoprevention.

445

446 **Fig 10. Schematic representation of BK3C231-induced cytoprotection against 4NQO damage in**  
447 **CCD-18Co human colon fibroblast cells.** 4NQO caused DNA strand breaks and micronucleus  
448 formation as well as mitochondrial membrane potential ( $\Delta\Psi_m$ ) and cardiolipin losses in CCD-18Co  
449 cells through NO formation. BK3C231 inhibited these 4NQO-induced DNA and mitochondrial  
450 damages by decreasing NO level and increasing GSH level.

451

## 452 **Acknowledgements**

453 The authors would like to thank Dr. Kee Chin Hui from Department of Chemistry, Faculty of Science,  
454 University of Malaya for her contribution in the synthesis of compound BK3C231.

455

## 456 **Author contributions**

457 **Conceptualization:** Kok Meng Chan

458 **Data Curation:** Huan Huan Tan

459 **Formal Analysis:** Huan Huan Tan

460 **Funding Acquisition:** Kok Meng Chan

461 **Investigation:** Huan Huan Tan

462 **Methodology:** Kok Meng Chan, Huan Huan Tan

463 **Project Administration:** Kok Meng Chan, Huan Huan Tan

464 **Resources:** Kok Meng Chan, Noel F. Thomas, Salmaan H. Inayat-Hussain

465 **Supervision:** Kok Meng Chan, Noel F. Thomas, Salmaan H. Inayat-Hussain

466 **Validation:** Huan Huan Tan, Kok Meng Chan

467 **Visualization:** Huan Huan Tan

468 **Writing – Original Draft Preparation:** Huan Huan Tan

469 **Writing – Review & Editing:** Huan Huan Tan, Kok Meng Chan

470

## 471 **References**

- 472 1. Kuipers EJ, Rösch T, Bretthauer M. Colorectal cancer screening-optimizing current strategies  
473 and new directions. *Nat Rev Clin Oncol.* 2013; 10(3):130-142. doi: 10.1038/nrclinonc.2013.12  
474 PMID: 23381005
- 475 2. Saracci R, Wild CP. International Agency for Research on Cancer: the first 50 years, 1965-  
476 2015. Lyon (France): International Agency for Research on Cancer; 2015.
- 477 3. Manan AA, Ibrahim Tamin NS, Abdullah NH, Abidin AZ, Wahab M 2016. Malaysian National  
478 Cancer Registry Report 2007-2011: Malaysia Cancer Statistics, Data and Figure. National  
479 Cancer Institute, Ministry of Health Malaysia. 2016; 1-202.
- 480 4. Penny LK, Wallace HM. The challenges for cancer chemoprevention. *Chem Soc Rev.* 2015;  
481 44(24):8836-8847. doi: 10.1039/c5cs00705d PMID: 26595684
- 482 5. Kuipers EJ, Grady WM, Lieberman D, Seufferlein T, Sung JJ, Boelens PG, et al. Colorectal  
483 cancer. *Nat Rev Dis Primers.* 2015; 1:15065. doi: 0.1038/nrdp.2015.65 PMID: 27189416

- 484 6. Van Gijn W, Marijnen CA, Nagtegaal ID, Kranenbarg EM, Putter H, Wiggers T, et al.  
485 Preoperative radiotherapy combined with total mesorectal excision for resectable rectal cancer:  
486 12-year follow-up of the multicentre, randomised controlled TME trial. *Lancet Oncol.* 2011;  
487 12(6):575-582. doi: 10.1016/S1470-2045(11)70097-3 PMID: 21596621
- 488 7. Van Cutsem E, Tabernero J, Lakomy R, Prenen H, Prausová J, Macarulla T, et al. Addition of  
489 aflibercept to fluorouracil, leucovorin, and irinotecan improves survival in a phase III  
490 randomized trial in patients with metastatic colorectal cancer previously treated with an  
491 oxaliplatin-based regimen. *J Clin Oncol.* 2012; 30(28):3499-3506. doi:  
492 10.1200/JCO.2012.42.8201 PMID: 22949147
- 493 8. Kapse-Mistry S, Govender T, Srivastava R, Yergeri M. Nanodrug delivery in reversing  
494 multidrug resistance in cancer cells. *Front Pharmacol.* 2014; 5:159. doi:  
495 10.3389/fphar.2014.00159 PMID: 25071577
- 496 9. Sporn MB, Suh NJ. Chemoprevention: an essential approach to controlling cancer. *Nat Rev*  
497 *Cancer.* 2002; 2(7): 537-543. doi: 10.1038/nrc844 PMID: 12094240
- 498 10. Surh YJ, Na HK. NF- $\kappa$ B and Nrf2 as prime molecular targets for chemoprevention and  
499 cytoprotection with anti-inflammatory and antioxidant phytochemicals. *Genes Nutr.* 2008; 2(4):  
500 313-317. doi: 10.1007/s12263-007-0063-0 PMID: 18850223
- 501 11. Navasiyam N. Chemoprevention in experimental animals. *Ann NY Acad Sci.* 2011; 1215: 60-  
502 71. doi: 10.1111/j.1749-6632.2010.05873.x PMID: 21261642
- 503 12. Shrotriya S, Agarwal R, Sclafani RA. A perspective on chemoprevention by resveratrol in head  
504 and neck squamous cell carcinoma. *Adv Exp Med Biol.* 2015; 815: 333-348. doi: 10.1007/978-  
505 3-319-09614-8\_19 PMID: 25427916
- 506 13. Barcellos-Hoff MH, Lyden D, Wang TC. The evolution of the cancer niche during multistage  
507 carcinogenesis. *Nat Rev Cancer.* 2013; 13(7): 511-518. doi: 10.1038/nrc3536 PMID: 23760023

- 508 14. Kotecha R, Takami A, Luis Espinoza J. Dietary phytochemicals and cancer chemoprevention:  
509 a review of the clinical evidence. *Oncotarget*. 2016; 7(32): 52517-52529. doi:  
510 10.18632/oncotarget.9593 PMID: 27232756
- 511 15. Marra M, Sordelli IM, Lombardi A, Lamberti M, Tarantino L, Giudice A, et al. Molecular  
512 targets and oxidative stress biomarkers in hepatocellular carcinoma: an overview. *J Transl Med*.  
513 2011; 9(171): 1-14. doi: 10.1186/1479-5876-9-171 PMID: 21985599
- 514 16. Kurutas EB. The importance of antioxidants which play the role in cellular response against  
515 oxidative/nitrosative stress: current state. *Nutr J*. 2016; 15(71): 1-22. doi: 10.1186/s12937-016-  
516 0186-5 PMID: 27456681
- 517 17. Dröge W. Free radicals in the physiological control of cell function. *Physiol Rev*. 2002; 82(1):  
518 47-95. doi: 10.1152/physrev.00018.2001 PMID: 11773609
- 519 18. Kruk J, Aboul-Enein HY. Reactive oxygen and nitrogen species in carcinogenesis: Implications  
520 of oxidative stress on the progression and development of several cancer types. *Mini Rev Med*  
521 *Chem*. 2017; 17(11): 904-919. doi: 10.2174/1389557517666170228115324 PMID: 28245782
- 522 19. Langcake P, Pryce RJ. A new class of phytoalexins from grapevines. *Experientia*. 1977; 33(2):  
523 151-152. doi: 10.1007/bf02124034 PMID: 844529
- 524 20. Chen RS, Wu PL, Chiou RYY. Peanut roots as a source of resveratrol. *J Agric Food Chem*.  
525 2002; 50(6): 1665-1667. doi: 10.1021/jf011134e PMID: 11879054
- 526 21. Parage C, Tavares R, Rety S, Baltenweck-Guyot R, Poutaraud A, Renault L, et al. Structural,  
527 functional, and evolutionary analysis of the unusually large stilbene synthase gene family in  
528 grapevine. *Plant Physiol*. 2012; 160(3): 1407-1419. doi: 10.1104/pp.112.202705 PMID:  
529 22961129
- 530 22. Hart JH, Shrimpton DM. Role of stilbenes in resistance of wood to decay. *Phytopathology*.  
531 1979; 69: 1138-1143.

- 532 23. King RE, Bomser JA, Min DB. Bioactivity of resveratrol. *Compr Rev Food Sci Food Safety*.  
533 2006; 5: 65-70. doi: 10.1111/j.1541-4337.2006.00001.x
- 534 24. Watts KT, Lee PC, Schmidt-Dannert C. Biosynthesis of plant-specific stilbene polyketides in  
535 metabolically engineered *Escherichia coli*. *BMC Biotechnol*. 2006; 6:22. doi: 10.1186/1472-  
536 6750-6-22 PMID: 16551366
- 537 25. Inayat-Hussain SH, Thomas NF. Recent advances in the discovery and development of stilbenes  
538 and lactones in anticancer therapy. *Expert Opin Ther Pat*. 2004; 14(6): 819-835. doi:  
539 10.1517/13543776.14.6.819
- 540 26. Jang MS, Cai LN, Udeani GO, Slowing KV, Thomas CF, Beecher CWW, et al. Cancer  
541 chemopreventive activity of resveratrol, a natural product derived from grapes. *Science*. 1997;  
542 275(5297): 218-220. doi: 10.1126/science.275.5297.218 PMID: 8985016
- 543 27. Bhat KPL, Pezzuto JM. Cancer chemopreventive activity of resveratrol. *Ann N Y Acad Sci*.  
544 2002; 957: 210-229. doi: 10.1111/j.1749-6632.2002.tb02918.x PMID: 12074974
- 545 28. Howitz KT, Bitterman KJ, Cohen HY, Lamming DW, Lavu S, Wood JG, et al. Small molecule  
546 activators of sirtuins extend *Saccharomyces cerevisiae* lifespan. *Nature*. 2003; 425(6954): 191-  
547 196. doi: 10.1038/nature01960 PMID: 12939617
- 548 29. Mahady GB, Pendland SL, Chadwick LR. Resveratrol and red wine extracts inhibit the growth  
549 of CagA+ strains of *Helicobacter pylori* in vitro. *Am J Gastroenterol*. 2003; 98(6): 1440-1441.  
550 doi: 10.1111/j.1572-0241.2003.07513.x PMID: 12818294
- 551 30. Olson ER, Naugle JE, Zhang X, Bomser JA, Meszaros JG. Inhibition of cardiac fibroblast  
552 proliferation and myofibroblast differentiation by resveratrol. *Am J Physiol Heart Circ*  
553 *Physiol*. 2005; 288(3): 1131-1138. doi: 10.1152/ajpheart.00763.2004 PMID: 15498824
- 554 31. Su HC, Hung LM, Chen JK. Resveratrol, a red wine antioxidant, possesses an insulin-like effect  
555 in streptozotocin induced diabetic rats. *Am J Physiol Endocrinol Metab*. 2006; 290(6): 1339-  
556 1346. doi: 10.1152/ajpendo.00487.2005 PMID: 16434553

- 557 32. Gomez-Zorita S, Tréguer K, Mercader J, Carpéné C. Resveratrol directly affects in vitro  
558 lipolysis and glucose transport in human fat cells. *J Physiol Biochem.* 2013; 69(3): 585-593.  
559 doi: 10.1007/s13105-012-0229-0 PMID: 23315205
- 560 33. Zhou ZX, Mou SF, Chen XQ, Gong LL, Ge WS. Anti-inflammatory activity of resveratrol  
561 prevents inflammation by inhibiting NF- $\kappa$ B in animal models of acute pharyngitis. *Mol Med*  
562 *Rep.* 2018; 17(1): 1269-1274. doi: 10.3892/mmr.2017.7933 PMID: 29115472
- 563 34. Aggarwal BB, Bhardwaj A, Aggarwal RS, Seeram NP, Shishodia S, Takada Y. Role of  
564 resveratrol in prevention and therapy of cancer: Preclinical and clinical studies. *Anticancer Res.*  
565 2004; 24(5A): 2783-2840. PMID: 15517885
- 566 35. Walle T, Hsieh F, DeLegge MH, Oatis JE Jr, Walle UK. High absorption but very low  
567 bioavailability of oral resveratrol in humans. *Drug Metab Dispos.* 2004; 32(12): 1377-1382.  
568 doi: 10.1124/dmd.104.000885 PMID: 15333514
- 569 36. Kee CH, Ariffin A, Awang K, Takeya K, Morita H, Hussain SI, et al. Challenges associated  
570 with the synthesis of unusual *o*-carboxamido stilbenes by the Heck protocol: Intriguing  
571 substituent effects, their toxicological and chemopreventive implications. *Org Biomol Chem.*  
572 2010; 8(24): 5646-5660. doi: 10.1039/c0ob00296h PMID:20941451
- 573 37. Arima Y, Nishigori C, Takeuchi T, Oka S, Morimoto K, Utani A, et al. 4-Nitroquinoline 1-  
574 oxide forms 8-hydroxydeoxyguanosine in human fibroblasts through reactive oxygen species.  
575 *Toxicol Sci.* 2006; 91(2): 382-392. doi: 10.1093/toxsci/kfj161 PMID: 16547075
- 576 38. Lan A, Li W, Liu Y, Xiong Z, Zhang X, Zhou S, et al. Chemoprevention of oxidative stress-  
577 associated oral carcinogenesis by sulforaphane depends on NRF2 and the isothiocyanate  
578 moiety. *Oncotarget.* 2016; 7(33): 53502-53514. doi: 10.18632/oncotarget.10609 PMID:  
579 27447968



- 580 39. Ionescu ME, Ciocirlan M, Becheanu G, Nicolaie T, Ditescu C, Teiusanu AG, et al. Nuclear  
581 division index may predict neoplastic colorectal lesions. *Maedica (Buchar)*. 2011; 6(3): 173-  
582 178. PMID: 22368693
- 583 40. Donaldson MS. Nutrition and cancer: A review of the evidence for an anti-cancer diet. *Nutr J*.  
584 2004; 3: 19. doi: 10.1186/1475-2891-3-19 PMID:15496224
- 585 41. Rimando AM, Suh N. Biological/Chemopreventive activity of stilbenes and their effect on  
586 colon cancer. *Planta Med*. 2008; 74(13): 1635-1643. doi: 10.1055/s-0028-1088301  
587 PMID:18843589
- 588 42. Clancy S. DNA Damage & Repair: Mechanisms for Maintaining DNA Integrity. *Nature*  
589 *Education*. 2008; 1(1): 103.
- 590 43. McKenna DJ, McKeown SR, McKelvey-Martin VJ. Potential use of the comet assay in the  
591 clinical management of cancer. *Mutagenesis*. 2008; 23(3): 183-190. doi:  
592 10.1093/mutage/gem054 PMID:18256034
- 593 44. Wallace DC. A mitochondrial paradigm of metabolic and degenerative diseases, aging, and  
594 cancer: a dawn for evolutionary medicine. *Annu Rev Genet*. 2005; 39: 359-407. doi:  
595 10.1146/annurev.genet.39.110304.095751 PMID: 16285865
- 596 45. Alirol E, Martinou JC. Mitochondria and cancer: is there a morphological connection?  
597 *Oncogene*. 2006; 25(34): 4706-4716. doi: 10.1038/sj.onc.1209600 PMID: 16892084
- 598 46. Tokarz P, Blasiak J. Role of mitochondria in carcinogenesis. *Acta Biochim Pol*. 2014;  
599 61(4):671-678. PMID: 25493442
- 600 47. Nagao M, Sugimura T. Molecular biology of the carcinogen, 4-nitroquinoline 1-oxide. *Adv*  
601 *Cancer Res*. 1976; 23: 131-169. PMID: 818888
- 602 48. Kitano M. Host genes controlling the susceptibility and resistance to squamous cell carcinoma  
603 of the tongue in a rat model. *Pathol Int*. 2000; 50(5): 353-362. doi: 10.1046/j.1440-  
604 1827.2000.01058.x PMID: 10849324

- 605 49. Tice RR, Agurell E, Anderson D, Burlinson B, Hartmann A, Kobayashi H, et al. Single Cell  
606 Gel/Comet Assay: Guidelines for In Vitro and In Vivo Genetic Toxicology Testing. *Environ*  
607 *Mol Mutagen*. 2000; 35(3): 206-221. PMID: 10737956
- 608 50. Brüsehafer K, Manshian BB, Doherty AT, Zair ZM, Johnson GE, Doak SH, et al. The  
609 clastogenicity of 4NQO is cell-type dependent and linked to cytotoxicity, length of exposure  
610 and p53 proficiency. *Mutagenesis*. 2016; 31(2): 171-180. doi: 10.1093/mutage/gev069 PMID:  
611 26362870
- 612 51. Han H, Pan Q, Zhang B, Li J, Deng X, Lian Z, et al. 4NQO induced apoptosis via p53-dependent  
613 mitochondrial signaling pathway. *Toxicology*. 2007; 230(2-3): 151-163. doi:  
614 10.1016/j.tox.2006.11.045 PMID: 17169477
- 615 52. Tada M. Seryl-tRNA synthetase and activation of the carcinogen 4-nitroquinoline 1-oxide.  
616 *Nature*. 1975; 255(5508): 510-512. doi: 10.1038/255510a0 PMID: 166317
- 617 53. Kohda K, Kawazoe Y, Minoura Y, Tada M. Separation and identification of N4-(guanosin-7-  
618 yl)-4-aminoquinoline 1-oxide, a novel nucleic acid adduct of carcinogen 4-nitroquinoline 1-  
619 oxide. *Carcinogenesis*. 1991; 12(8): 1523-1525. doi: 10.1093/carcin/12.8.1523 PMID: 1907226
- 620 54. Nunoshiba T, Demple B. Potent intracellular oxidative stress exerted by the carcinogen 4-  
621 nitroquinoline-N-oxide. *Cancer Res*. 1993; 53(14): 3250-3252. PMID: 8391920
- 622 55. Stanley JS, Benson AM. The conjugation of 4-nitroquinoline 1-oxide, a potent carcinogen, by  
623 mammalian glutathione transferases. 4-Nitroquinoline 1-oxide conjugation by human, rat and  
624 mouse liver cytosols, extrahepatic organs of mice and purified mouse glutathione transferase  
625 isoenzymes. *Biochem J*. 1988; 256(1): 303-306. doi: 10.1042/bj2560303 PMID: 3146973
- 626 56. Han J, Stamler JS, Li HL, Griffith OW. Inhibition of gamma-glutamylcysteine synthetase by S-  
627 nitrosylation. *Biology of Nitric Oxide*. 1996; 5: 114.

- 628 57. Burney S, Caulfield JL, Niles JC, Wishnok JS, Tannenbaum SR. The chemistry of DNA damage  
629 from nitric oxide and peroxynitrite. *Mutat Res.* 1999; 424(1-2): 37-49. doi: 10.1016/s0027-  
630 5107(99)00006-8 PMID: 10064848
- 631 58. Li CQ, Trudel LJ, Wogan GN. Nitric oxide-induced genotoxicity, mitochondrial damage, and  
632 apoptosis in human lymphoblastoid cells expressing wild-type and mutant p53. *PNAS.* 2002;  
633 99(16): 10364-10369. doi: 10.1073/pnas.162356399
- 634 59. Sawicka E, Lisowska A, Kowal P, Długosz A. The role of oxidative stress in bladder cancer.  
635 *Postepy Hig Med Dosw.* 2015; 69: 744-752. doi: 10.5604/17322693.1160361 PMID:  
636 26206990
- 637 60. Squadrito GL, Pryor WA. Oxidative chemistry of nitric oxide: The roles of superoxide,  
638 peroxynitrite, and carbon dioxide. *Free Radic Biol Med.* 1998; 25(4-5): 392-403. doi:  
639 10.1016/s0891-5849(98)00095-1 PMID: 9741578
- 640 61. Zhao J. Interplay among nitric oxide and reactive oxygen species. A complex network  
641 determining cell survival or death. *Plant Signal Behav.* 2007; 2(6): 544-547. doi:  
642 10.4161/psb.2.6.4802 PMID: 19704554
- 643 62. Ferreira PEB, Beraldi EJ, Borges SC, Natali MRM, Buttow NC. Resveratrol promotes  
644 neuroprotection and attenuates oxidative and nitrosative stress in the small intestine in diabetic  
645 rats. *Biomed Pharmacother.* 2018; 105: 724-733. doi: 10.1016/j.biopha.2018.06.030 PMID:  
646 29906751
- 647 63. Yokozawa T, Kim YJ. Piceatannol inhibits melanogenesis by its antioxidative actions. *Biol*  
648 *Pharm Bull.* 2007; 30(11): 2007-2011. doi: 10.1248/bpb.30.2007 PMID: 17978467
- 649 64. Lu Y, Wang A, Shi P, Zhang H. A Theoretical Study on the Antioxidant Activity of Piceatannol  
650 and Isorhapontigenin Scavenging Nitric Oxide and Nitrogen Dioxide Radicals. *PLoS One.*  
651 2017; 12(1): e0169773. doi: 10.1371/journal.pone.0169773 PMID: 28068377

652 65. Thiel G, Rossler OG. Resveratrol regulates gene transcription via activation of stimulus-  
653 responsive transcription factors. *Pharmacol Res.* 2017; 117: 166-176. doi:  
654 10.1016/j.phrs.2016.12.029 PMID: 28012964

655

656

657

658

bioRxiv preprint doi: <https://doi.org/10.1101/777193>; this version posted September 20, 2019. The copyright holder for this preprint (which was not certified by peer review) is the author/funder, who has granted bioRxiv a license to display the preprint in perpetuity. It is made available under aCC-BY 4.0 International license.

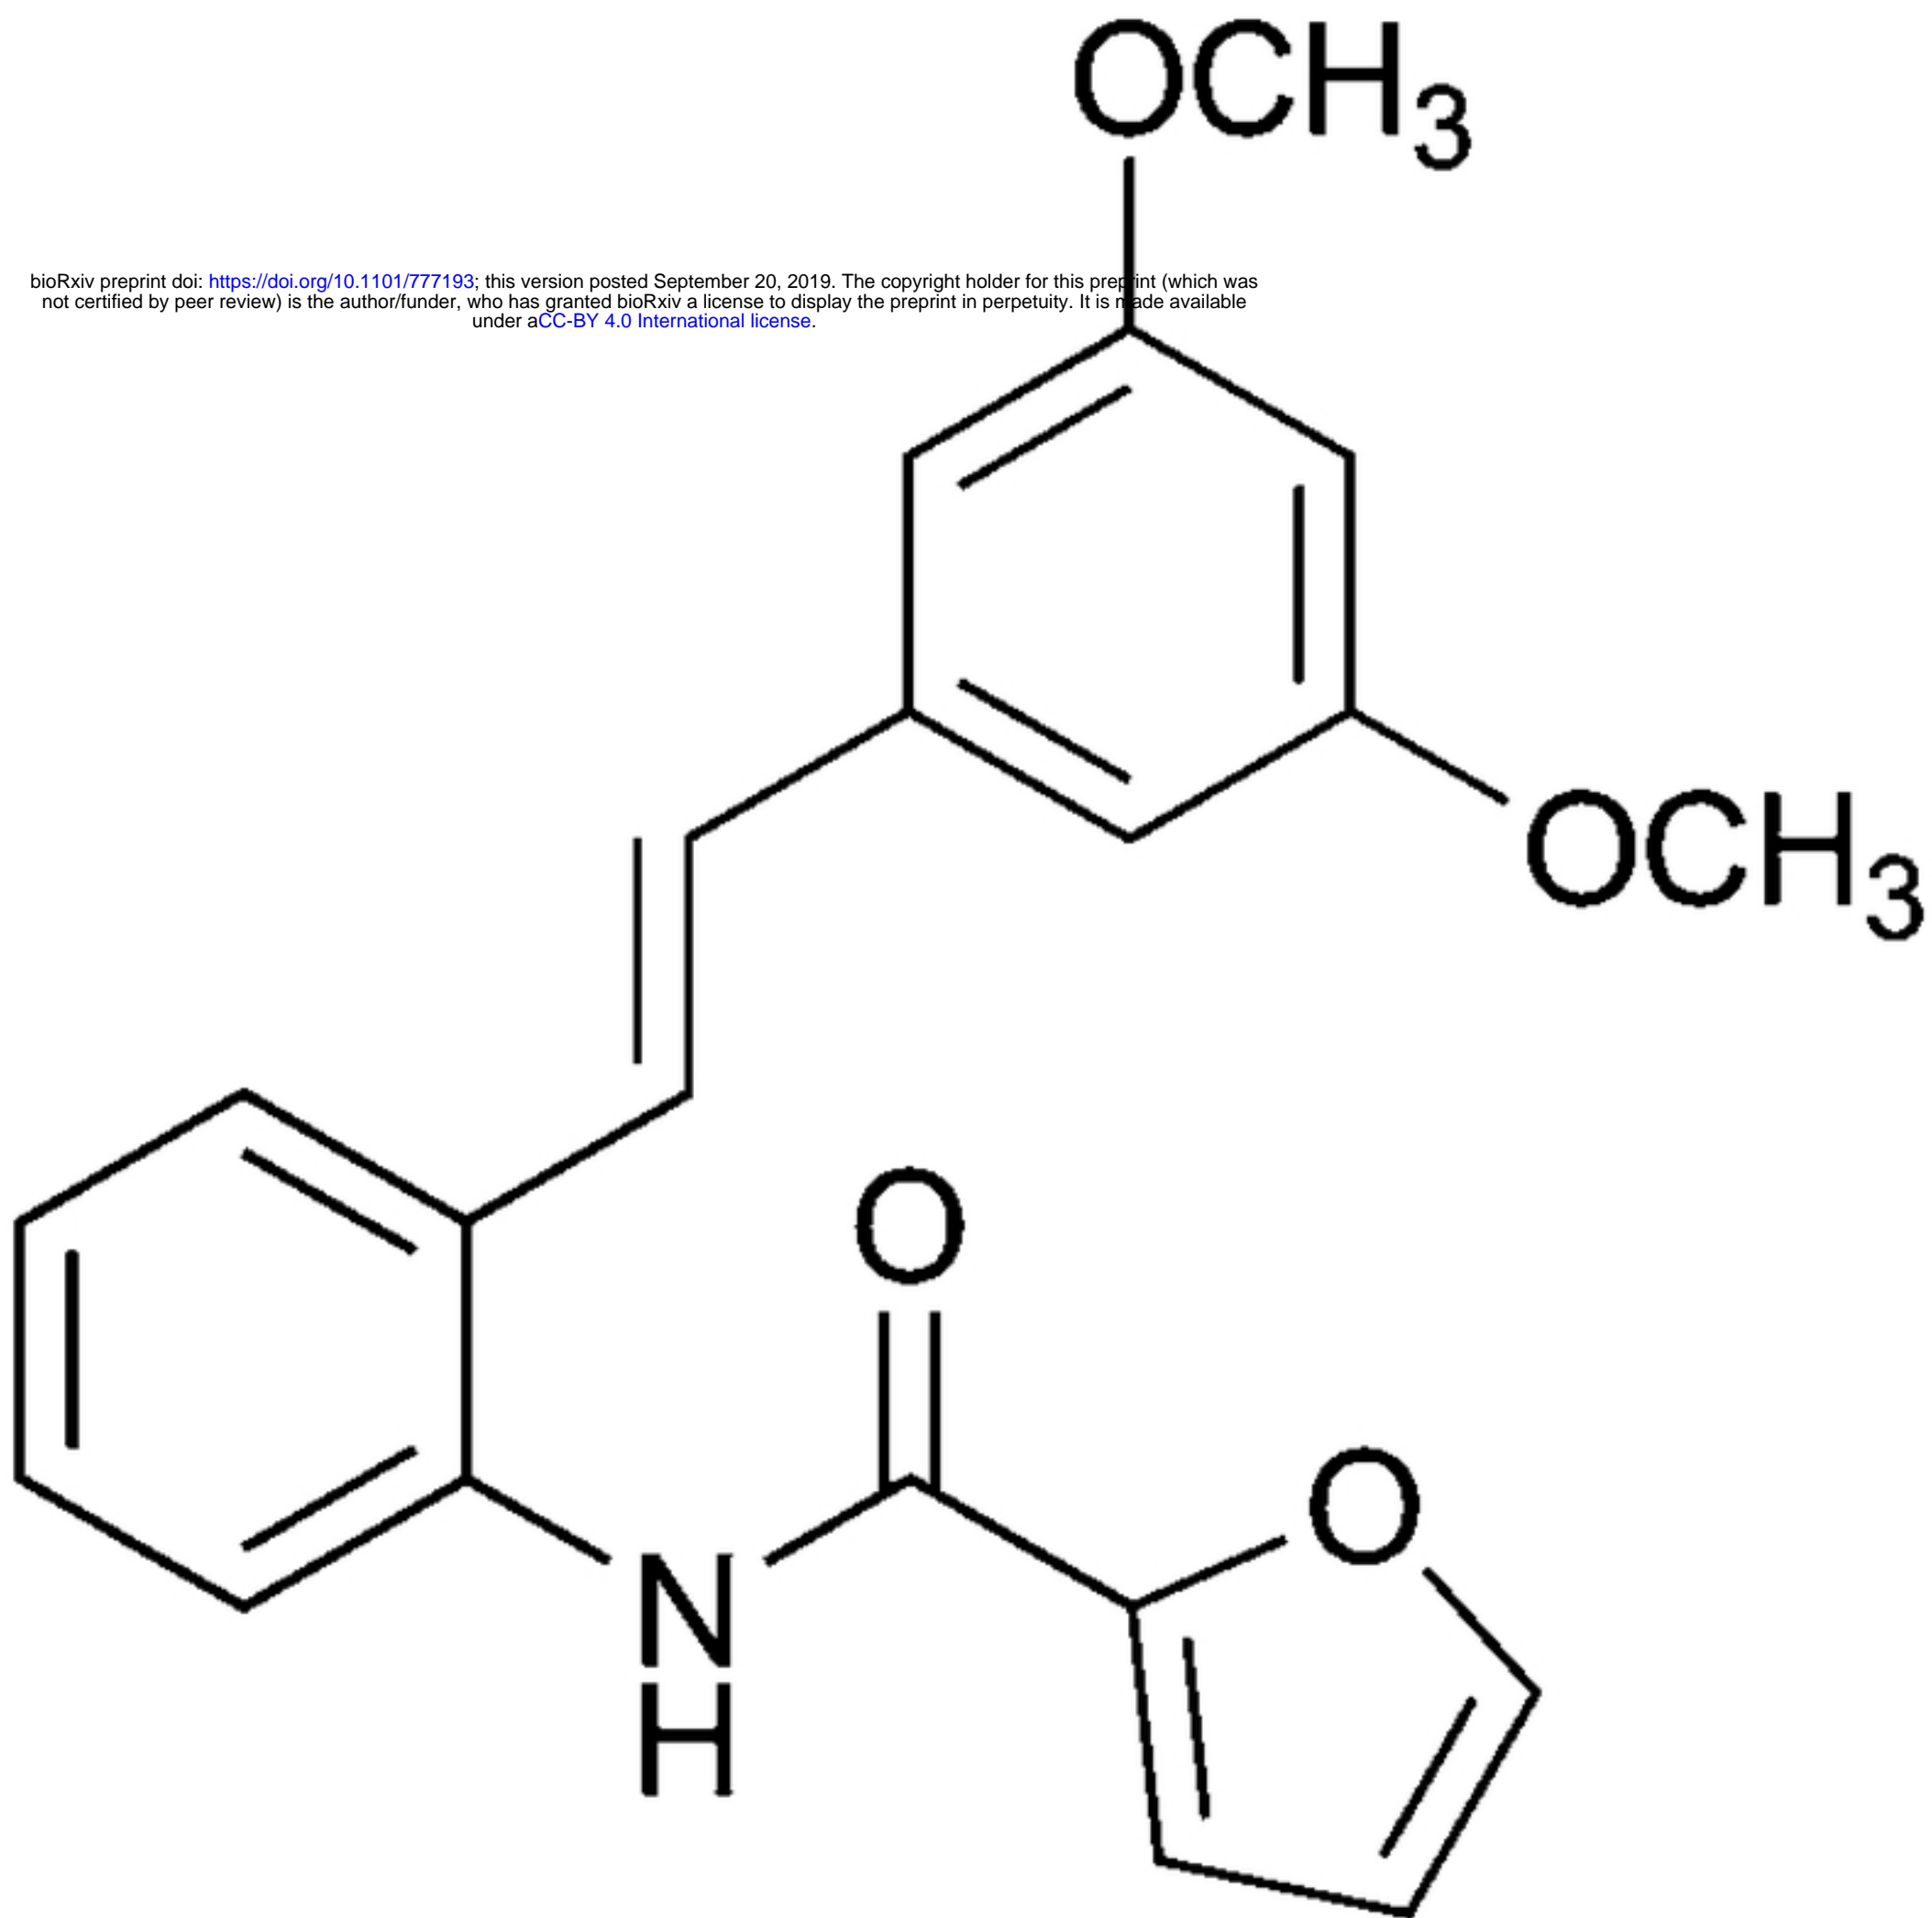

Figure 1

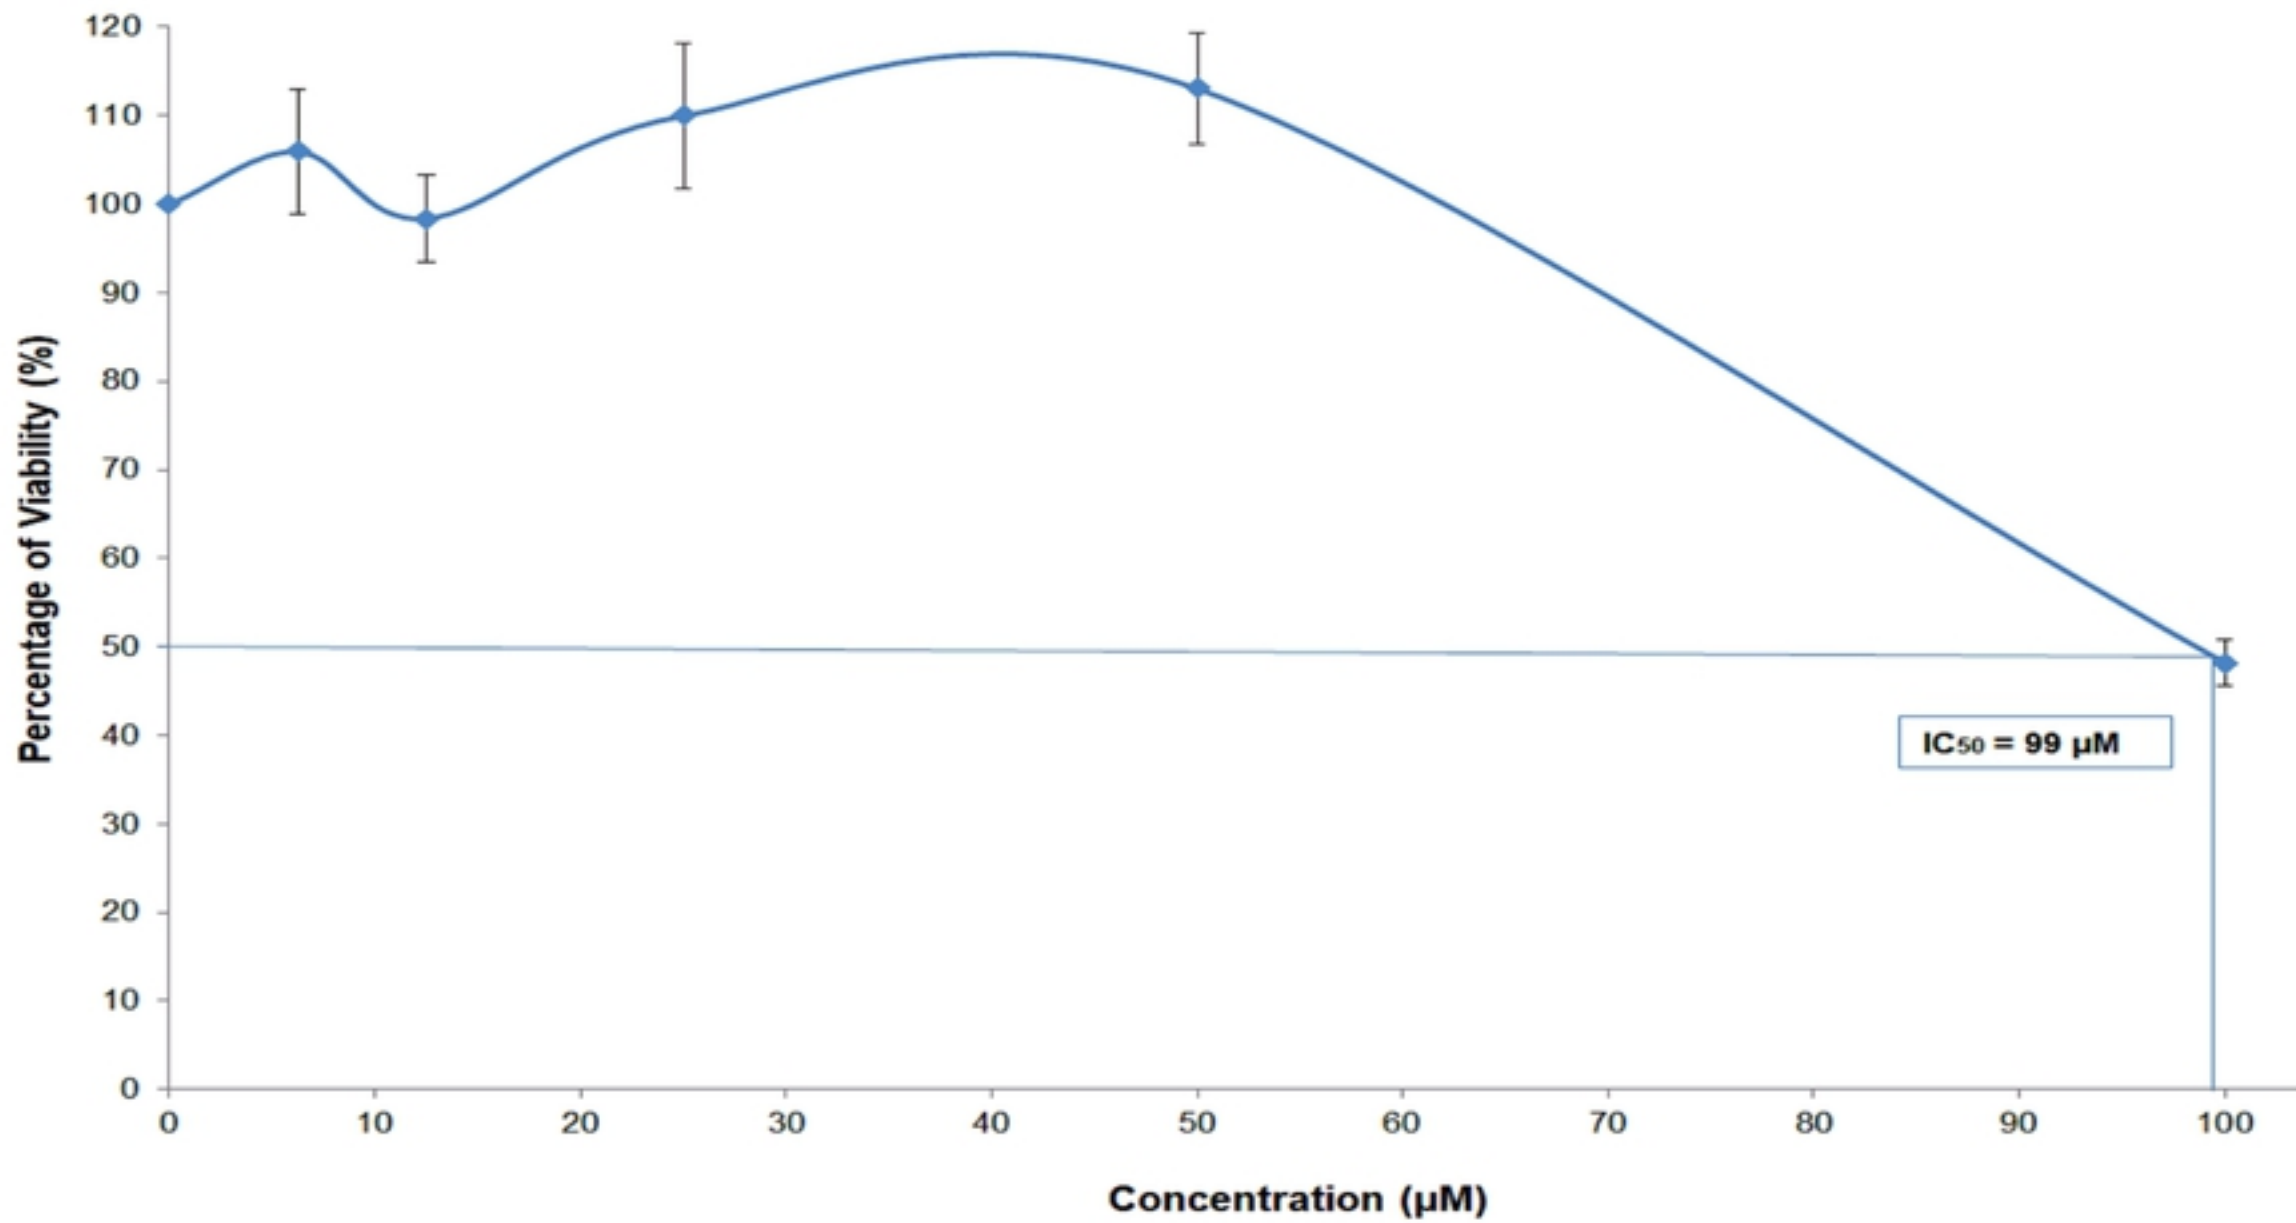

Figure 2A

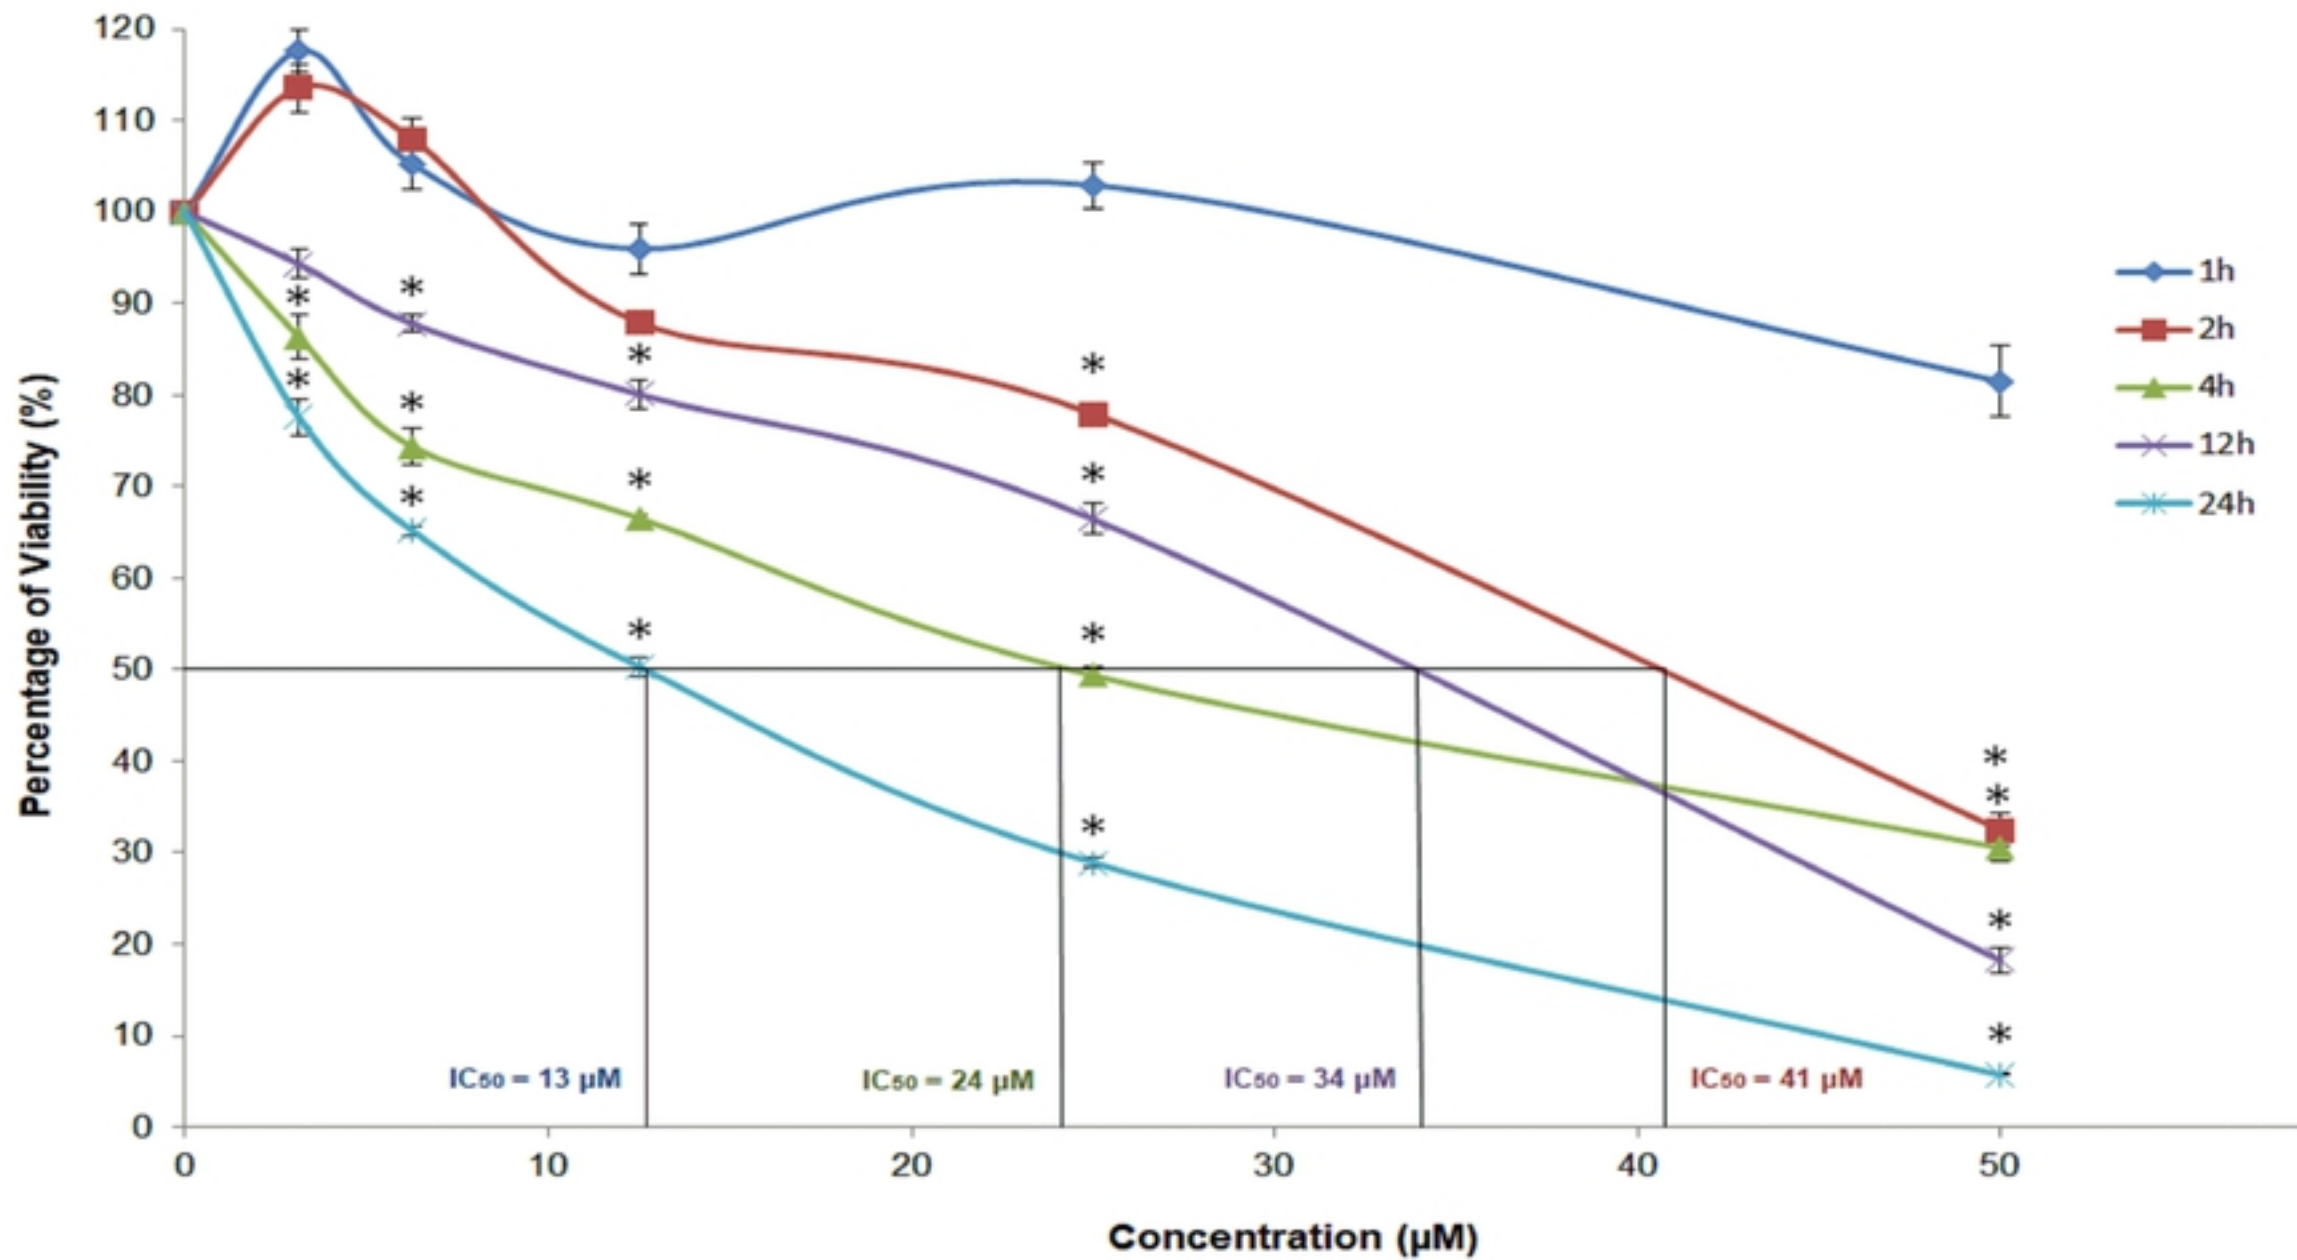

Figure 2B

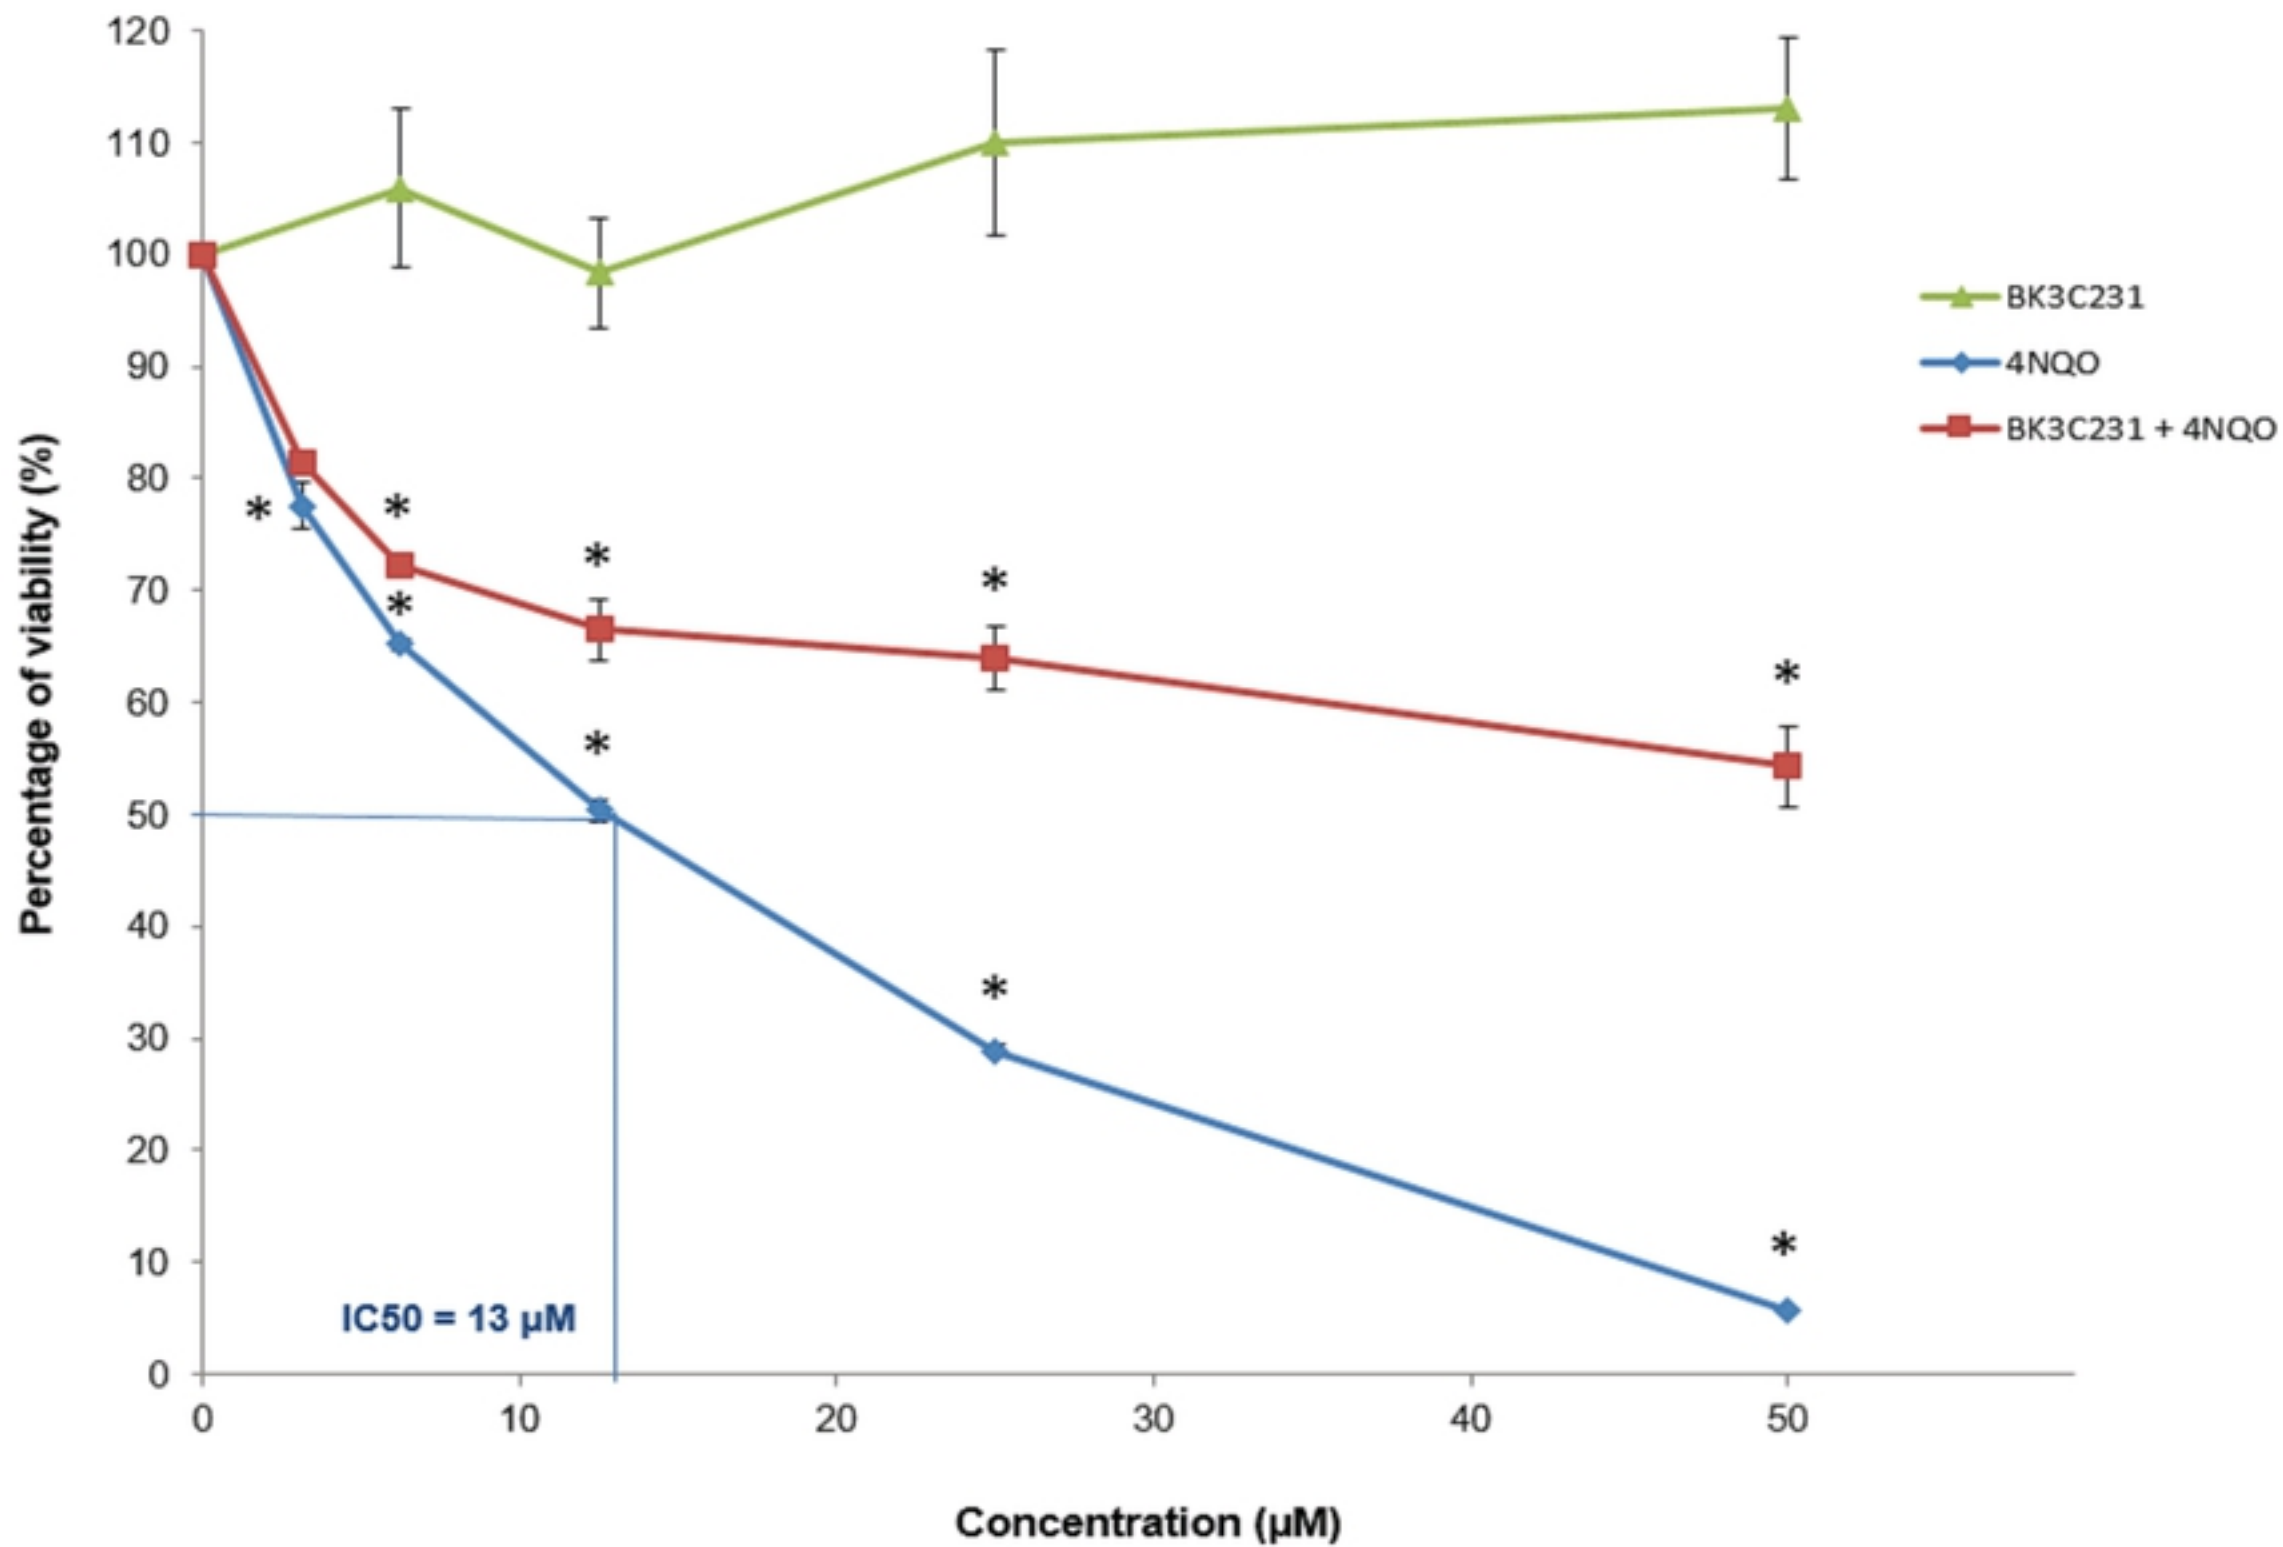

Figure 2C



A

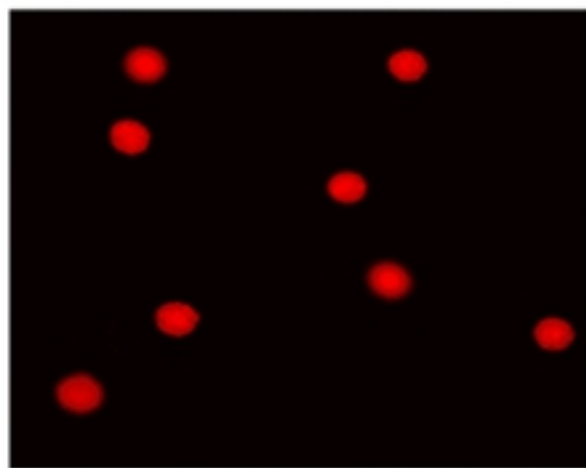

(i)

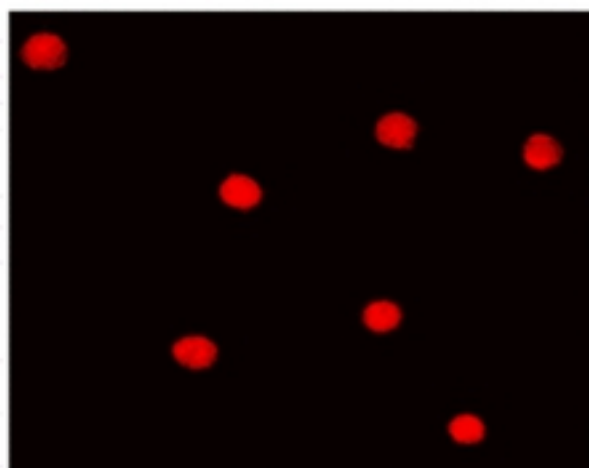

(ii)

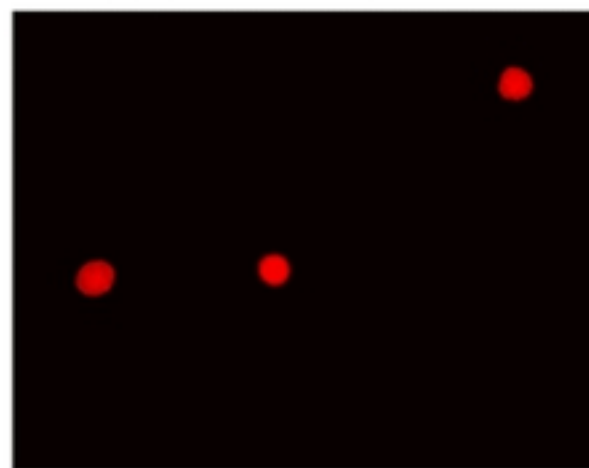

(iii)

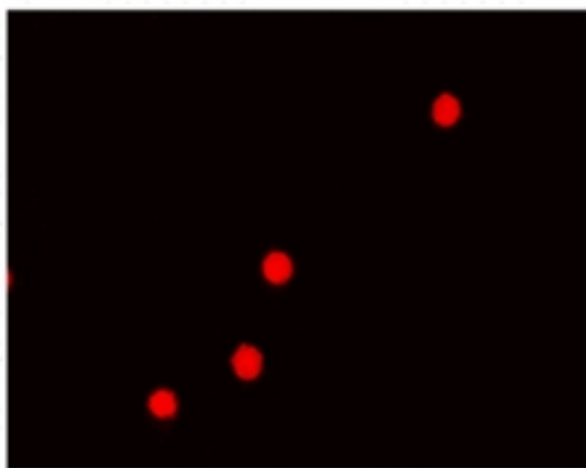

(iv)

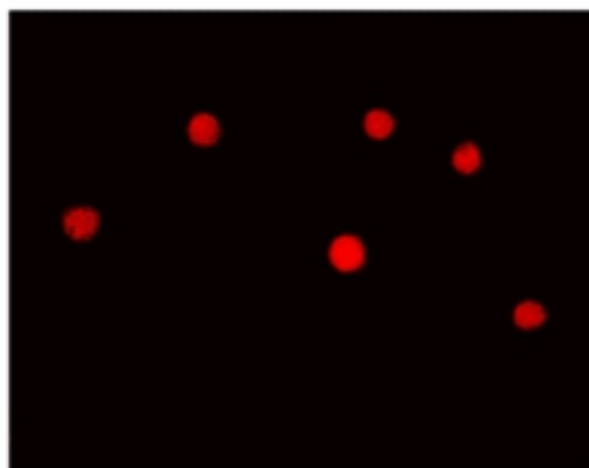

(v)

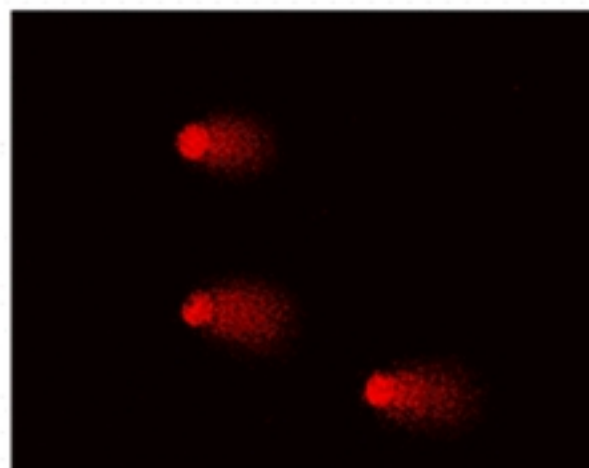

(vi)

Figure 3A

B

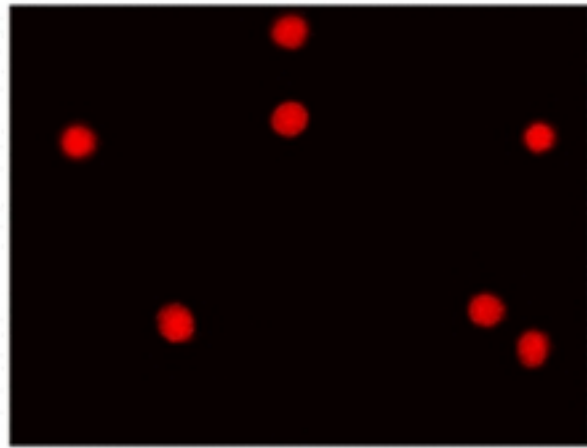

(i)

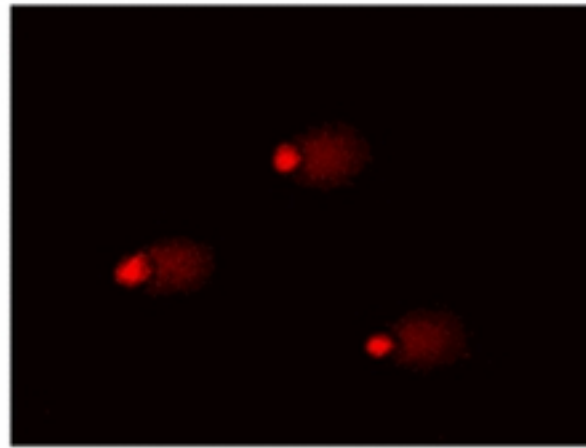

(ii)

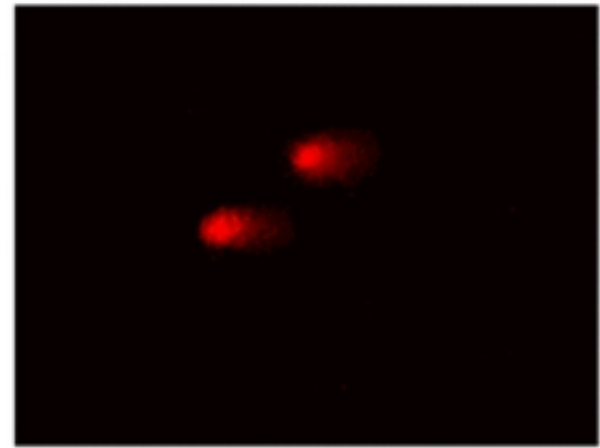

(iii)

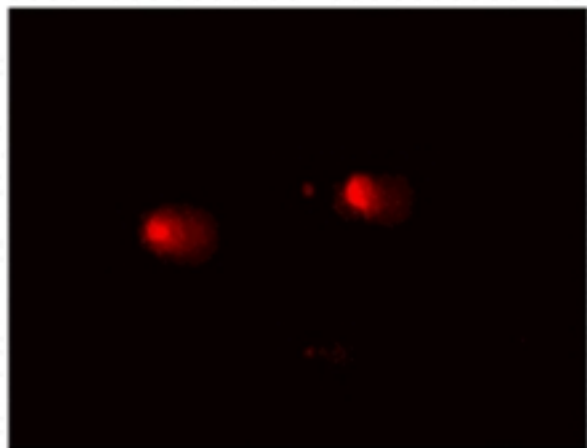

(iv)

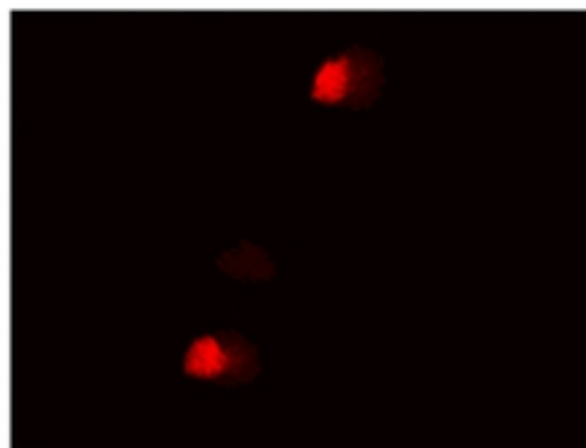

(v)

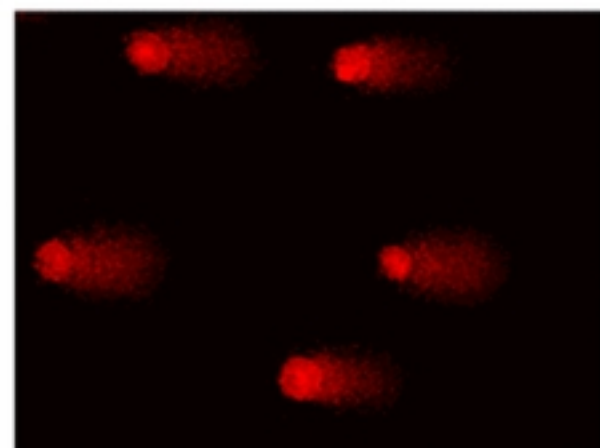

(vi)

Figure 3B

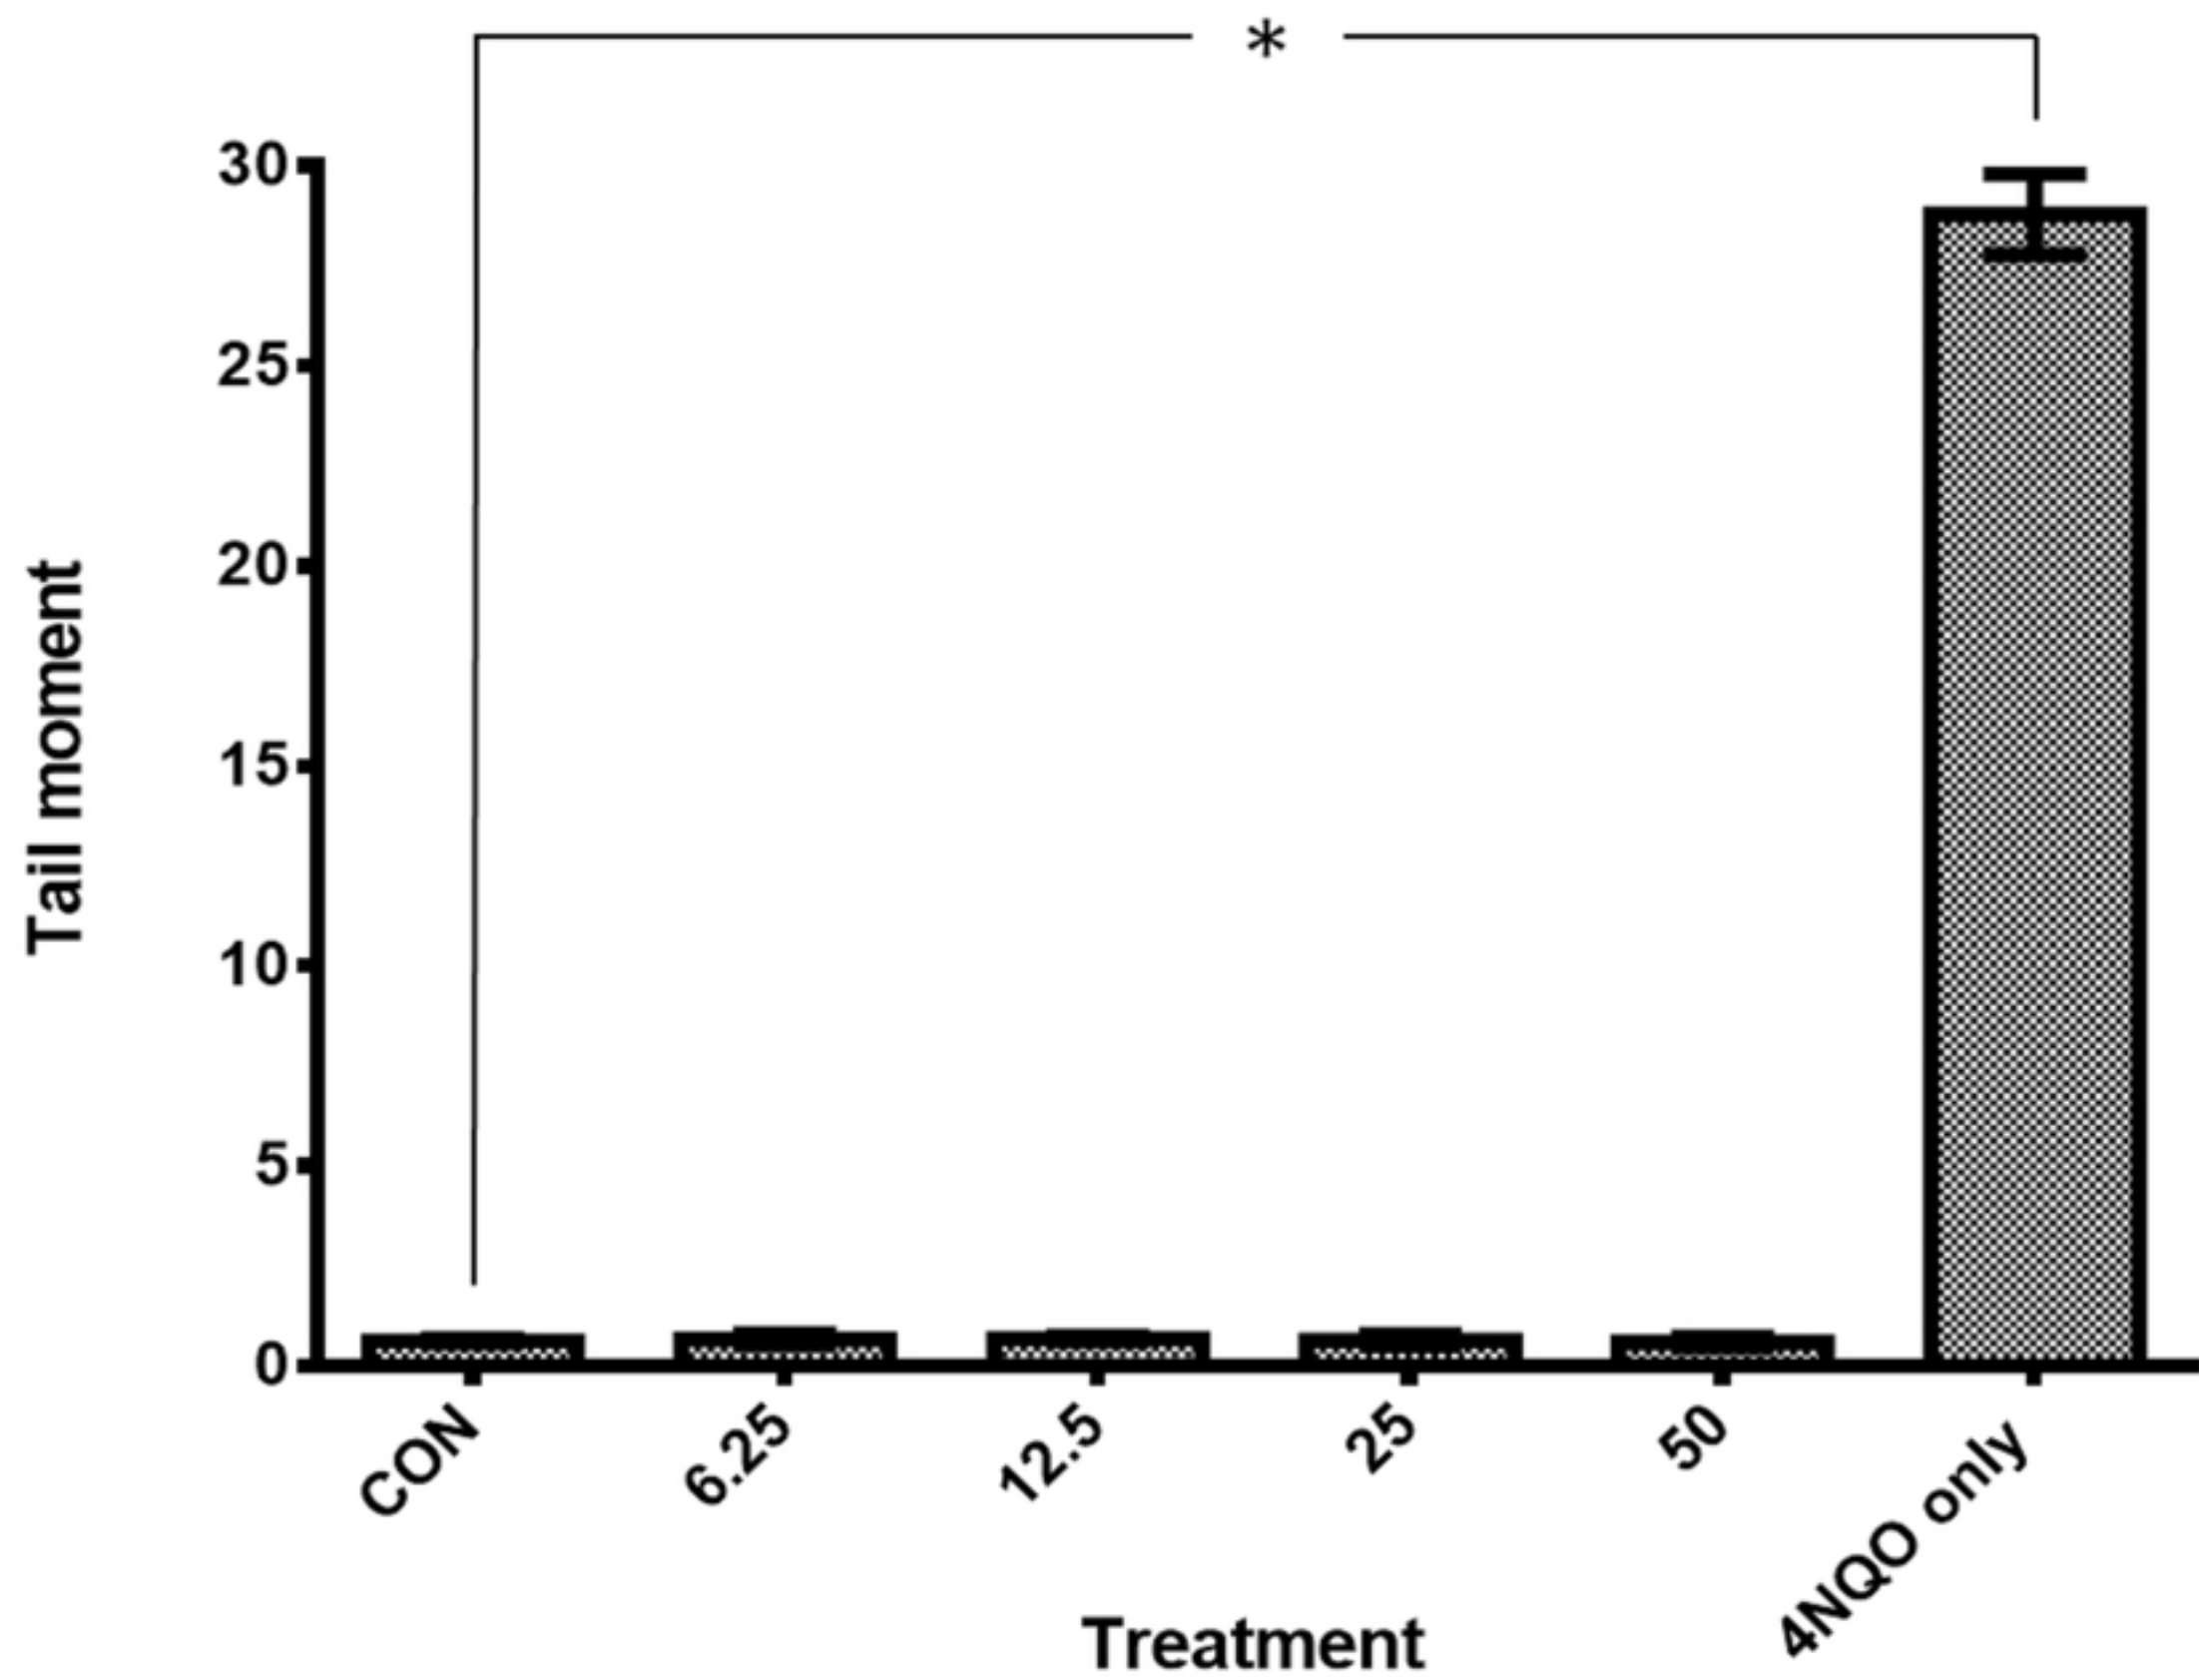

Figure 4A

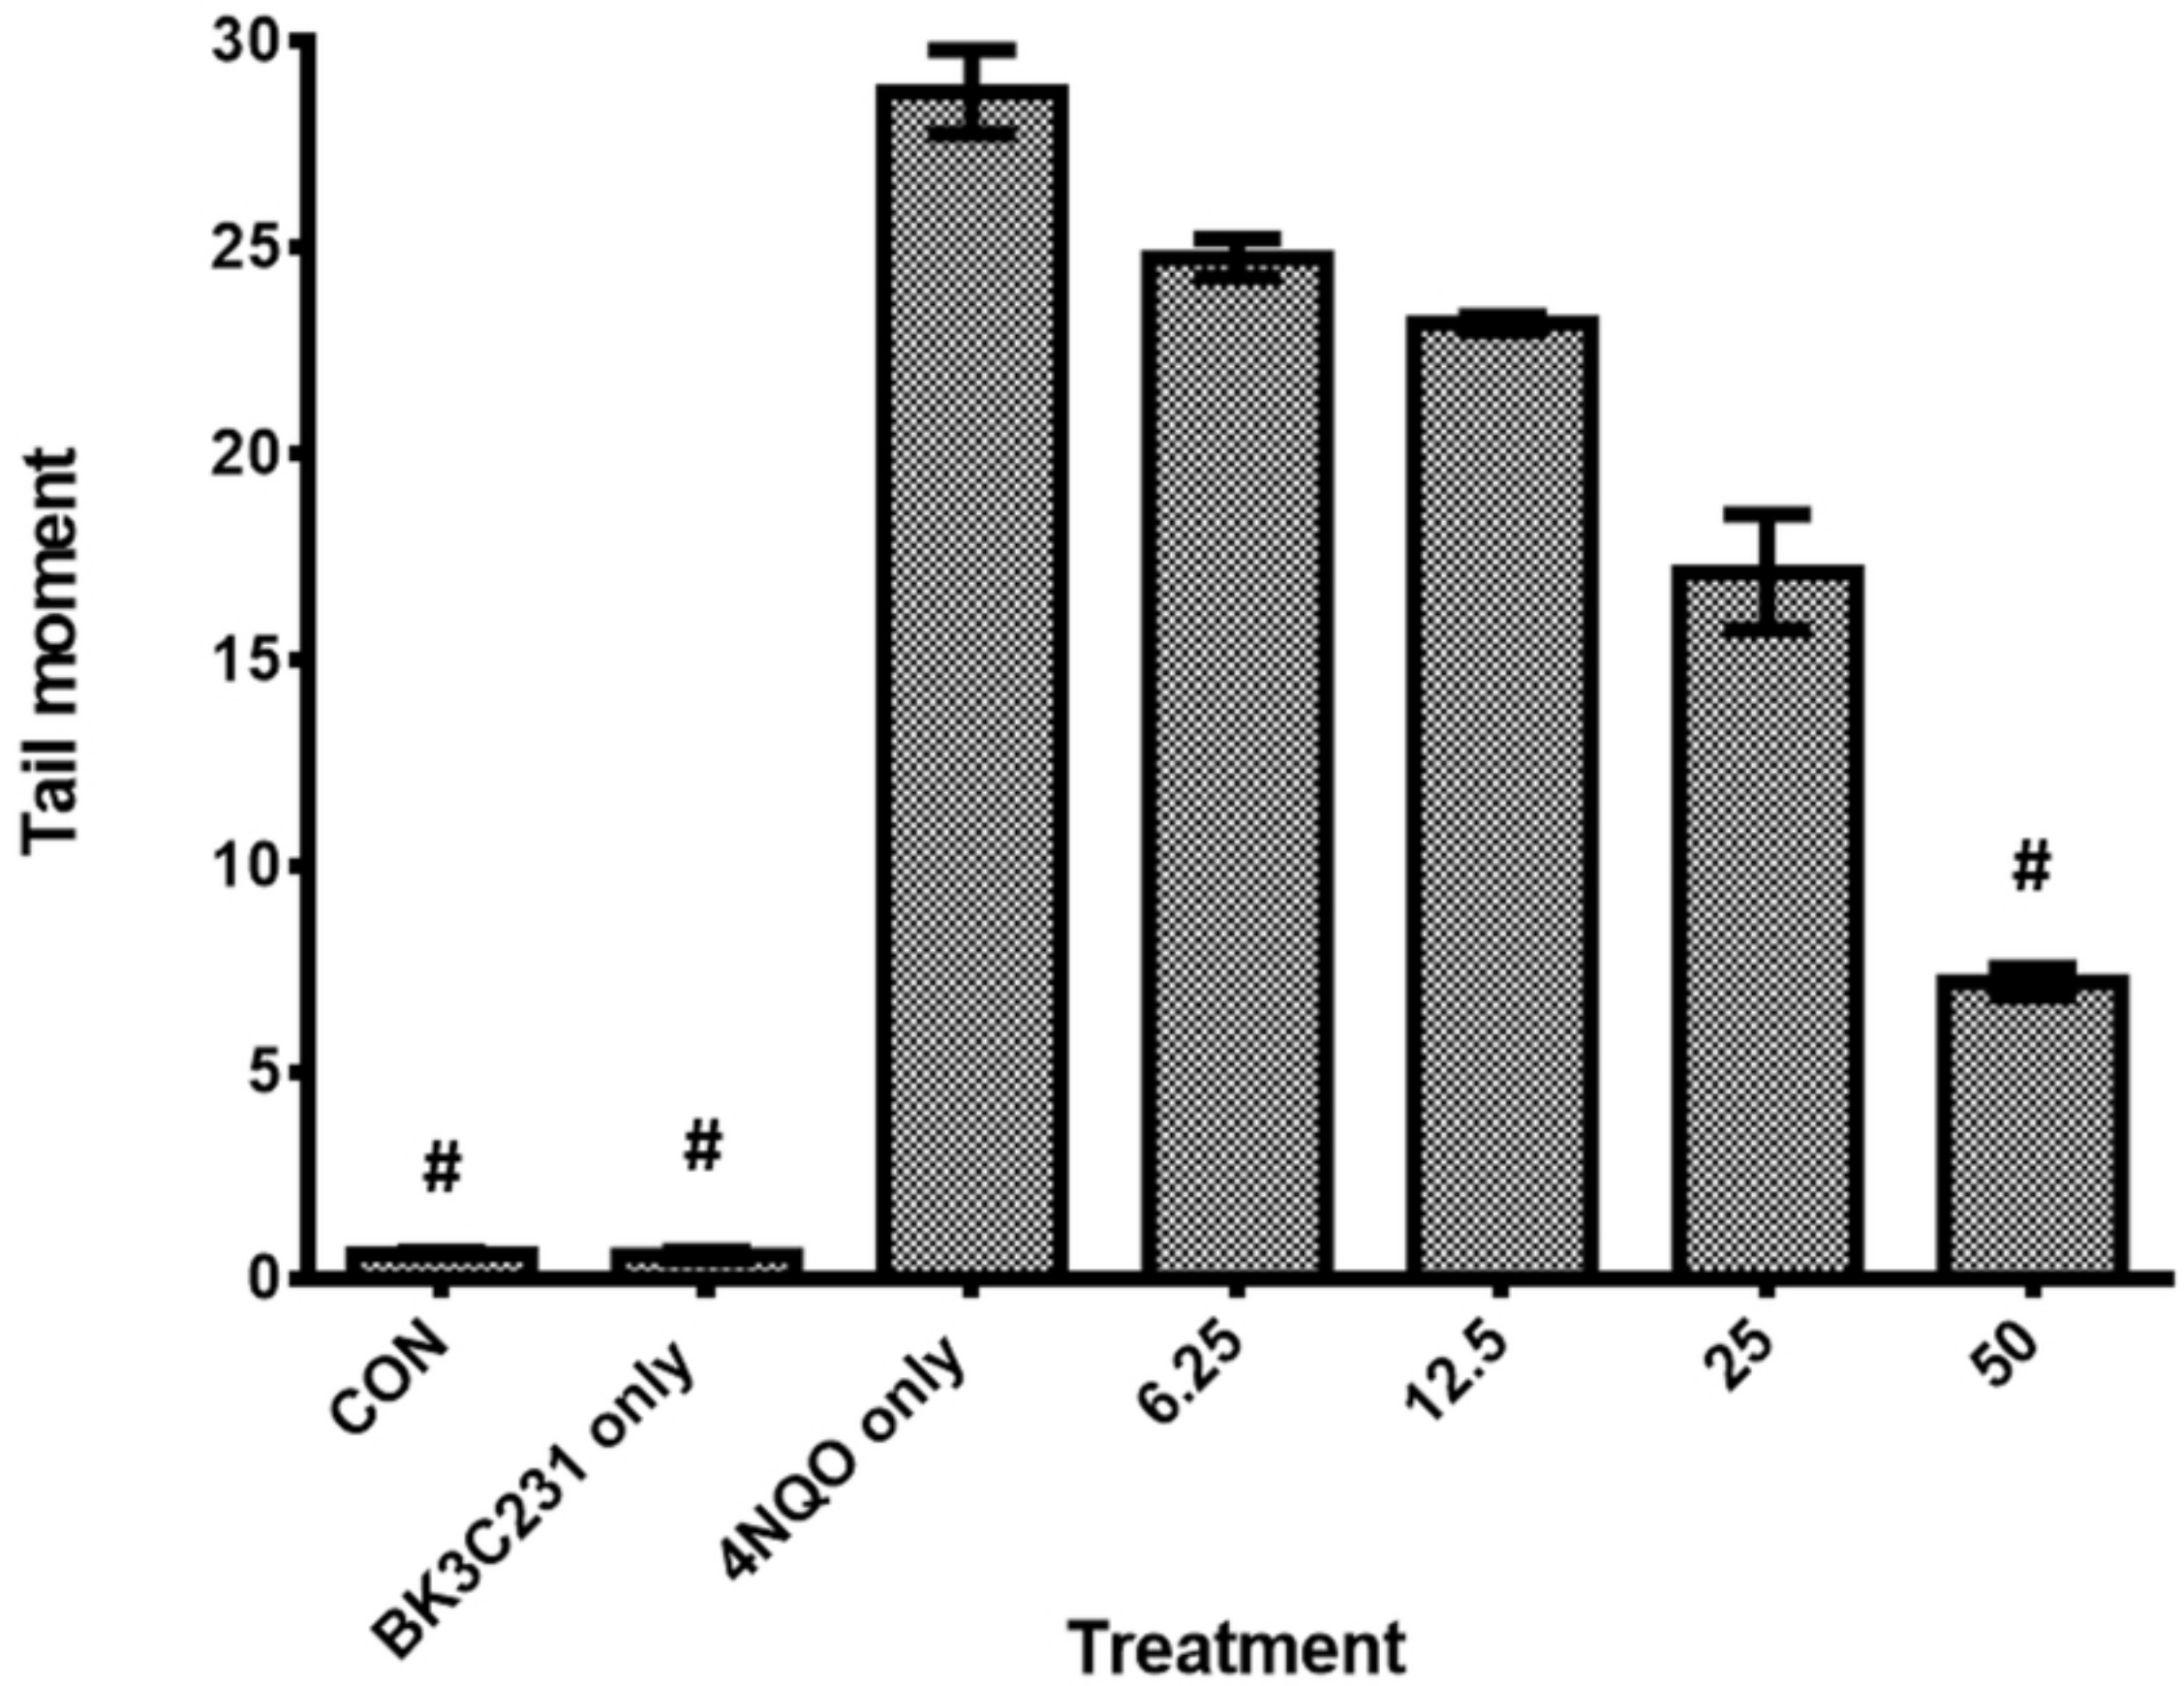

Figure 4B

A

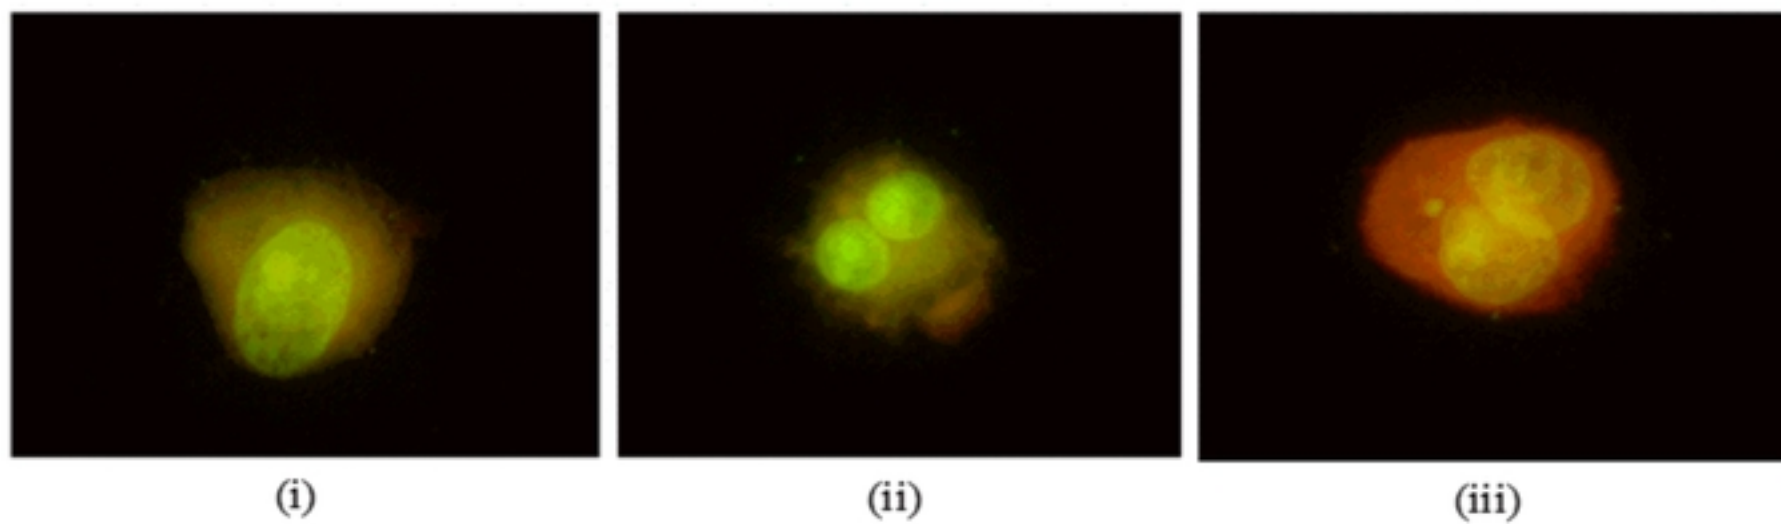

Figure 5A

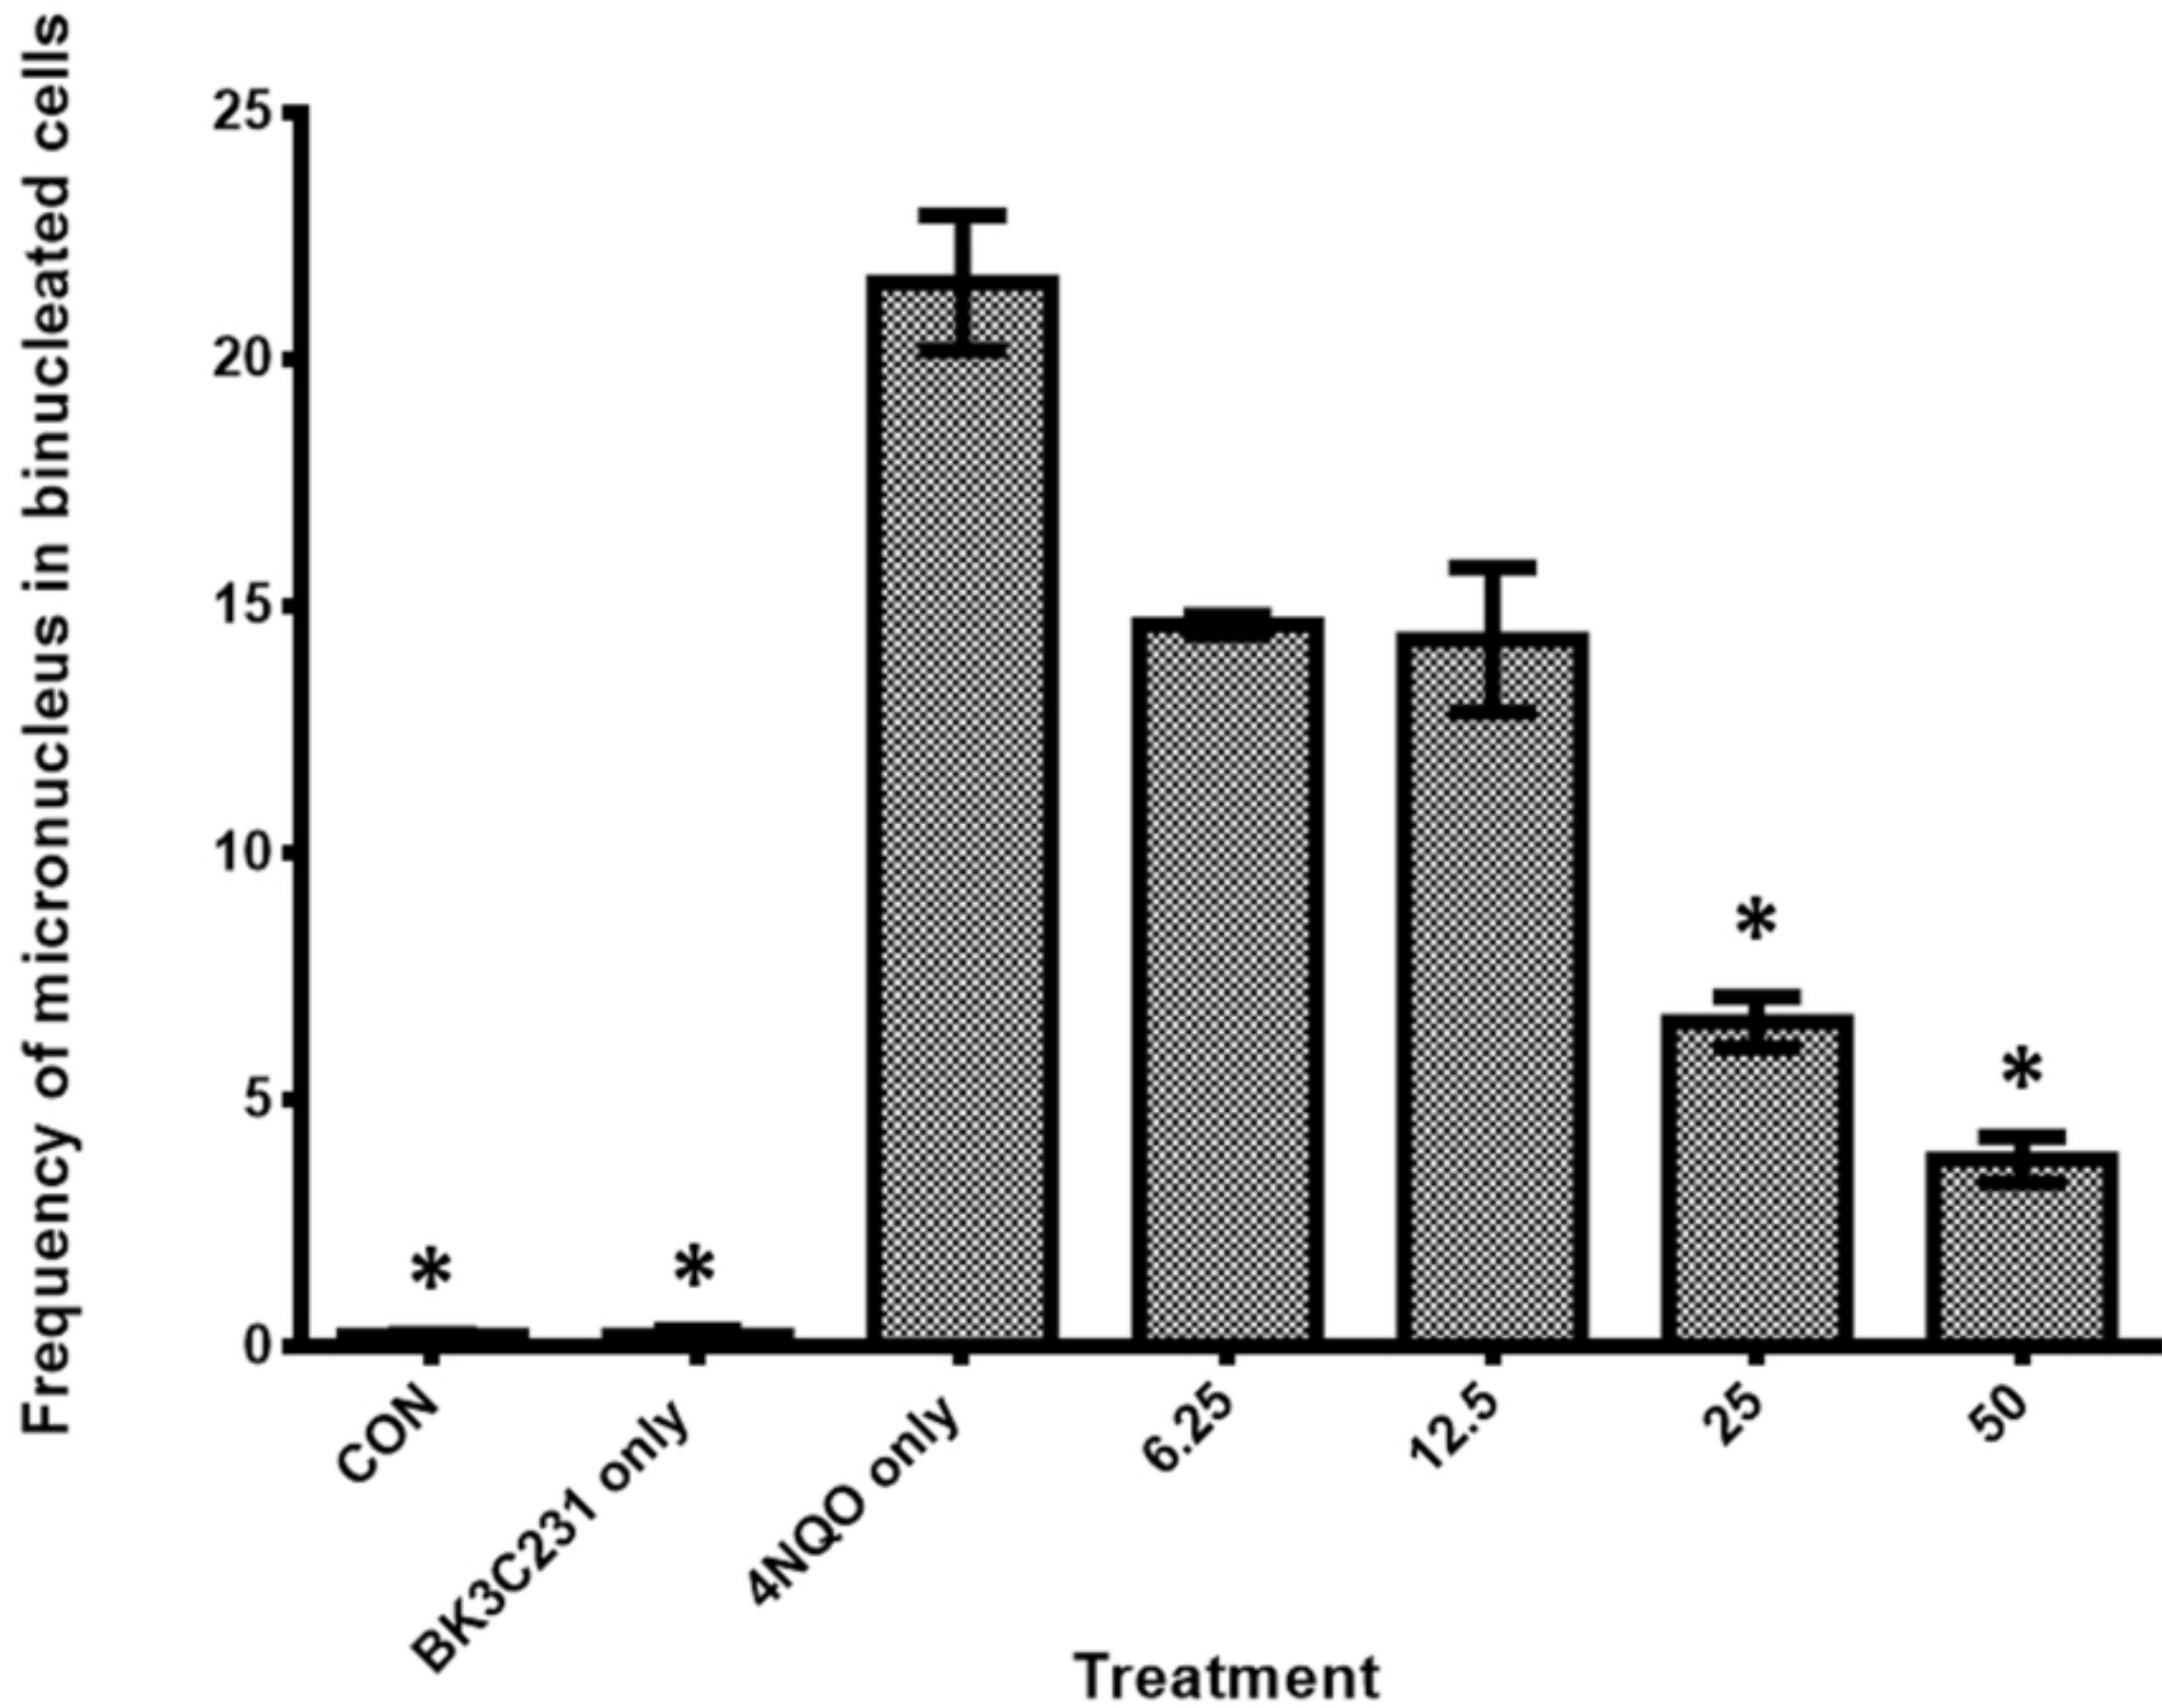

Figure 5B



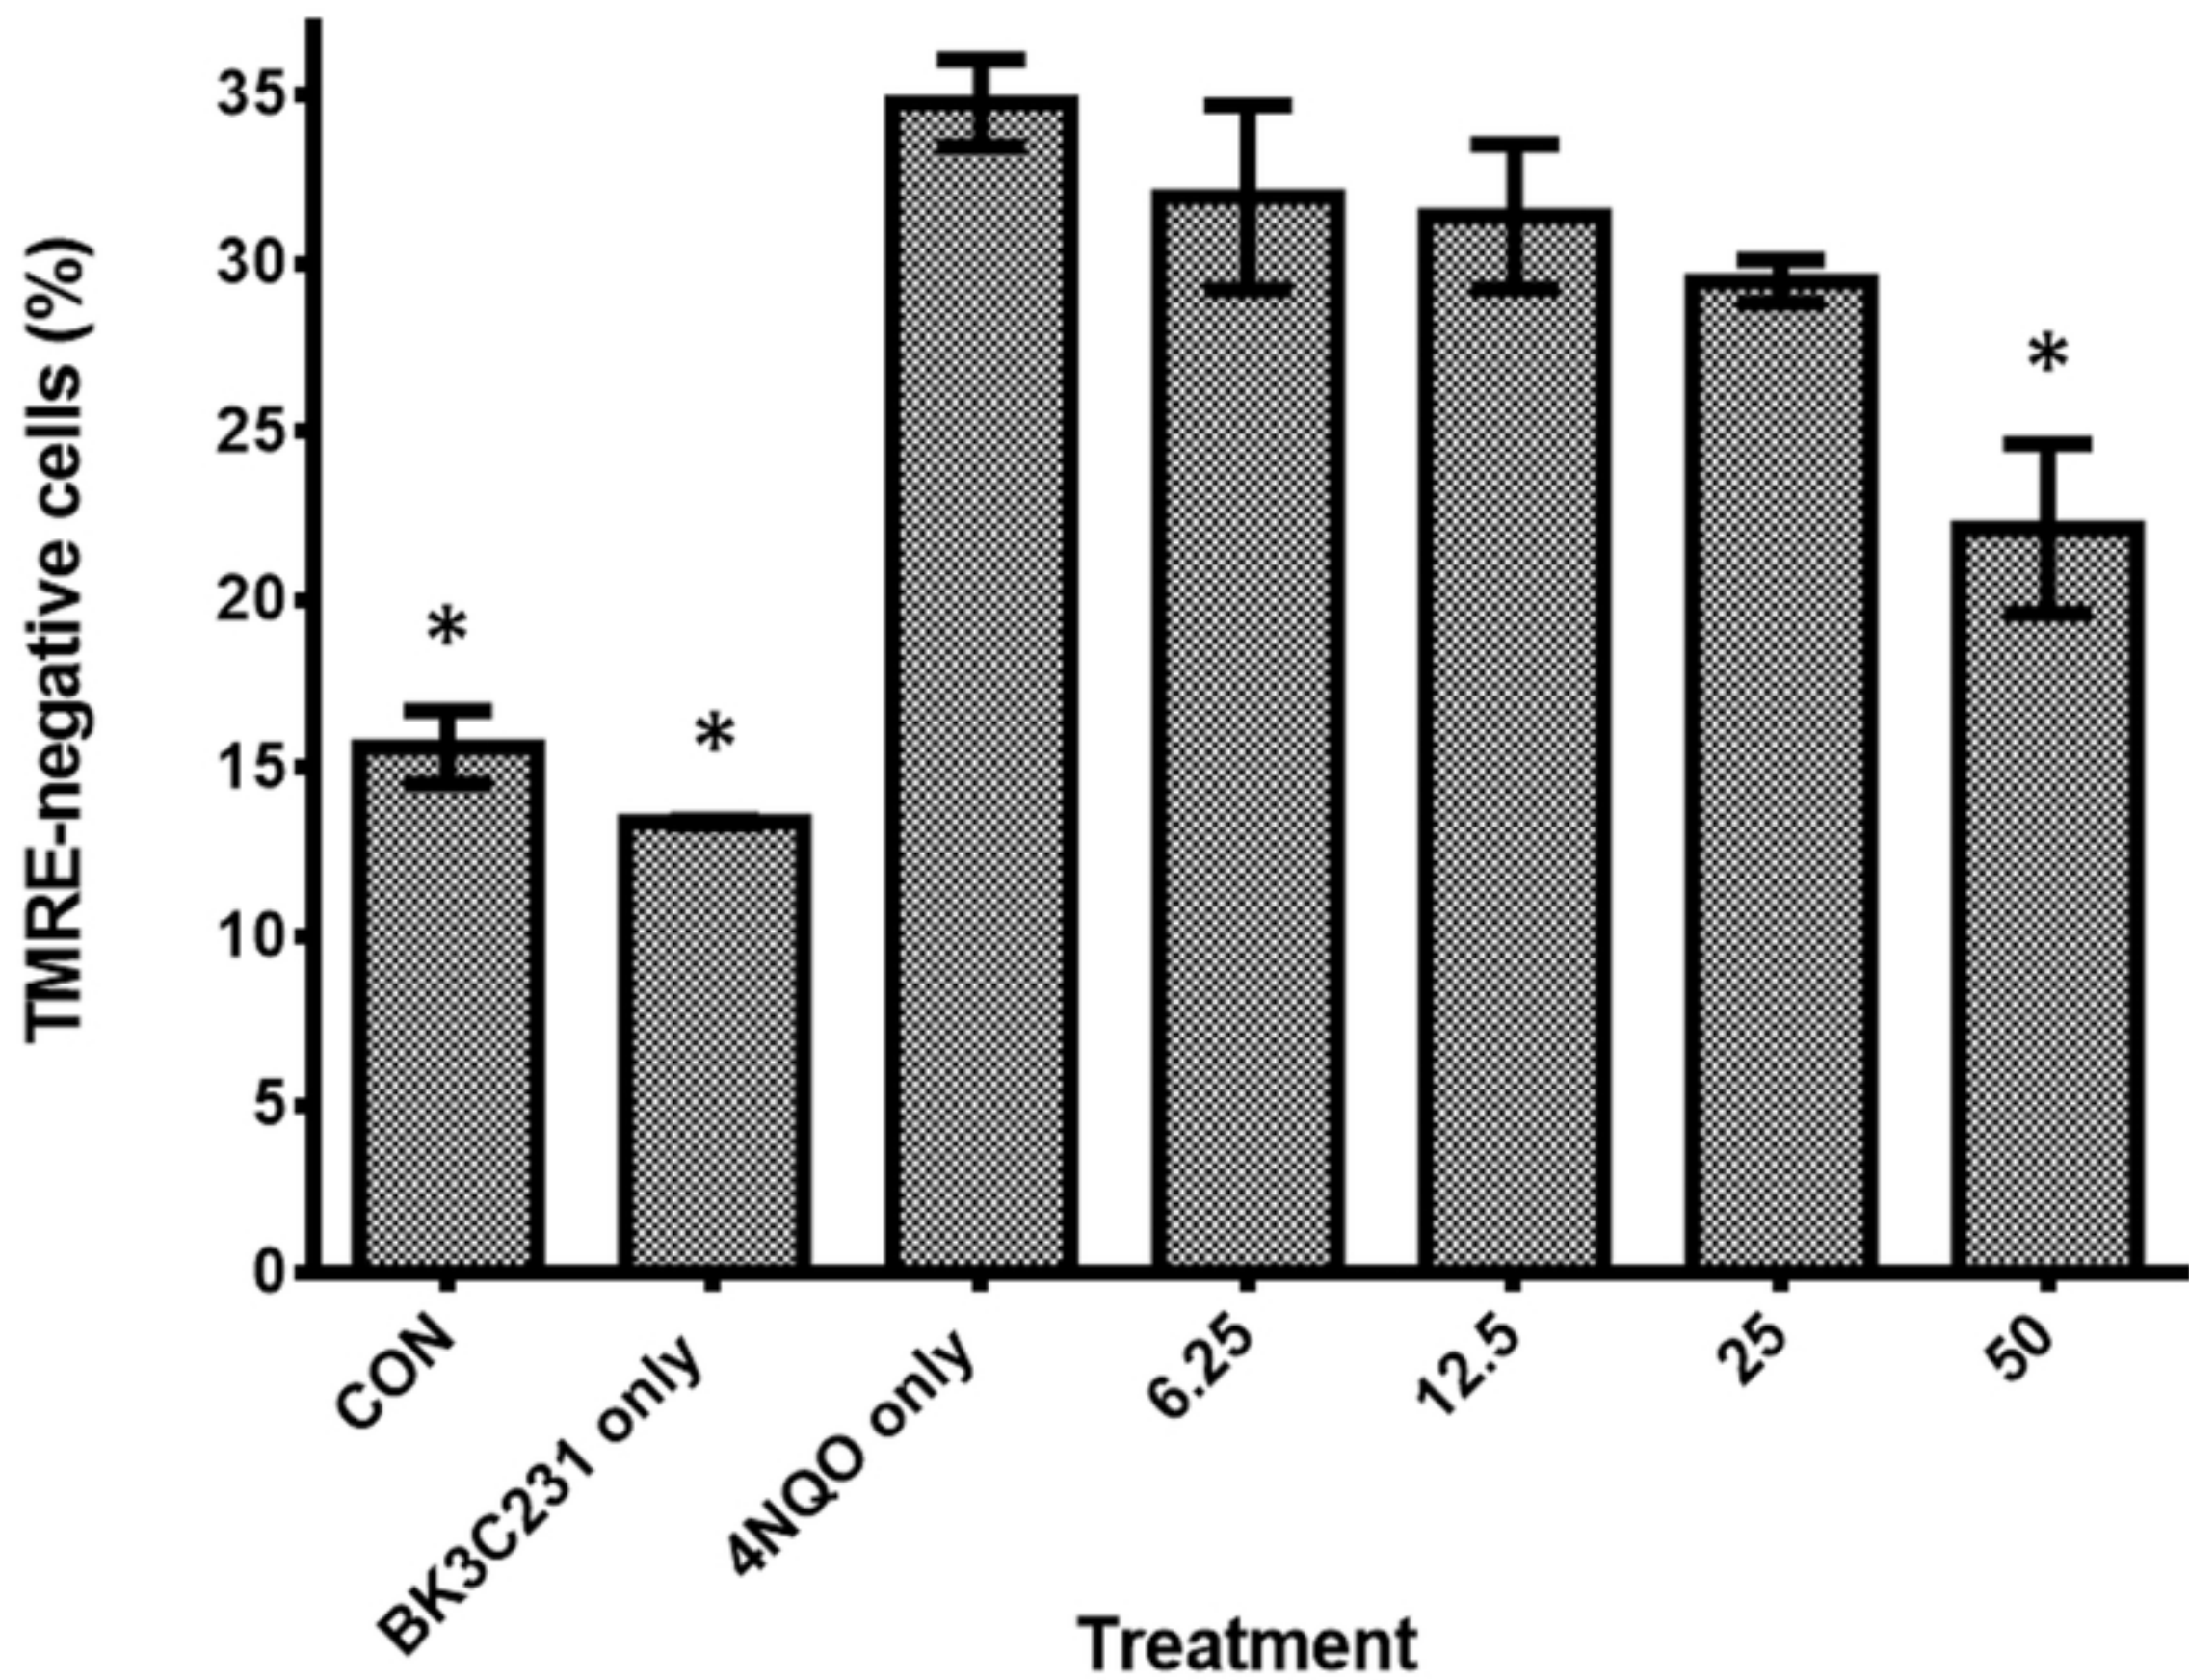

Figure 6

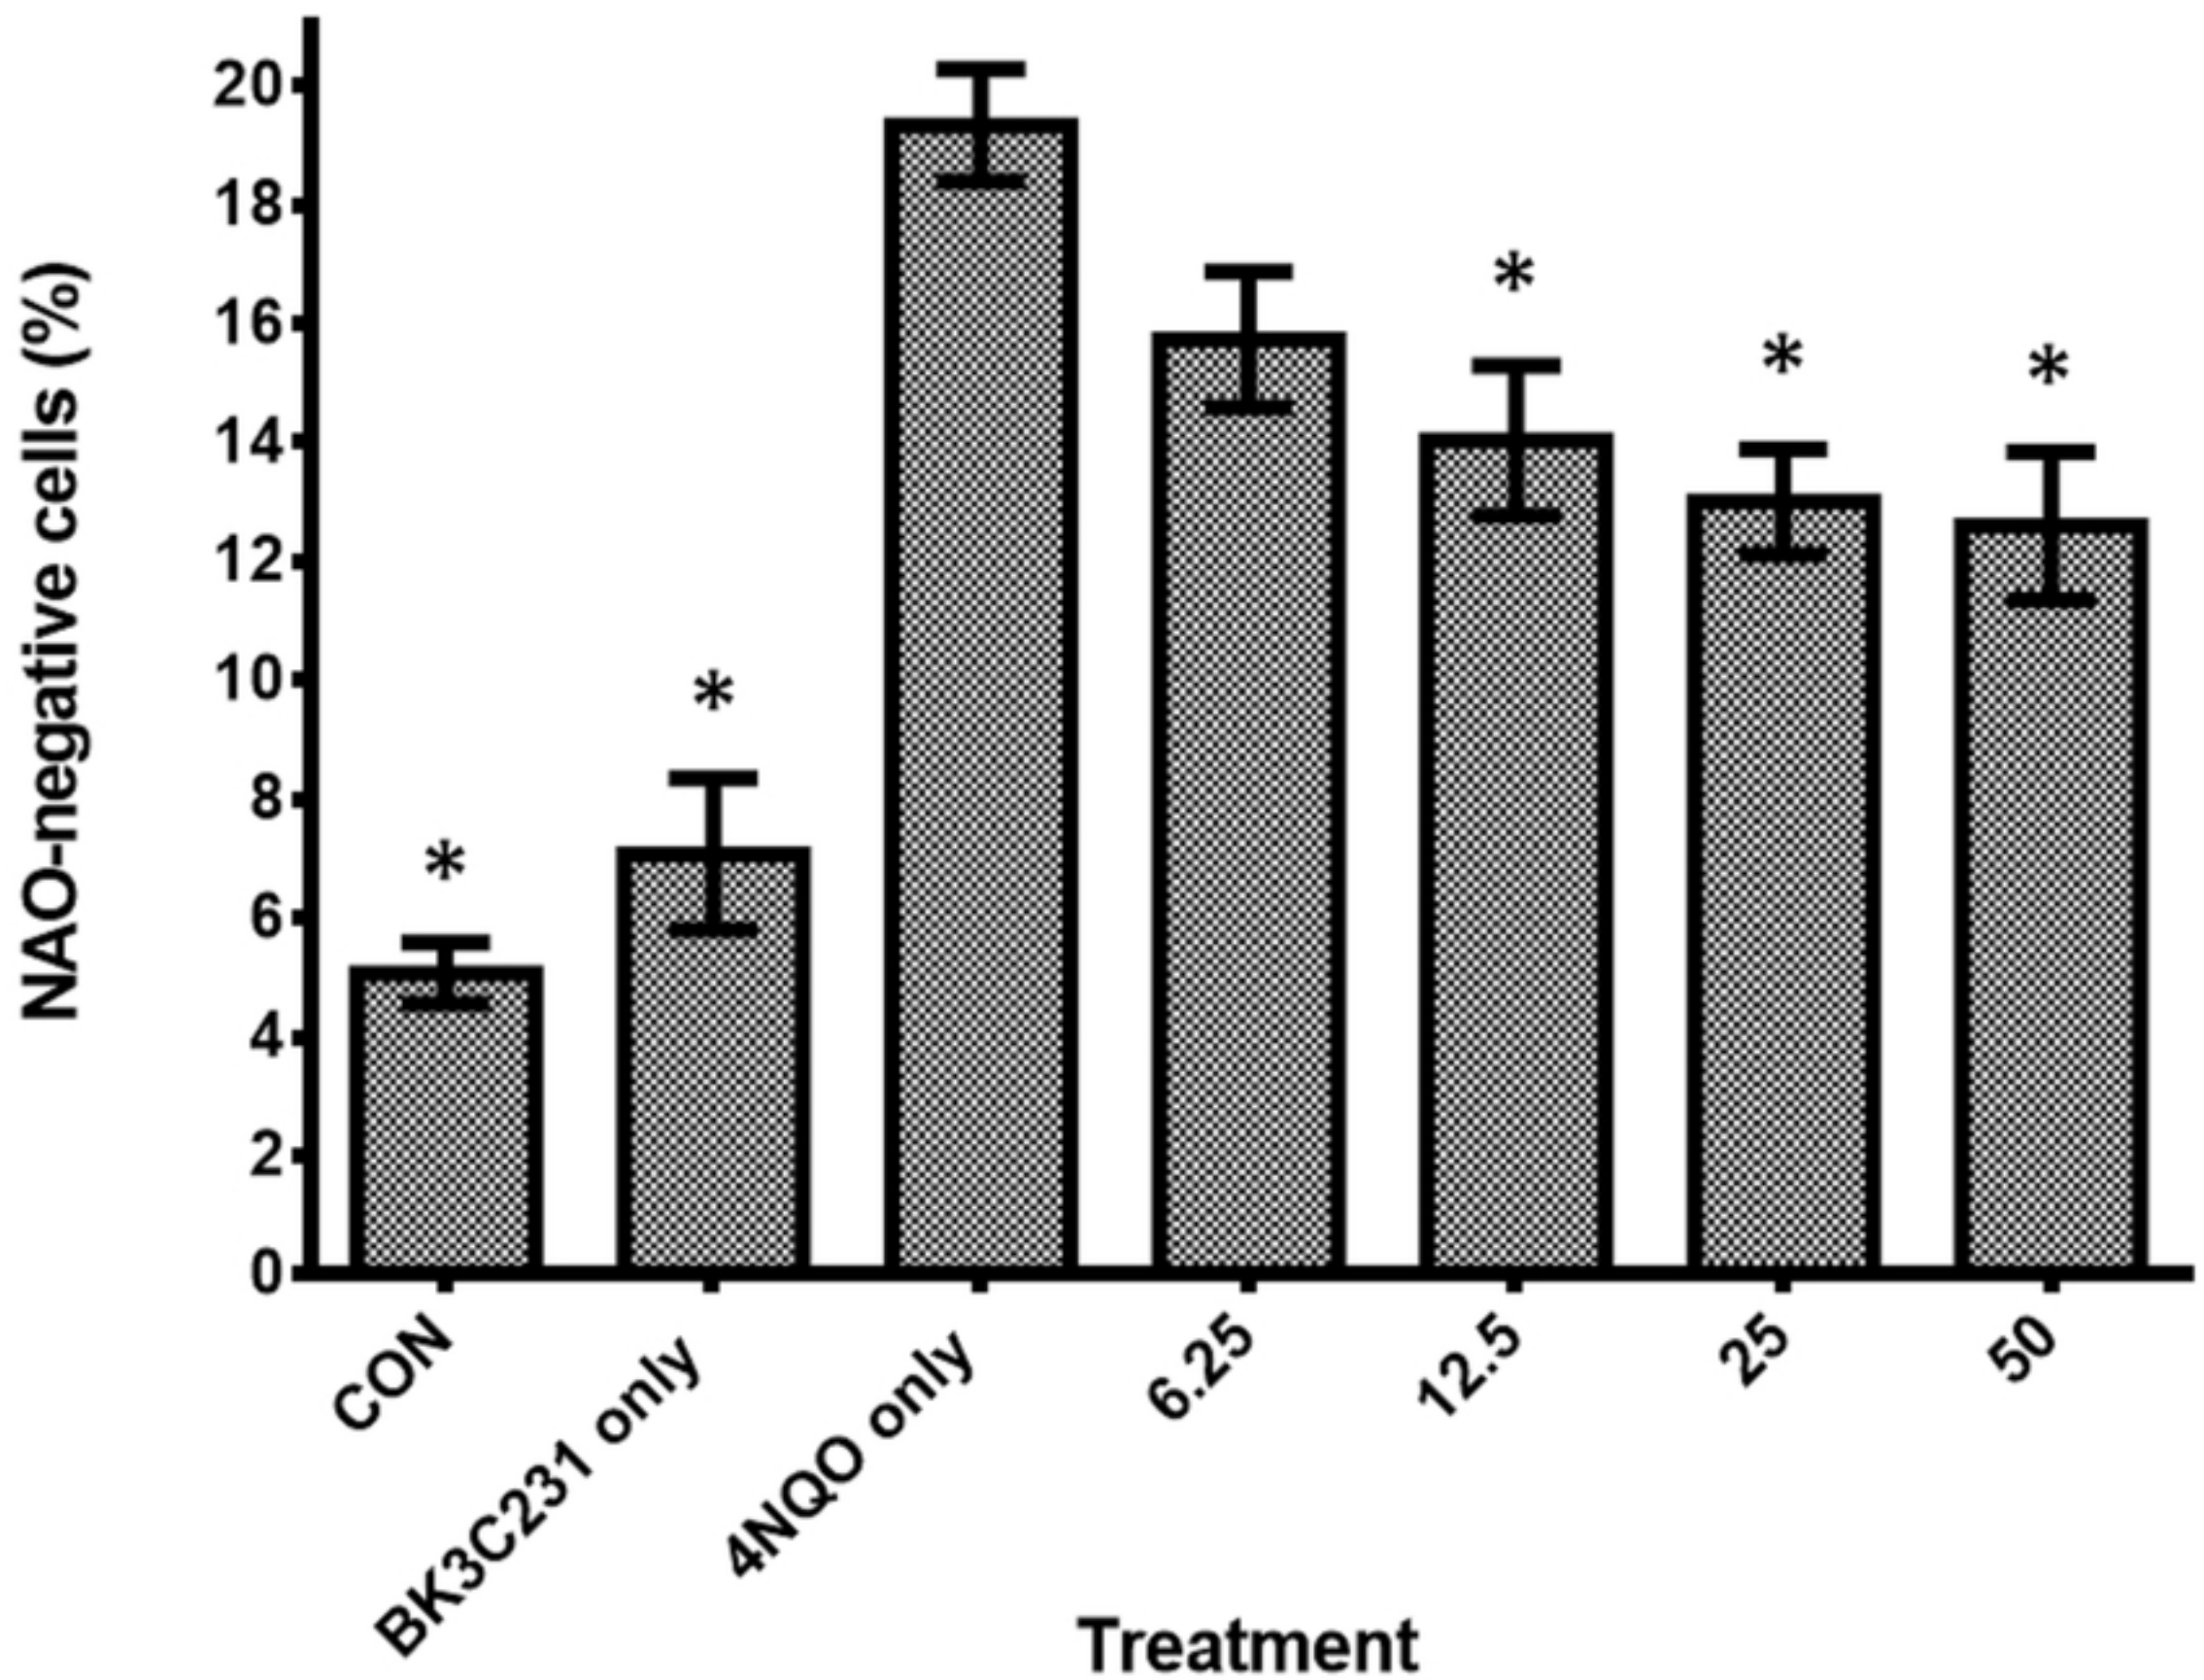

Figure 7



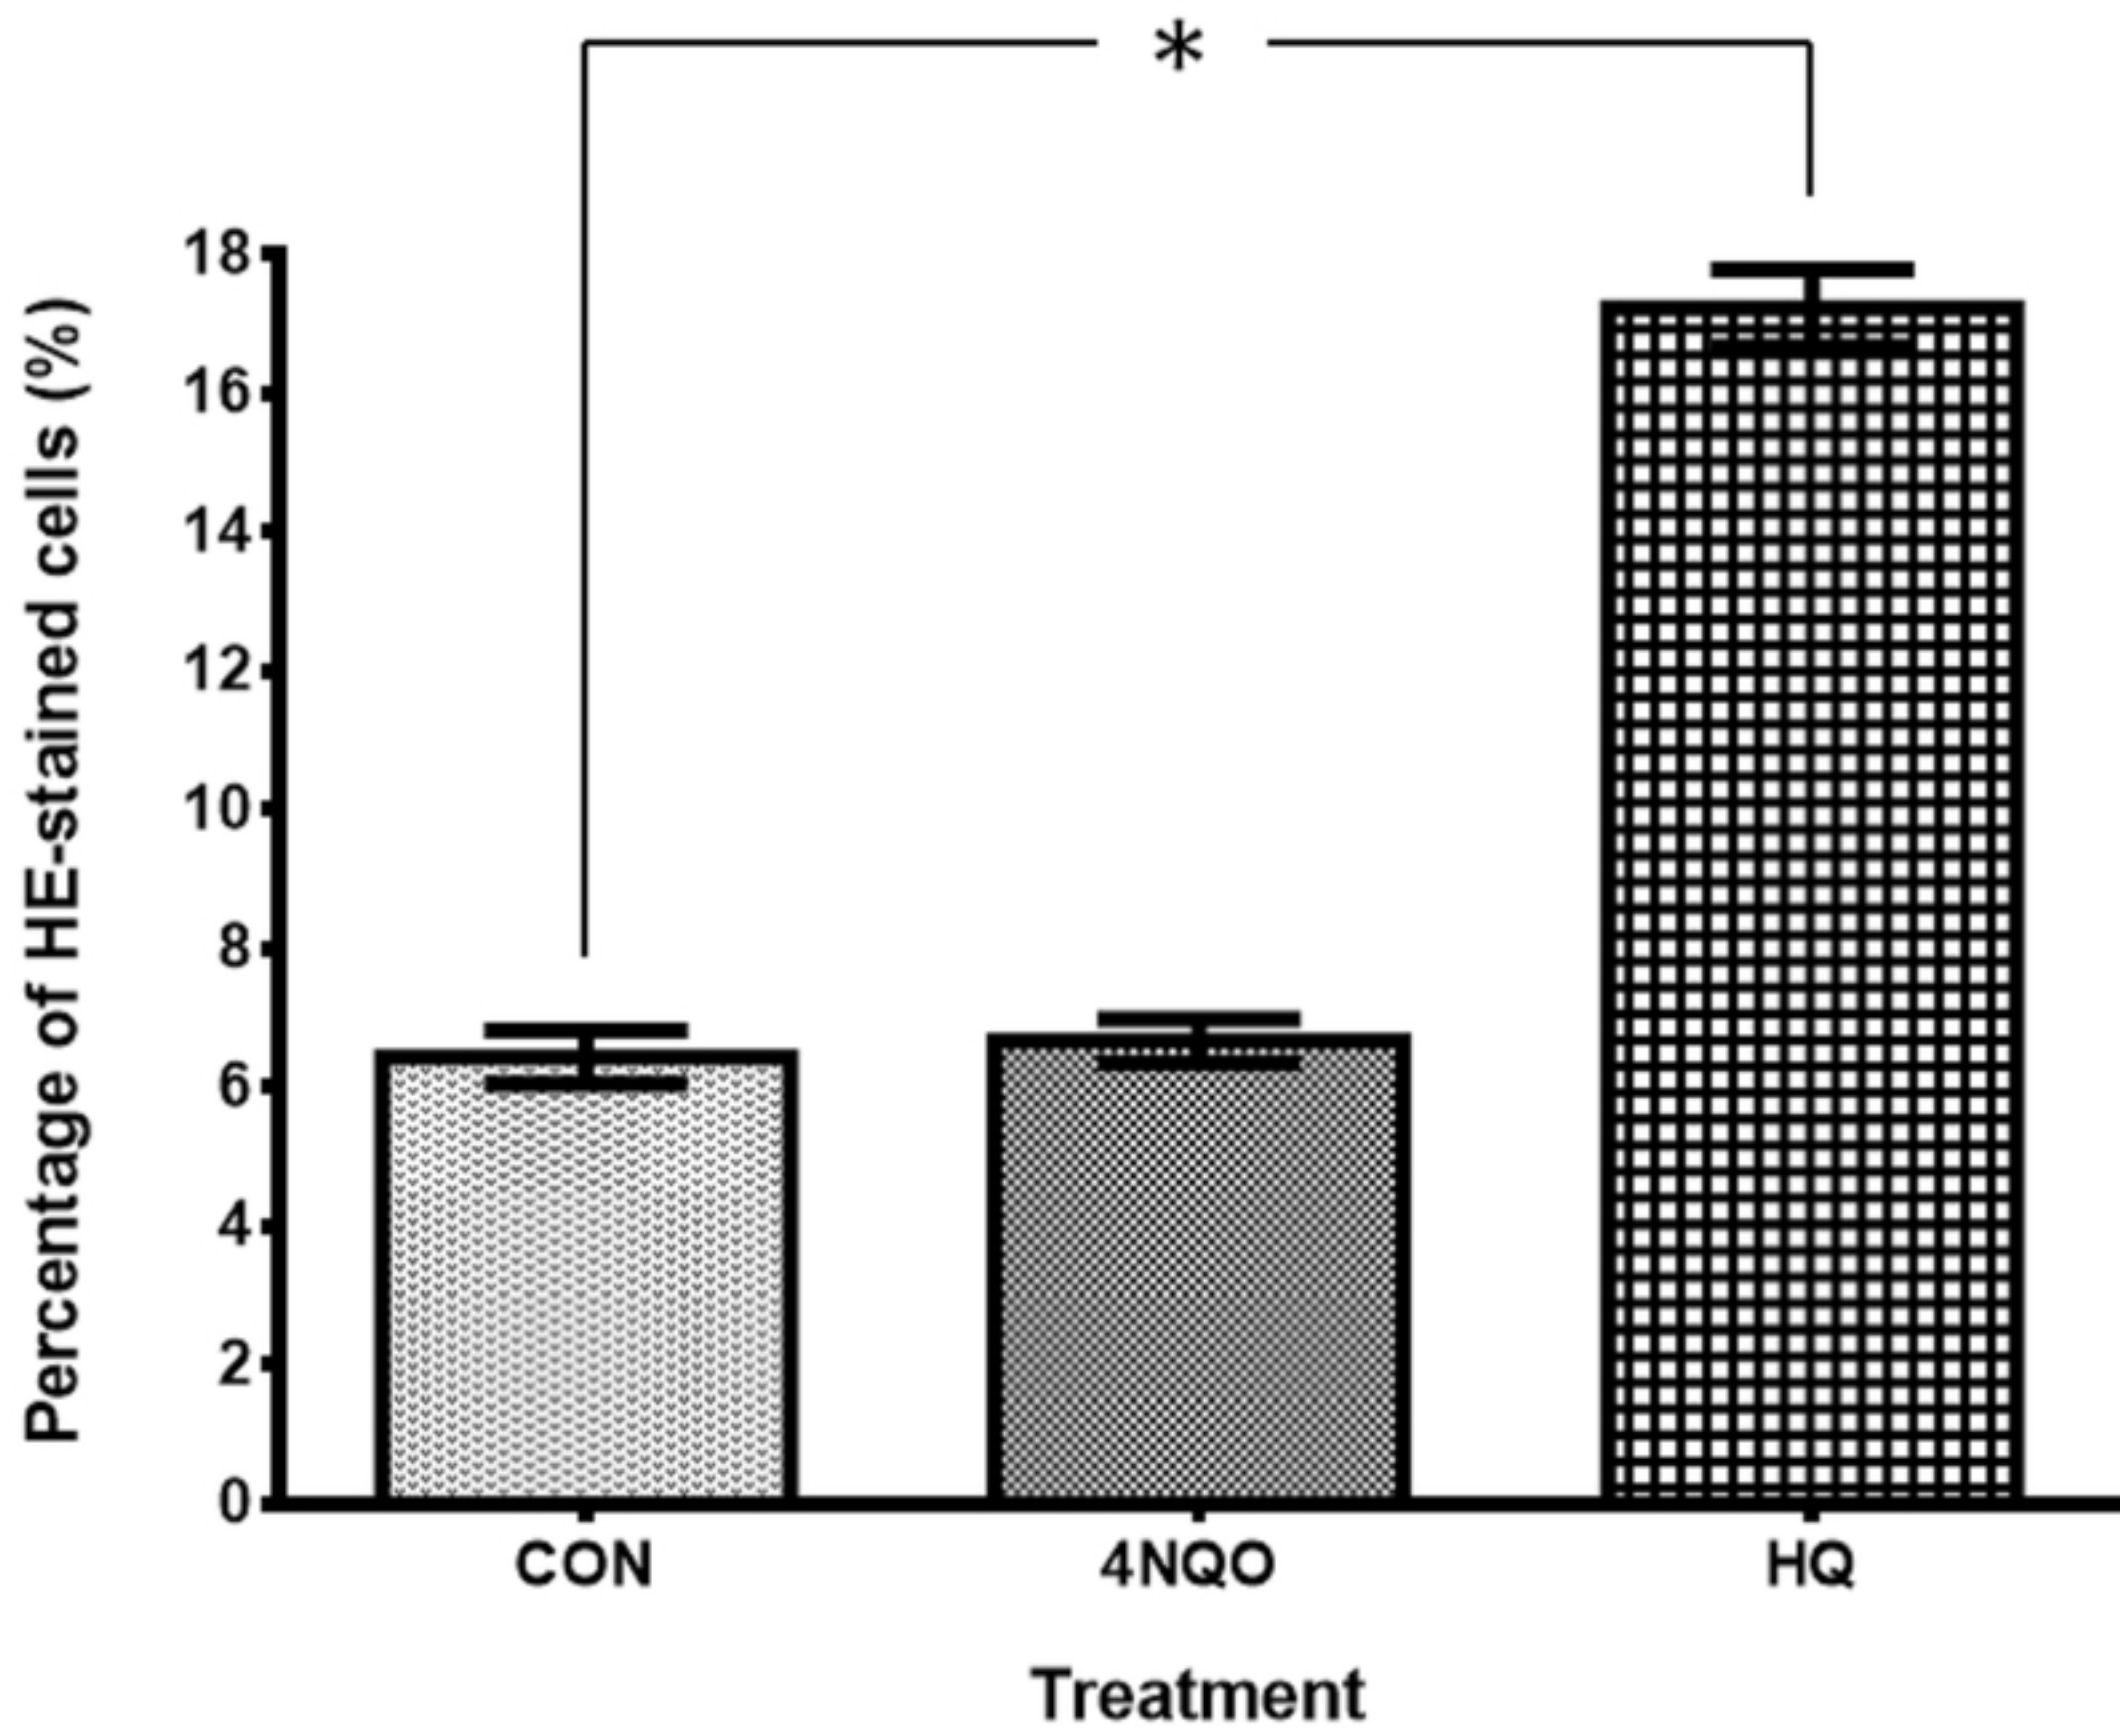

Figure 8A

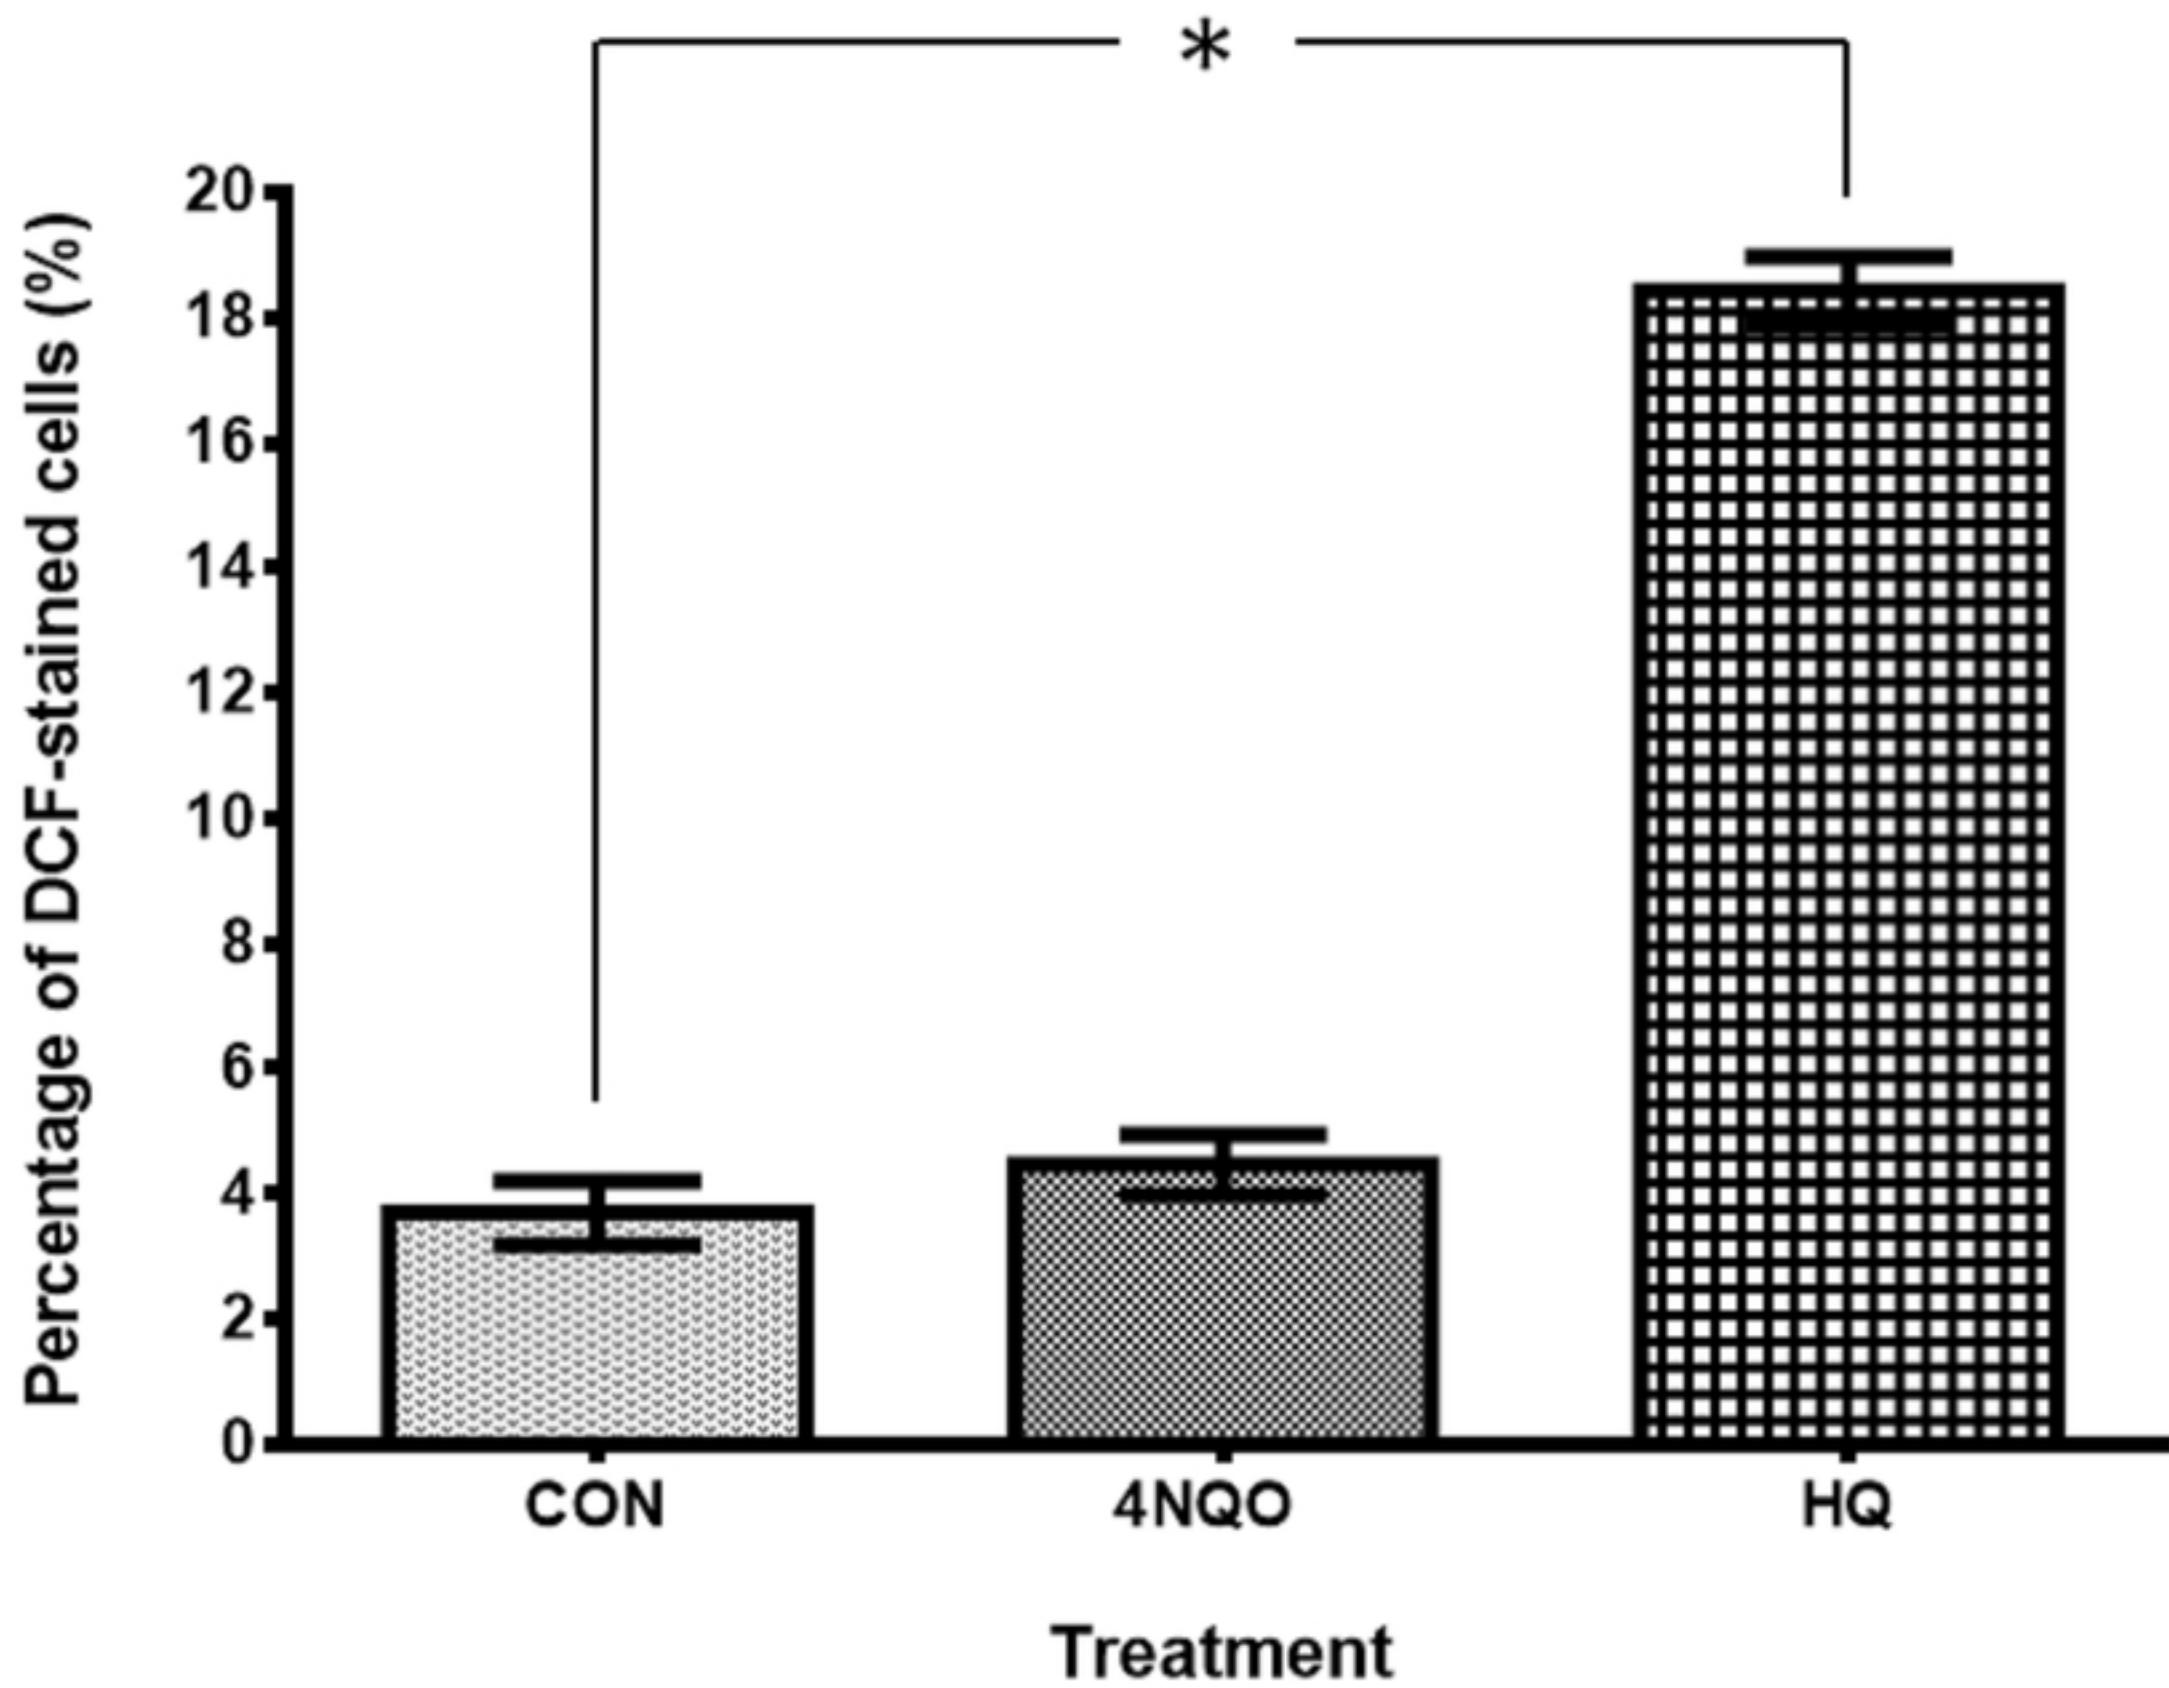

Figure 8B

Percentage of Orange NO probe-stained cells (%)

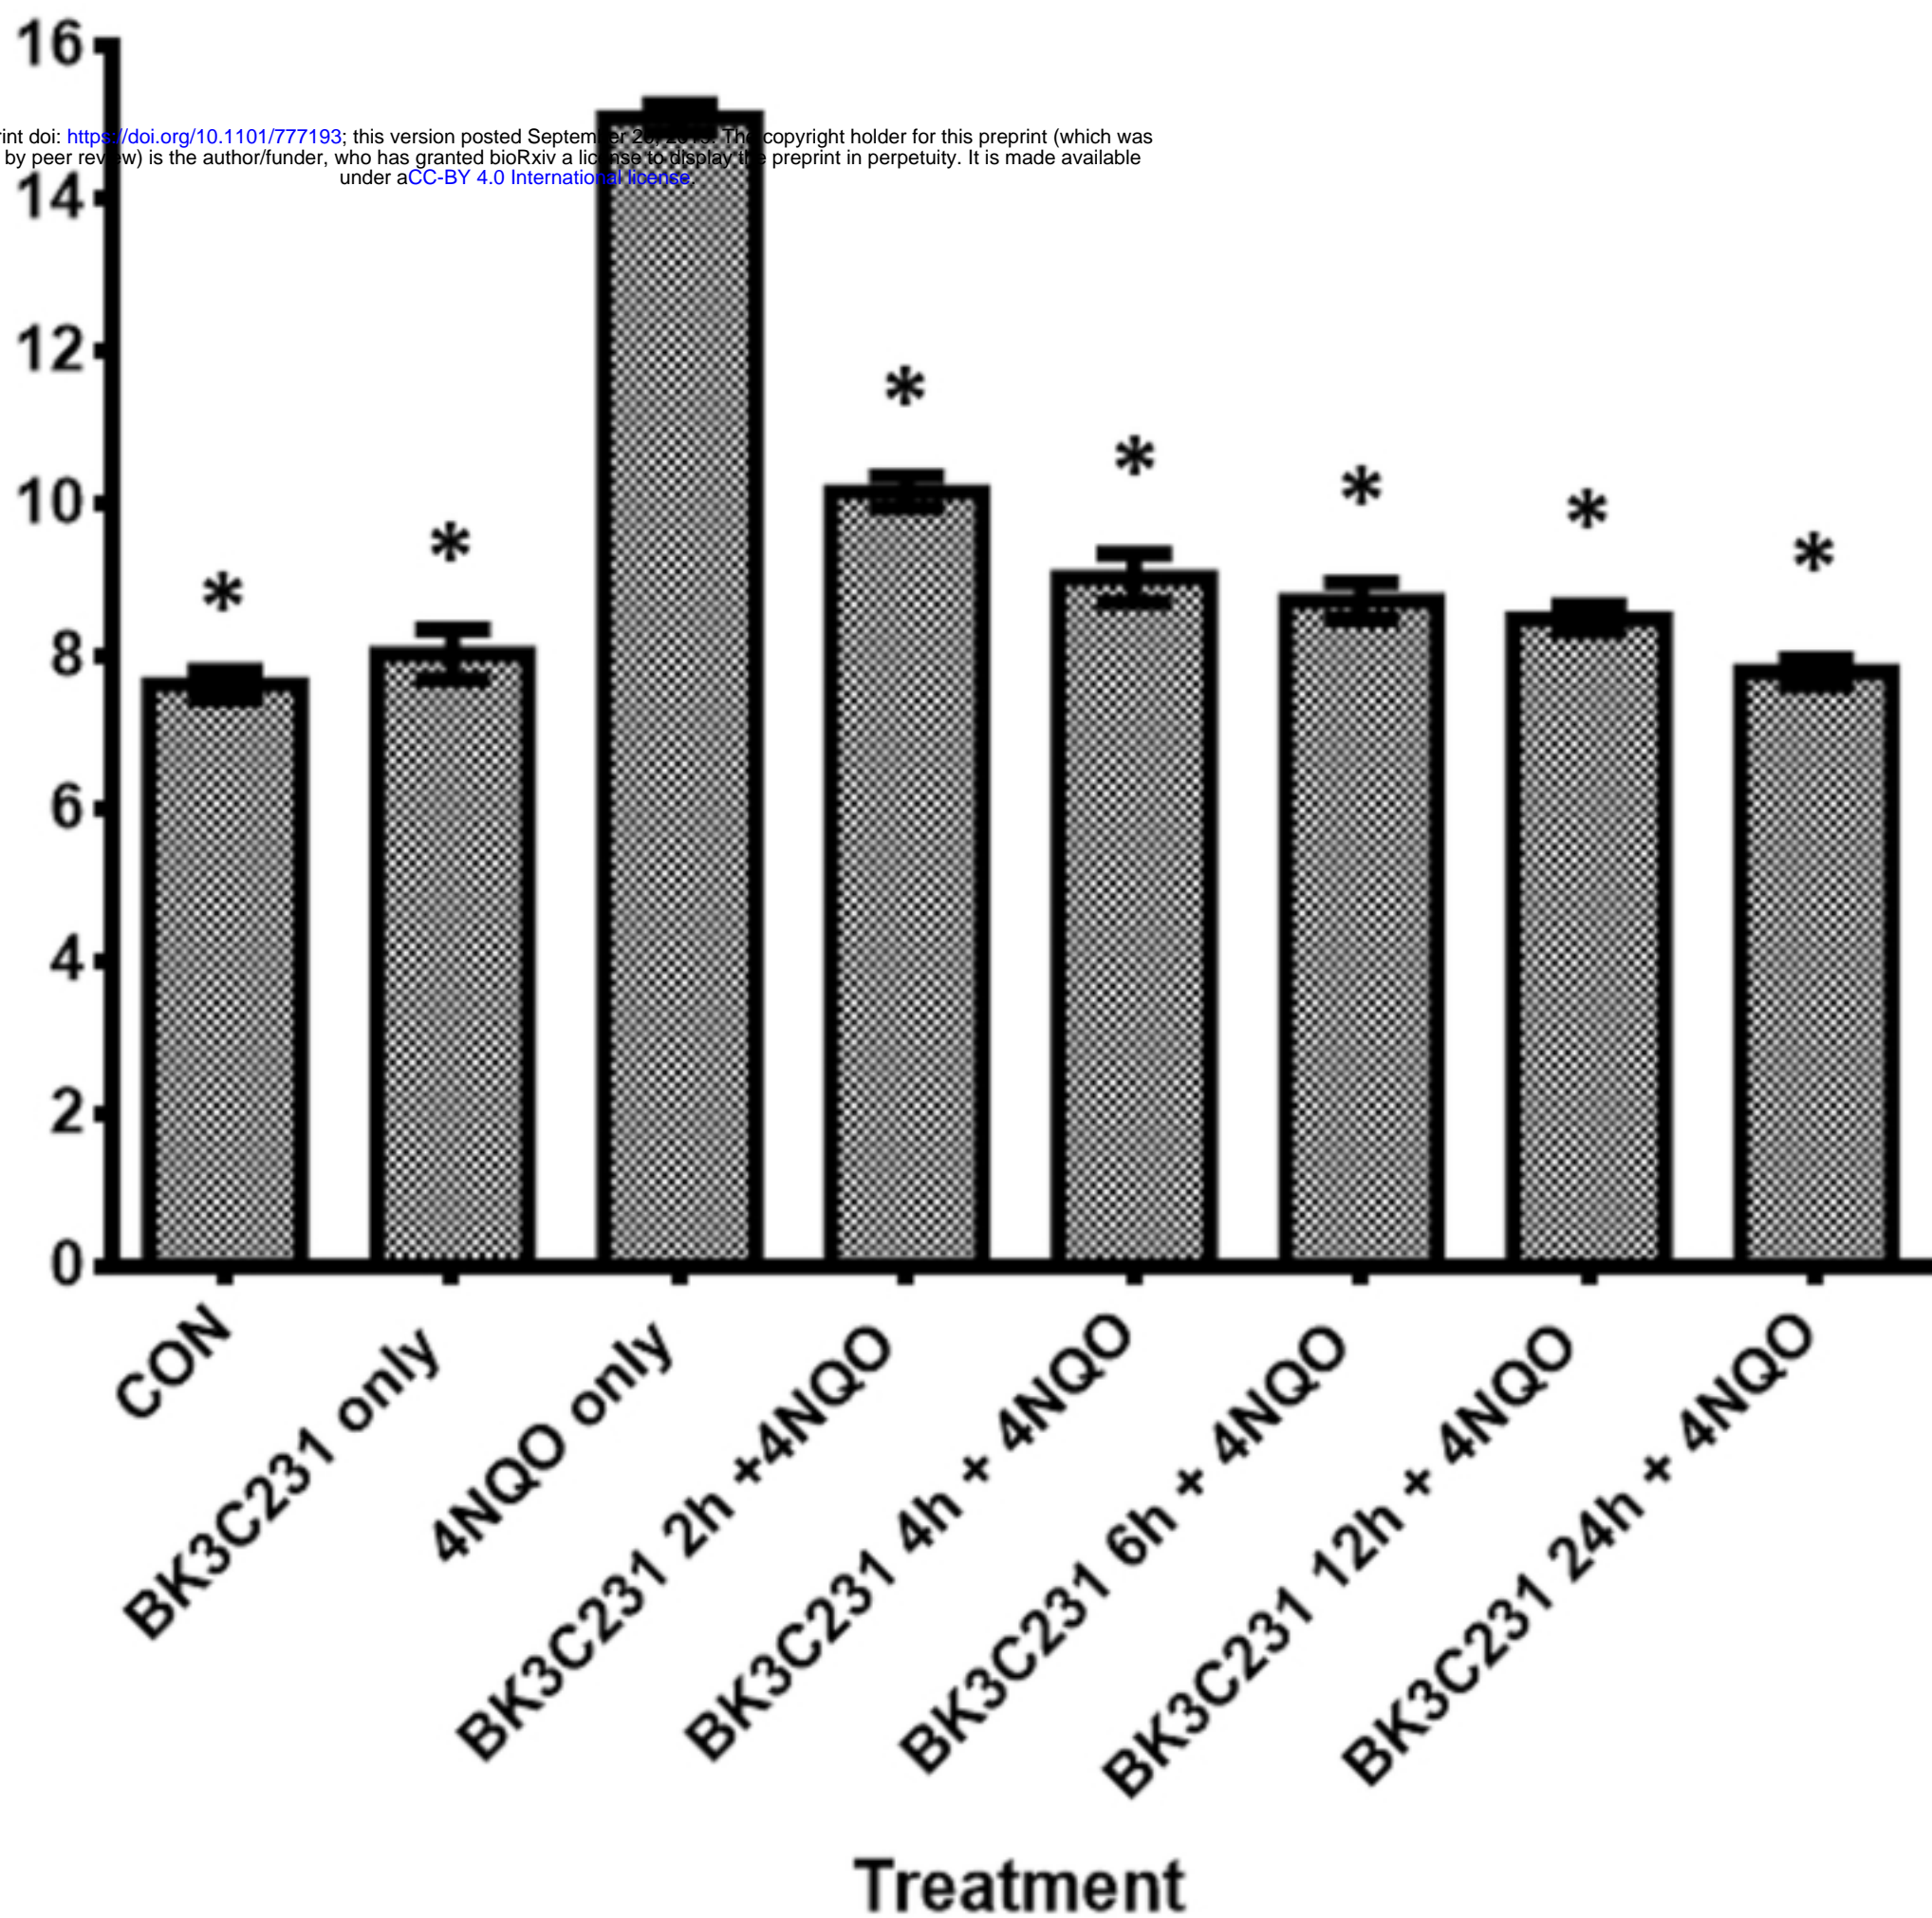

Figure 9A



bioRxiv preprint doi: <https://doi.org/10.1101/777193>; this version posted September 26, 2019. The copyright holder for this preprint (which was not certified by peer review) is the author/funder, who has granted bioRxiv a license to display the preprint in perpetuity. It is made available under aCC-BY 4.0 International license.

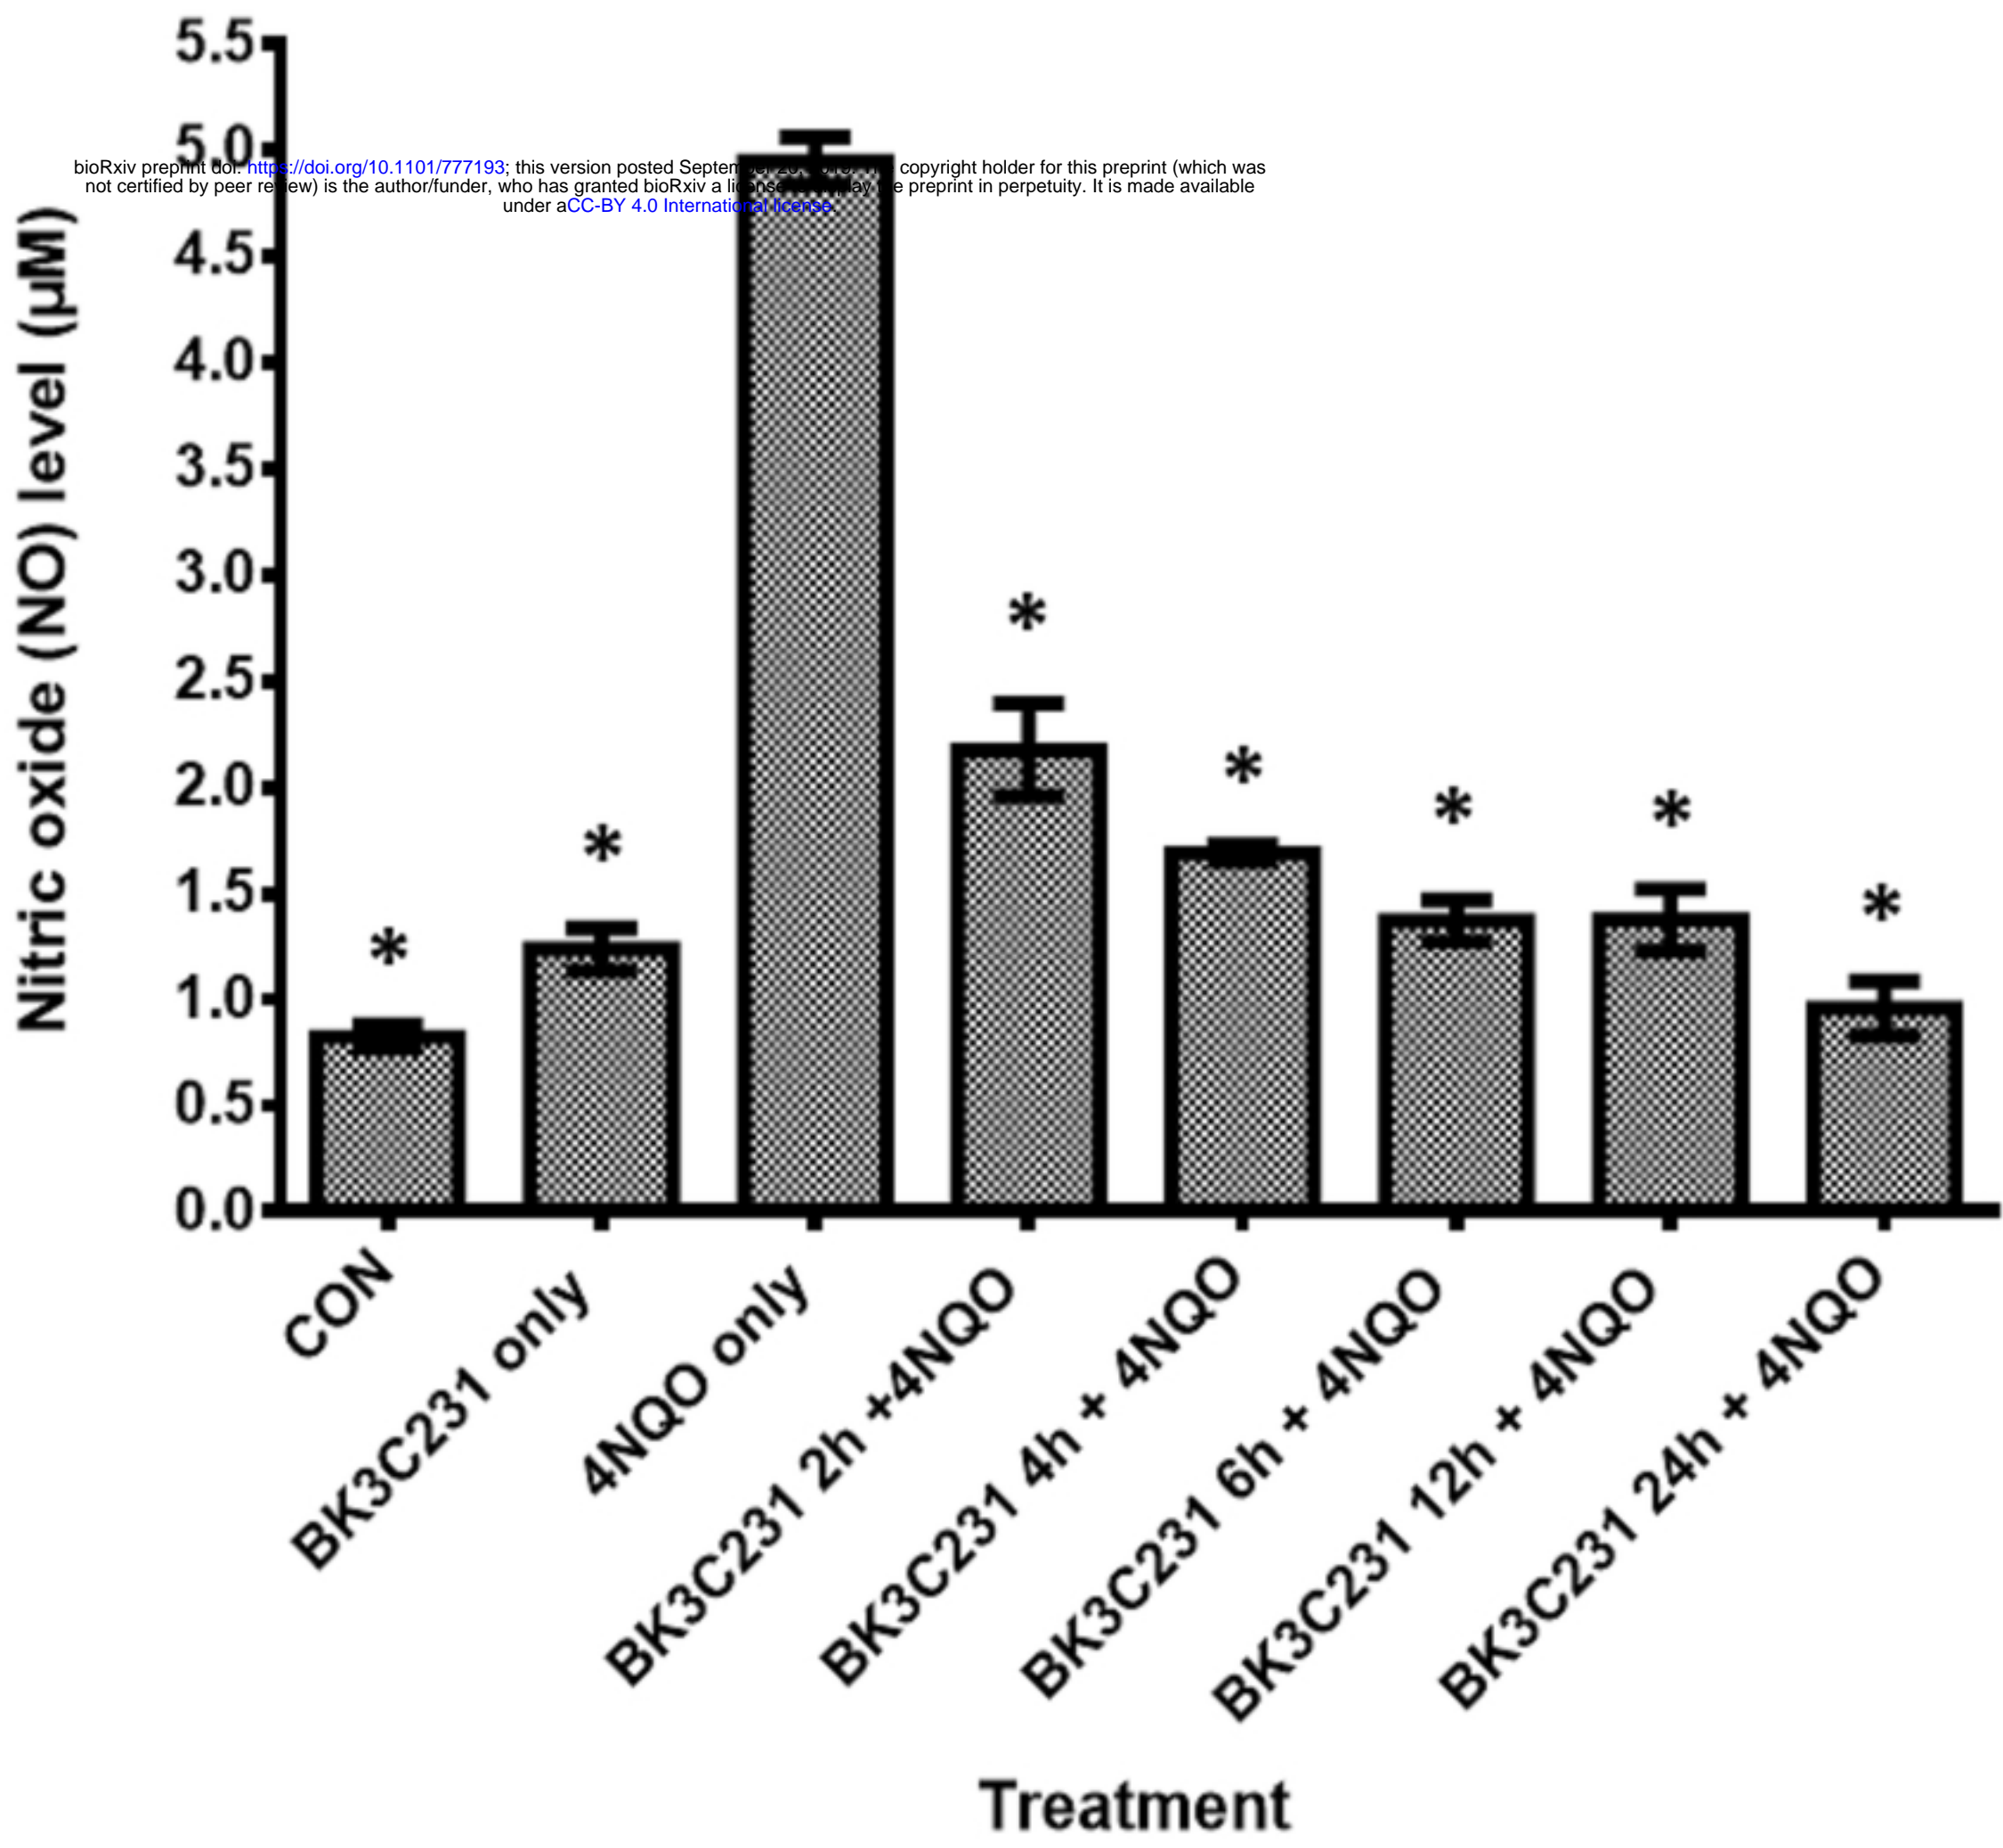

Figure 9B

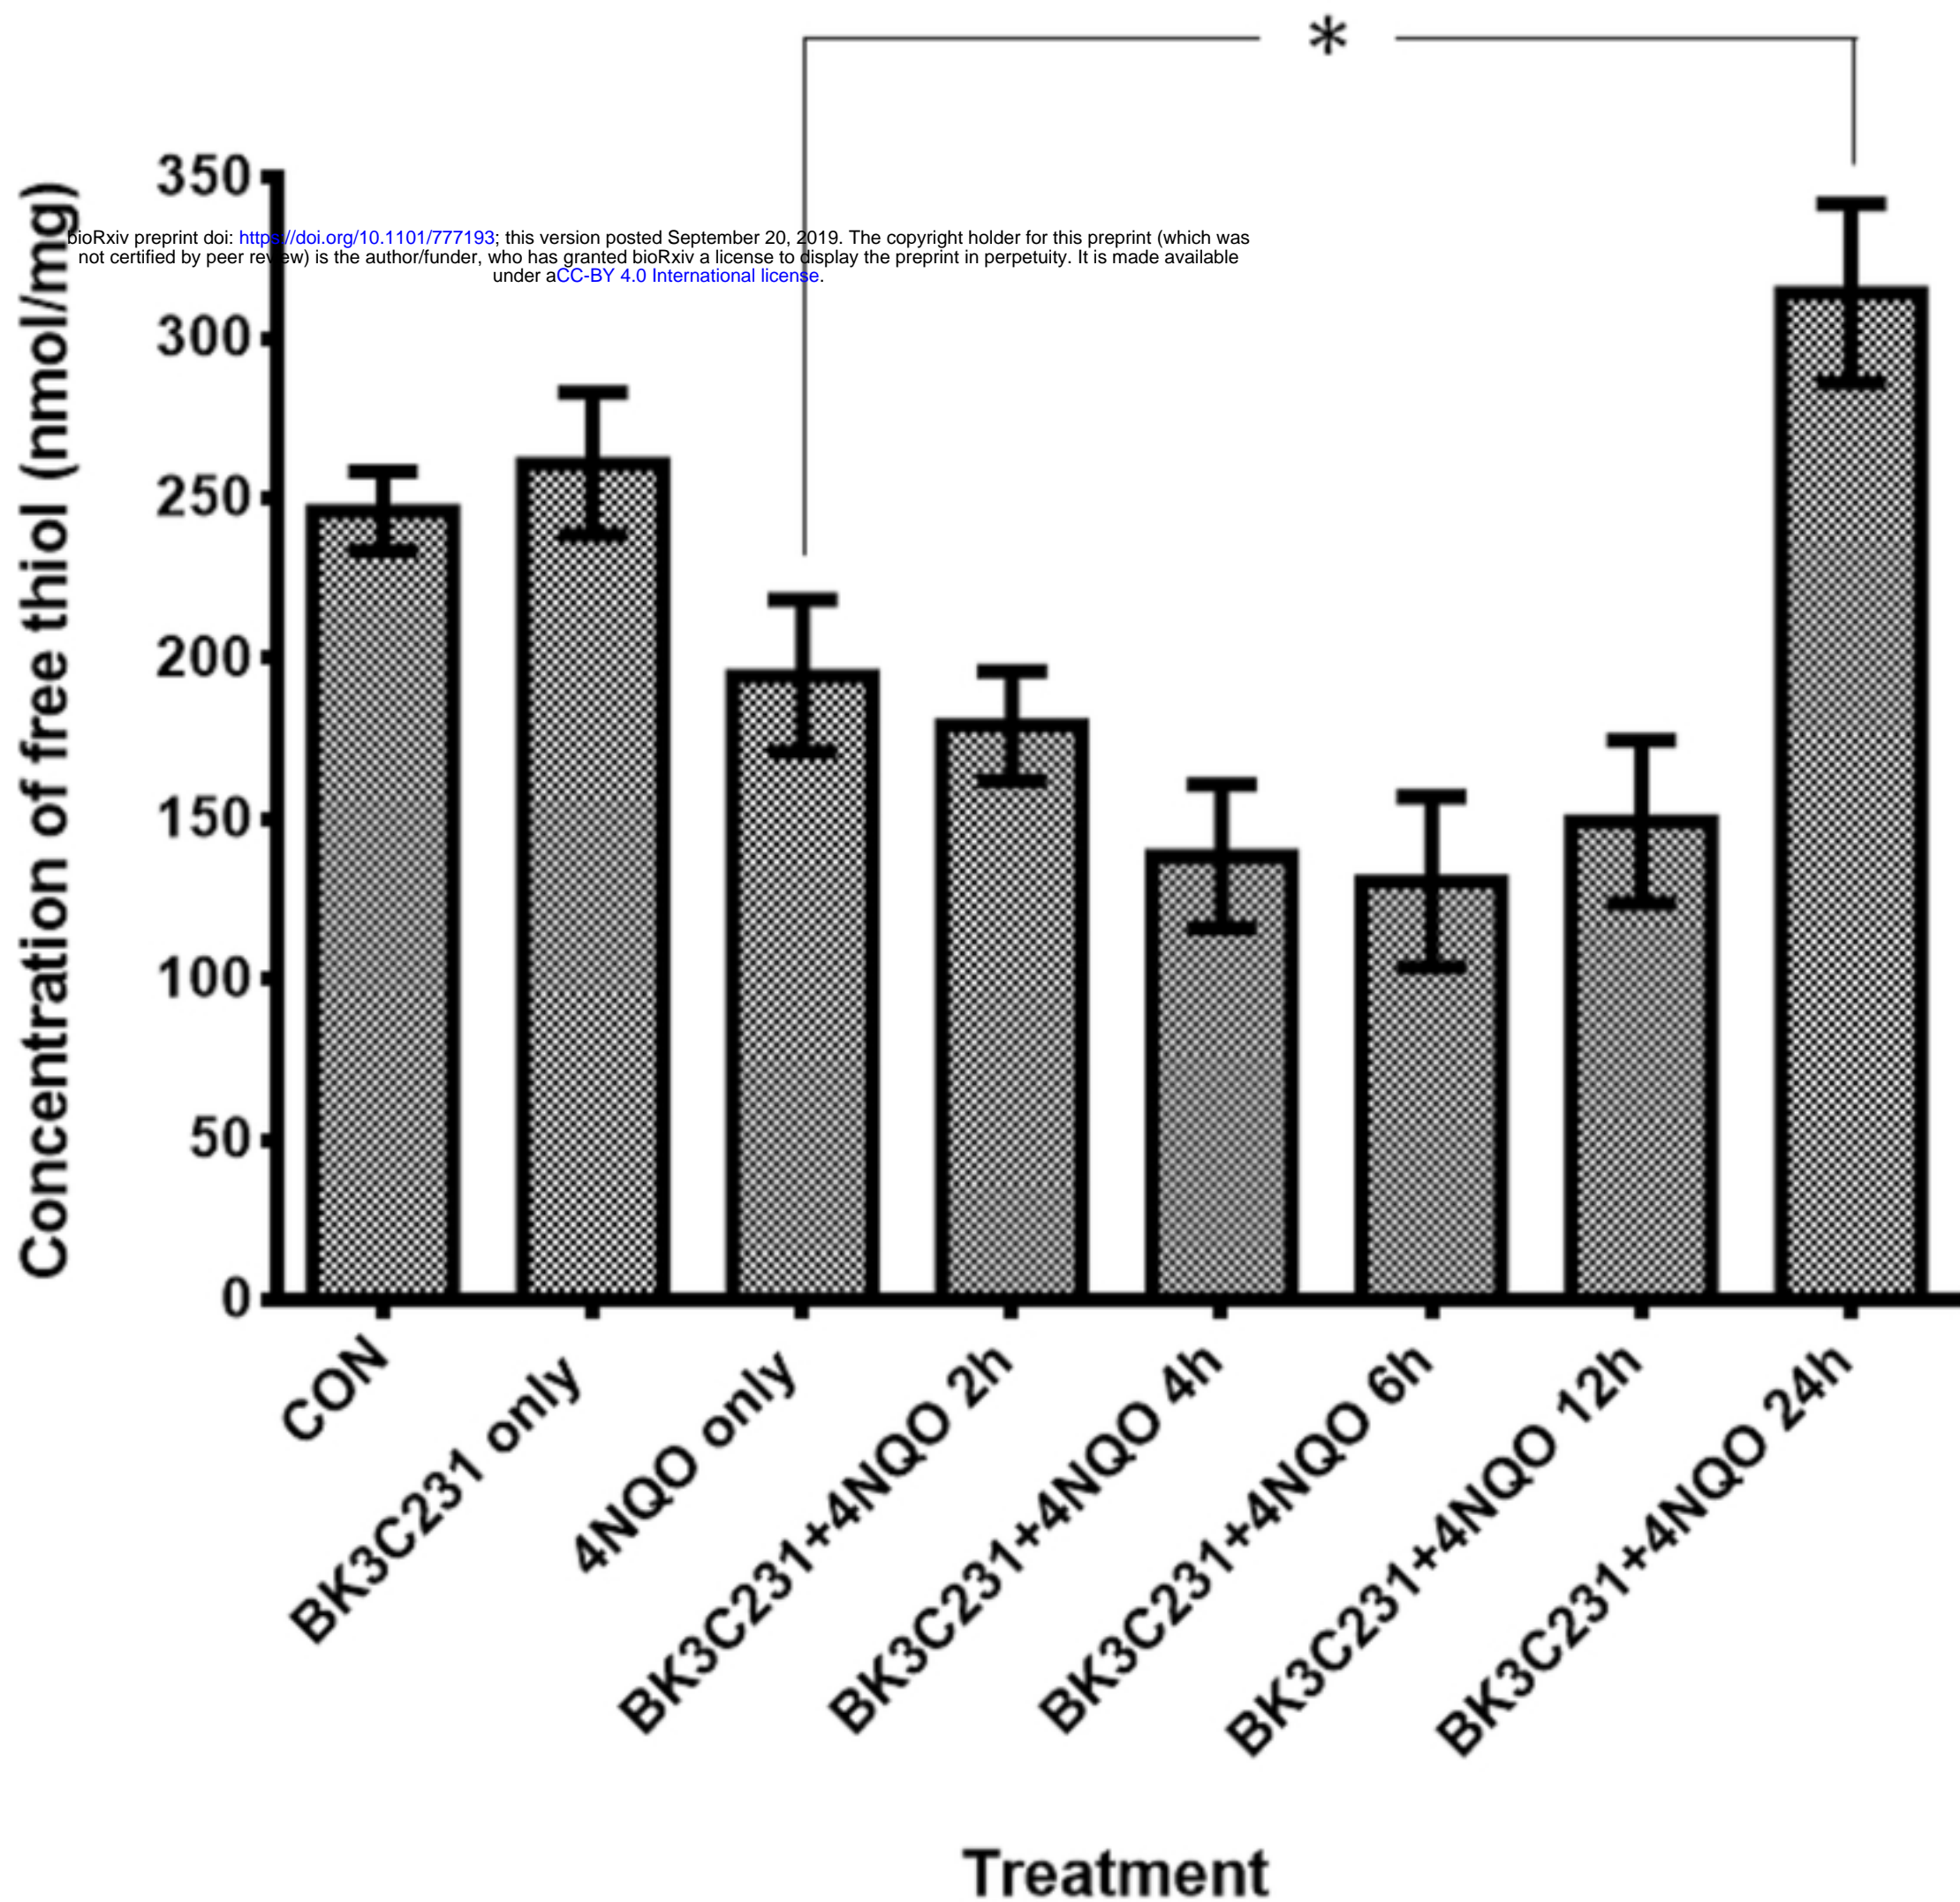

Figure 9C

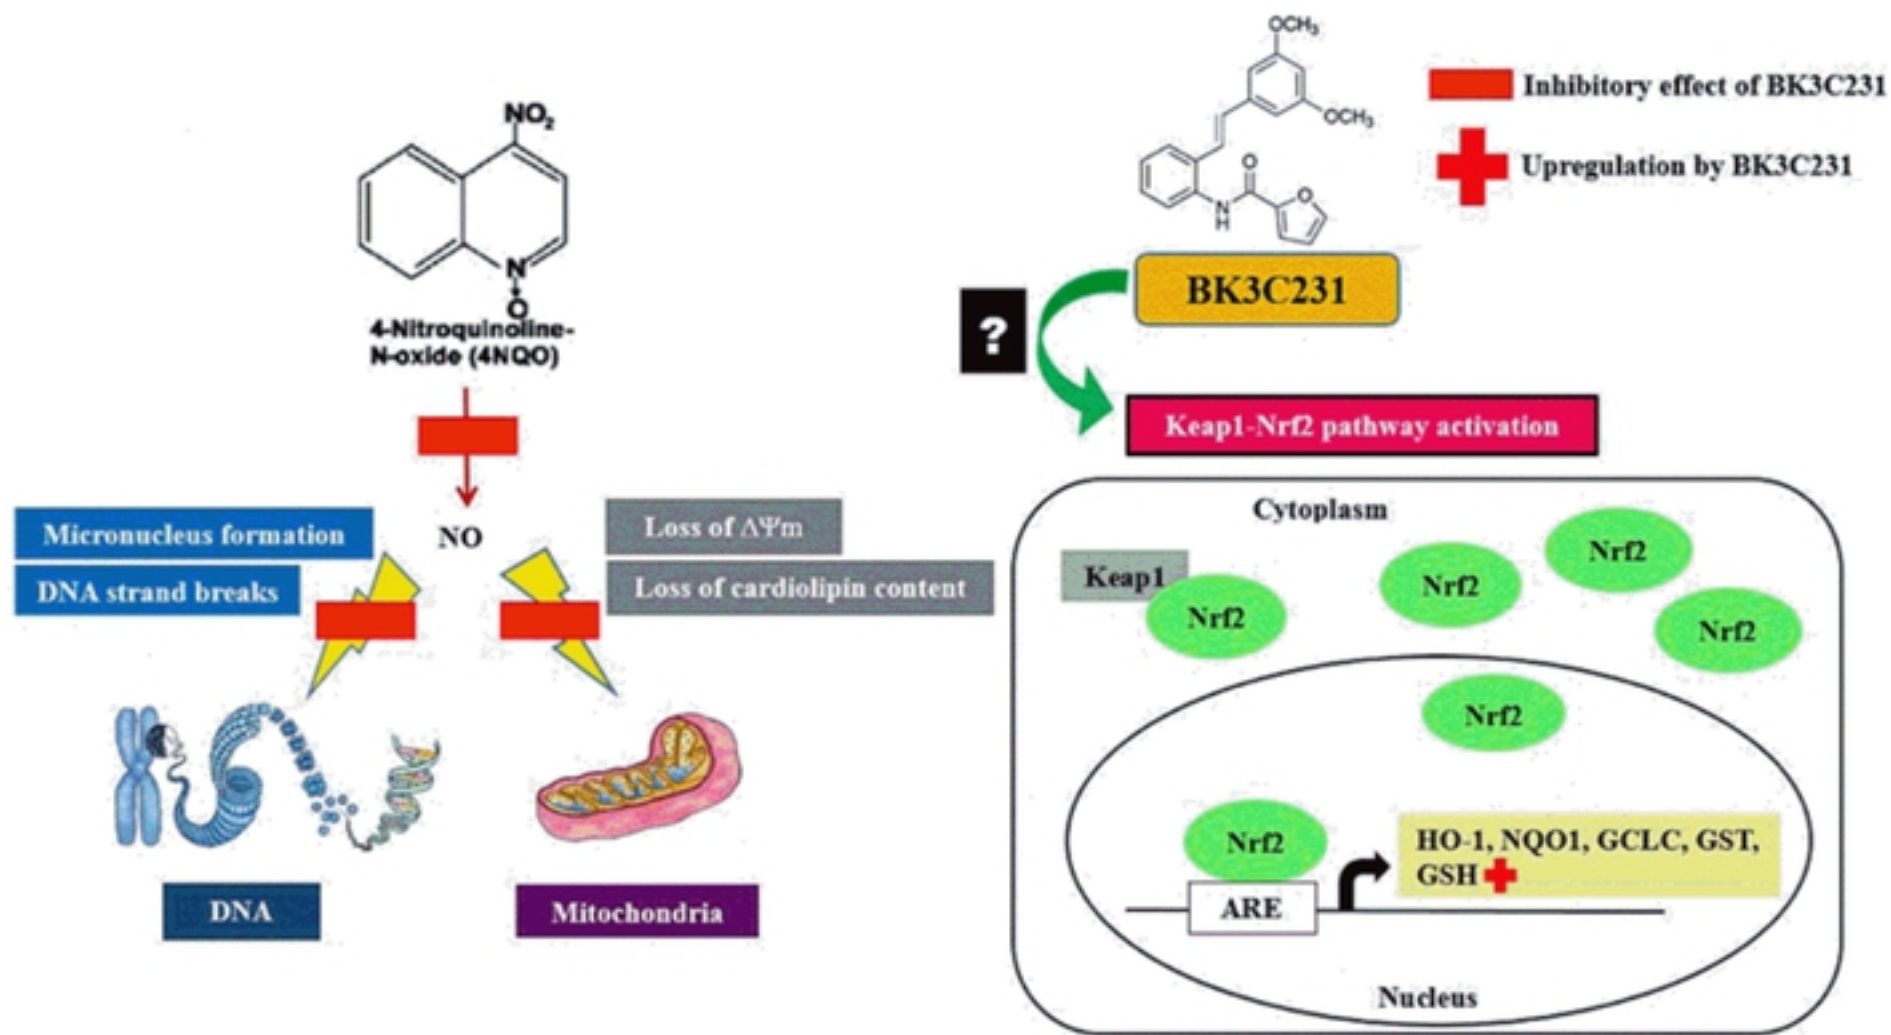

Figure 10
